# Supplementary material for: Prevalence of risk factors of non-communicable diseases in Kerala, India: results of a cross-sectional study
Source: PubMed Central journal article supplement — BMJ Open. 2019 Nov 10;9(11):e027880. doi: 10.1136/bmjopen-2018-027880 (PMC6858196; doi:10.1136/bmjopen-2018-027880), 2019-11-10
Supplement: bmjopen-2018-027880.draft_revisions.pdf [file bmjopen-2018-027880.draft_revisions.pdf]

# BMJ Open

BMJ Open is committed to open peer review. As part of this commitment we make the peer review history of every article we publish publicly available.

When an article is published we post the peer reviewers' comments and the authors' responses online. We also post the versions of the paper that were used during peer review. These are the versions that the peer review comments apply to.

The versions of the paper that follow are the versions that were submitted during the peer review process. They are not the versions of record or the final published versions. They should not be cited or distributed as the published version of this manuscript.

BMJ Open is an open access journal and the full, final, typeset and author-corrected version of record of the manuscript is available on our site with no access controls, subscription charges or pay-per-view fees (<http://bmjopen.bmj.com>).

If you have any questions on BMJ Open's open peer review process please email [info.bmjopen@bmj.com](mailto:info.bmjopen@bmj.com)

# BMJ Open

## Prevalence of risk factors of non-communicable diseases in Kerala, India.

|                               |                                                                                                                                                                                                                                                                                                                                                                                                                                                                                                                                                                                                                                                                                                                                                                                                                                                                                                                                                                                                                                                                                                                                                                                                                                                                                                                                                                                                                                                                                                      |
|-------------------------------|------------------------------------------------------------------------------------------------------------------------------------------------------------------------------------------------------------------------------------------------------------------------------------------------------------------------------------------------------------------------------------------------------------------------------------------------------------------------------------------------------------------------------------------------------------------------------------------------------------------------------------------------------------------------------------------------------------------------------------------------------------------------------------------------------------------------------------------------------------------------------------------------------------------------------------------------------------------------------------------------------------------------------------------------------------------------------------------------------------------------------------------------------------------------------------------------------------------------------------------------------------------------------------------------------------------------------------------------------------------------------------------------------------------------------------------------------------------------------------------------------|
| Journal:                      | <i>BMJ Open</i>                                                                                                                                                                                                                                                                                                                                                                                                                                                                                                                                                                                                                                                                                                                                                                                                                                                                                                                                                                                                                                                                                                                                                                                                                                                                                                                                                                                                                                                                                      |
| Manuscript ID                 | bmjopen-2018-027880                                                                                                                                                                                                                                                                                                                                                                                                                                                                                                                                                                                                                                                                                                                                                                                                                                                                                                                                                                                                                                                                                                                                                                                                                                                                                                                                                                                                                                                                                  |
| Article Type:                 | Research                                                                                                                                                                                                                                                                                                                                                                                                                                                                                                                                                                                                                                                                                                                                                                                                                                                                                                                                                                                                                                                                                                                                                                                                                                                                                                                                                                                                                                                                                             |
| Date Submitted by the Author: | 12-Nov-2018                                                                                                                                                                                                                                                                                                                                                                                                                                                                                                                                                                                                                                                                                                                                                                                                                                                                                                                                                                                                                                                                                                                                                                                                                                                                                                                                                                                                                                                                                          |
| Complete List of Authors:     | <p>Sarma, P; Sree Chitra Tirunal Institute for Medical Science and Technology, Achuth Menon Centre for Health Science Studies<br/>Sadanandan, Rajeev; Government of Kerala, Department of Health &amp; Family Welfare<br/>Thulaseedharan, Jissa Vinoda; Sree Chitra Tirunal Institute for Medical Sciences and Technology, Achutha Menon Centre for Health Science Studies<br/>Soman, Biju; Sree Chitra Tirunal Institute for Medical Sciences and Technology, Achutha Menon Centre for Health Science Studies<br/>Srinivasan, Kannan; Sree Chitra Tirunal Institute for Medical Sciences and Technology, Achutha Menon Centre for Health Science Studies<br/>Varma, R; Sree Chitra Tirunal Institute for Medical Science and Technology, Achutha Menon Centre for Health Science Studies<br/>Nair, Manju; Sree Chitra Tirunal Institute for Medical Sciences and Technology, Achutha Menon Centre for Health Science Studies<br/>Pradeepkumar, AS; Sree Chitra Tirunal Institute for Medical Sciences and Technology, Achutha Menon Centre for Health Science Studies<br/>Jeemon, Panniyammakal; Sree Chitra Tirunal Institute for Medical Sciences and Technology, Achutha Menon Centre for Health Science Studies<br/>Thankappan, KR; Sree Chitra Tirunal Institute for Medical Sciences and Technology, Achutha Menon Centre for Health Science Studies<br/>Kutty, Raman; Sree Chitra Tirunal Institute for Medical Sciences and Technology, Achutha Menon Centre for Health Science Studies</p> |
| Keywords:                     | Prevalence, NCD risk factors, Kerala, Diabetes, Hypertension < CARDIOLOGY                                                                                                                                                                                                                                                                                                                                                                                                                                                                                                                                                                                                                                                                                                                                                                                                                                                                                                                                                                                                                                                                                                                                                                                                                                                                                                                                                                                                                            |
|                               |                                                                                                                                                                                                                                                                                                                                                                                                                                                                                                                                                                                                                                                                                                                                                                                                                                                                                                                                                                                                                                                                                                                                                                                                                                                                                                                                                                                                                                                                                                      |

SCHOLARONE™  
Manuscripts

## Prevalence of risk factors of non-communicable diseases in Kerala, India.

Authors: P Sankara Sarma<sup>1</sup>, Rajeev Sadanandan<sup>2</sup>, Jissa Vinoda Thulaseedharan<sup>1</sup>, Biju Soman<sup>1\*</sup>, Kannan Srinivasan<sup>1</sup>, Ravi Prasad Varma<sup>1</sup>, Manju R Nair<sup>1</sup>, AS Pradeepkumar<sup>1</sup>, Panniyammakal Jeemon<sup>1</sup>, Kavumpurathu Raman Thankappan<sup>1</sup>, V Raman Kutty<sup>1</sup>

\*Corresponding author: Biju Soman, Professor, Achutha Menon Centre for Health Science Studies (AMCHSS), Sree Chitra Tirunal Institute for Medical Sciences & Technology (SCTIMST), Thiruvananthapuram, Kerala, India, PIN695011; [bijusoman@sctimst.ac.in](mailto:bijusoman@sctimst.ac.in), +91 944 786 2736

### Affiliations:

1. Sree Chitra Tirunal Institute for Medical Sciences and Technology, Trivandrum
2. Department of Health and Family Welfare, Government of Kerala.

P Sankara Sarma, AMCHSS, SCTIMST, Thiruvananthapuram, India

Rajeev Sadanandan, Dept. of Health & Family Welfare, Govt. of Keala, Thiruvananthapuram, India

Jissa Vinoda Thulaseedharan, AMCHSS, SCTIMST, Thiruvananthapuram, India

K Srinivasan, AMCHSS, SCTIMST, Thiruvananthapuram, India

Ravi Prasad Varma, AMCHSS, SCTIMST, Thiruvananthapuram, India

Manju R Nair, AMCHSS, SCTIMST, Thiruvananthapuram, India

AS Pradeep Kumar, AMCHSS, SCTIMST, Thiruvananthapuram, India

Panniyammakal Jeemon, AMCHSS, SCTIMST, Thiruvananthapuram, India

Kavumpurathu Raman Thankappan, AMCHSS, SCTIMST, Thiruvananthapuram, India

V Raman Kutty, AMCHSS, SCTIMST, Thiruvananthapuram, India

"This work was supported by the Department of Health and Family Welfare, Government of Kerala as per its order no.GO(Rt)No.609/2016/H&FWD Dated 24/02/2016.

Number of words: 3562

## Abstract

**Objectives:** To estimate the prevalence of non-communicable disease (NCD) risk factors in Kerala using the state representative data.

**Design:** Community based cross-sectional survey.

**Participants:** In 2016-17 a representative sample of 12,012 adults of 18-69 years age group were studied.

**Main outcome measures:** NCD risk factors as stipulated by the World Health Organization's approach to NCD risk factors Surveillance. Parameters studied include physical activity score, anthropometry, blood pressure and fasting blood sugar and spot urine sample to estimate dietary intake of salt.

**Results:** Mean age was 42.5 years (SD=14.8). Abdominal obesity was prevalent in 72.6% (95% CI 70.7 to 74.5) females and 39.1% (95% CI 36.6 to 41.7) males. Current use of tobacco and alcohol in males were 20.3% (95% CI 18.6 to 22.1) and 28.9% (95% CI 26.5 to 31.4) respectively. The overall prevalence of hypertension and diabetes were 30.4% (95% CI 29.1 to 31.7) and 19.2% (95% CI 18.1 to 20.3) respectively. Hypertension was prevalent in 34.6% (95% CI 32.6 to 36.7) males and 28% (95% CI 26.4 to 29.4) females. Only 12.9% (95% CI 11.3 to 14.7) of persons with hypertension and 15.5% (95% CI 13.5 to 19.8) of the persons with diabetes had their diseases under control. Only 9.7% (95% CI 8.5 to 11.0) males and 5.7% (95% CI 5.0 to 6.6) females were free from any of the NCD risk factors studied.

**Conclusion:** Only 7.2% of adults in Kerala had none of the NCD risk factors that were studied. The prevalence of hypertension and diabetes in Kerala were found to be higher than the estimates from national surveys like NFHS4, but less than estimates from localised surveys. The higher rates of NCD risk factors and lower rates of disease control calls for concerted primary and secondary prevention strategies to address the future burden of NCDs.

**Keywords:** Prevalence, NCD risk factors, Kerala, diabetes, hypertension

### Strengths and limitations

- The study gives robust rates of NCD risk factors in Kerala that can be compared other studies in India and abroad, as we had used the widely validated WHO STEPS questionnaire and standard pieces of equipment to study a representative sample of adults.
- We took the third reading for blood pressure (BP) only when the difference in systolic BP of the previous two readings was  $>10$  mmHg and that of diastolic BP  $>6$  mmHg which is in deviation to the WHO STEPS guidelines that insist on taking three readings for everyone.
- The biochemical measurements for serum cholesterol and measurements of hip circumference were not done this study due to logistic limitations, but they were not the core features of step 1 and step 2.
- To our knowledge, no other study on NCD risk factors in Kerala in the recent past, including those by the same group of researchers, were done on a statewide representative sample of this scale.

## INTRODUCTION

Over two third (67%) of disease burden in India measured by disability-adjusted life years (DALYs) is attributable to Non-communicable diseases (NCDs) and injuries<sup>1</sup>. The India state-level disease burden estimates suggest significant differences between states in the composition of disease burden<sup>1</sup>. Compared to other states in India, the state of Kerala is relatively in an advanced stage of epidemiological transition<sup>2</sup>. Over 90% of premature mortality in Kerala (mortality in the age group of 15-69 years) is attributable to NCDs<sup>2</sup>. Furthermore, nearly a quarter of the total disease burden in DALYs is due to four major NCDs (ischemic heart disease, stroke, chronic obstructive pulmonary diseases and diabetes)<sup>1</sup>.

While the disease burden estimates based on modelling of available data are useful in planning resource allocation, strategic investments in prevention and management of NCDs require accurate appraisals of their prevalence and risk factors. Hence we conducted a statewide cross-sectional survey in a representative sample of both urban and rural Kerala. The objective of this paper is to describe the current prevalence of NCD risk factors in Kerala.

## METHODS

### Study settings

The state of Kerala, in South India, has a population of 33.4 million<sup>3</sup> and an area of 38,863 square kilometres. Nearly half the population is urban. A cross-sectional survey was conducted in all the 14 districts of Kerala, in both rural and urban areas from October 2016 to March 2017.

### Sampling

1  
2  
3 A minimum sample size of 12000 adults was considered to provide separate prevalence  
4 estimates in different strata (for example; among male/female and urban/rural residents), of  
5 various NCD risk factors with an expected prevalence of 5%, and relative precision of 20%.  
6  
7  
8 We also considered a design effect of 1.5 and a response rate of 90% in the sample size  
9 estimation.  
10  
11  
12  
13

14  
15 A multi-stage cluster sampling strategy was adopted to identify a representative sample of  
16 eligible participants for the cross-sectional survey (Fig 1). The primary sampling units were a  
17 well-defined geographical area administered by the local government institution, i.e. municipal  
18 corporations and municipalities in urban areas and Grama Panchayats (GPs) - Grass-root level  
19 elected governments in the rural areas. The population of GPs in Kerala are around 20000-  
20 40000 whereas those in other states are around 1000-4000. In most districts, data were  
21 collected from two urban and three rural sites except in two districts, which had only one  
22 urban site each. The survey was conducted in all the municipal corporations (n=6) and  
23 randomly selected 20 of 87 municipalities in the urban region. Similarly, three GPs were  
24 randomly selected from each district (42 GPs from 14 districts).  
25  
26  
27  
28  
29  
30  
31  
32  
33  
34  
35  
36  
37  
38  
39

40 Each of the primary sampling units is further divided into wards. In the next stage of sampling,  
41 a total 200 of the 390 wards of the municipal corporations and 499 of the 697 wards of the  
42 selected municipalities were randomly selected for the survey. All the 724 wards of selected  
43 GPs were also selected. In the final stage of sampling, one cluster of nine households was  
44 identified from each ward. For the selection of a cluster of households, one household was  
45 identified randomly from the available list of all the households in the selected ward and  
46 followed by the selection of eight more households with consecutive house numbers.  
47  
48  
49  
50  
51  
52  
53  
54  
55  
56  
57  
58  
59  
60

## Study participants

All the individuals between the age group of 18-69 years were eligible to be part of the survey. If there were more than one adult in this age group, KISH method<sup>4</sup> was used to identify one of them from the household. Pregnant women were excluded from physical and biochemical measurements.

## Ethical considerations

All participants of the study have given written informed consent. The Institutional Ethics Committee of SCTIMST, Trivandrum formally approved the conduct of the study (SCT/IEC/902/MAY-2016 dated 11/05/2016).

## Study measurements

### *Interview Schedule*

A structured interview schedule based on the WHO STEPwise approach to NCD risk factors Surveillance (STEPS) 5, which was validated in Malayalam<sup>6</sup> was used for this survey. Awareness of diabetes and hypertension status was assessed by asking questions about past diagnosis and history of both conditions. Global physical activity questionnaire (GPAQ) was used to assess physical activity levels<sup>7</sup>.

### *Anthropometric measurements*

Physical and clinical measurements included height, weight, waist circumference, blood pressure and heart rate. All the measurements were taken in the participant's household, by trained nurses. Height was measured using a SECA 213 stand-alone stadiometer in centimetres. Weight was measured using a portable SECA 803 battery operated electronic



1  
2  
3 weighing scale in kilograms. Both measurements were taken with the participants wearing no  
4  
5 footwear and any heavy objects in their body such as mobile phones, wallets and heavy belts.  
6  
7 Additionally, SECA 201 ergonomic retractable tape was used to measure waist circumference.  
8  
9  
10 In order to measure waist circumference, the lower palpable margin of the ribs and the upper  
11  
12 margin of the iliac crest were identified initially and then marked the midpoints between these  
13  
14 margins along the mid-axillary line on both sides were marked. The measurement tape was  
15  
16 then wrapped horizontally all around by connecting the marked points on both sides of the  
17  
18 participant's body. Height was noted to the nearest 0.5 cm, weight to the nearest 10 gm and  
19  
20 waist circumference to the nearest 0.1 cm at the end of the normal expiration.  
21  
22  
23  
24

#### 25 *Measurement of blood pressure and pulse rate*

26  
27

28 The blood pressure(BP) and pulse rate were measured using standard battery operated  
29  
30 automatic BP monitors (OMRON HEM-7120). Before measurement, the participants were  
31  
32 seated comfortably in a relaxed upright position for at least five minutes. Appropriate size cuff  
33  
34 was used to take two readings of blood pressure and pulse rate three minutes apart.<sup>8</sup> The  
35  
36 machine was switched off between the readings, after recording the systolic BP and diastolic  
37  
38 BP in mm Hg and the heart rate in beats/minute. If systolic BP readings varied more than 10  
39  
40 mmHg or diastolic BP readings more than six mmHg, between the two initial measurements,  
41  
42 then a third reading was taken. The mean of the last two readings of blood pressure was  
43  
44 considered as the final BP.  
45  
46  
47  
48  
49

#### 50 *Biochemical measurements*

51  
52

53 A spot urine sample (20 ml) was collected from each participant for urinary sodium and  
54  
55 creatinine estimation. Urinary sodium was assessed using indirect ion-selective electrode  
56  
57  
58  
59  
60

1  
2  
3 method, and urinary creatinine was measured using the alkaline picrate method in an  
4 accredited central laboratory. Modified Kawasaki formulae were used to estimate the 24-hour  
5 urinary excretion of sodium chloride.<sup>9</sup> Point of care glucometers (One touch ultra-easy,  
6 Johnson & Johnson) were used for capillary blood glucose estimation in the fasting stage. A  
7 minimum of eight hours fasting was ensured in all study participants. The blood glucose  
8 measurement in mg/dl was noted and recorded.  
9

### 10 **Administration of questionnaire and recording of study measurements**

11  
12 Computer tablets with custom-made data entry forms, with display both in English and  
13 Malayalam (local language), were prepared in Open Data Kit (ODK) software were used for  
14 data collection. ODK is a freely available Open Source Software, and we have integrated a  
15 utility to run KISH method<sup>4</sup> for selection of participants in the data entry form for the STEPS  
16 survey in it. Thirty-four pairs of trained nurses did the field level data collection. They carried  
17 the computer tablets, glucometer, weighing machine, stadiometer, measuring tape and the  
18 blood pressure monitors into the household. After obtaining signed informed consent from  
19 the participants on printed forms, computer tablets with internet facility was used to gather  
20 information on questionnaire and measurements, directly on to the computer tablets by the  
21 nurses. They also did random blood glucose estimation of the study participants and gave  
22 sample bottles for urine collection with instruction on how to collect the early morning  
23 samples, which were collected back in the next morning. The data gets automatically sent to  
24 the institute server (all tablets had mobile INTERNET facility) that was monitored by the  
25 district managers on a daily basis and subsequently by the state project management unit, once  
26 a week. The aggregated data was downloaded for analysis using the ODK Briefcase utility.  
27  
28  
29  
30  
31  
32  
33  
34  
35  
36  
37  
38  
39  
40  
41  
42  
43  
44  
45  
46  
47  
48  
49  
50  
51  
52  
53  
54  
55  
56  
57  
58  
59  
60

## Quality control

Two senior public health professionals, who were working as Additional Directors of in the state health services, entrusted with the overall supervision and conduct of the survey and related activities. They were helped by 28 ( two per district) middle-level district program managers. Residential training sessions with hands-on training on data collection (using computer tablets) and standard procedures for the physical and biochemical measurements were conducted for the 34 pairs of nurses at four places (Thiruvananthapuram, Ernakulam, Thrissur and Kannur) by the same team of investigators to ensure quality and uniform standards. Data collected was checked by the district programme managers for completeness, consistency, and feedback given to data collectors. The district program managers made regular concurrent and consecutive visits to the selected households to ensure quality. The time and location of the survey could be ascertained for the quality check as the geo-location were also captured. Data cleaning was also done centrally, and monthly updates were sent to the field staff to improve the quality of data collection.

## Definitions

### *Hypertension, diabetes and high salt intake*

Hypertension was defined systolic BP $\geq$ 140 mmHg or diastolic BP of  $\geq$ 90 mmHg or the person currently using antihypertensive medications(self-reported treatment).<sup>10</sup> Diabetes was defined as fasting plasma glucose of  $\geq$ 126 mg/dl or self-reported treatment for diabetes. Fasting plasma glucose in the range of 100-125 mg/dl was defined as pre-diabetes. Dysglycemia was defined as either diabetes or pre-diabetes. High salt intake was defined as  $>$ 5 gm excretion of sodium chloride in 24 hours.

### *Obesity and overweight*

Obesity was defined as a body mass index of  $\geq 30$  kg/m<sup>2</sup>, while overweight was defined as body mass index in the range of 25-29.99 kg/m<sup>2</sup>.<sup>11</sup> Waist circumference level of  $\geq 90$  cm and  $\geq 80$  cm were used to define abdominal obesity in men and women respectively.<sup>12</sup>

### *Current smoking and alcohol use*

Current Tobacco use was defined as the use of any form of tobacco within the past 30 days<sup>5</sup>, and current alcohol use was defined intake of at least one standard drink of alcohol in the past 30 days.<sup>5</sup>

### *Poor diet*

A composite diet score was developed based on weekly per person consumption of fruits and vegetables, and 24-hour dietary salt intake. To calculate the score both fruits and vegetable intake per week were divided into tertiles and then assigned a score of 1, 2 and 3 for tertile 1 to 3.

Similarly, the 24-hour sodium chloride intake was divided into tertiles and then assigned a score of 3, 2 and 1 for tertiles 1-3. All the scores were added together and then generated the total diet score (ranged from 3-9). Poor diet was defined as a dietary score in the first tertile (i.e., high salt intake and low fruits and vegetable intake).

### *Physical inactivity*

For the calculation of physical inactivity, the total time spent in physical activity during a typical week and the intensity of the physical activity assessed using the Global Physical Activity Questionnaire (GPAQ) were taken into account. Physical inactivity was defined as  $< 600$

1  
2  
3 metabolic equivalents (MET) minutes of a combination of moderate and vigorous-intensity  
4  
5 physical activity.<sup>7</sup>

#### 6 7 8 *Number of NCD risk factors*

9  
10 Tobacco use, alcohol use, obesity, abdominal obesity, hypertension, dysglycemia, poor diet,  
11  
12 and physical inactivity were counted in the calculation of the number of risk factors. The  
13  
14 proportion of individuals with zero, any one, two, and three or more risk factors were  
15  
16 estimated.  
17  
18

#### 19 20 **Statistical analyses**

21  
22 Sampling weights were derived based on the probabilities of selection at various stages of  
23  
24 sample selection. The inverse of the product of probabilities of sample selection at different  
25  
26 stages was used in sample weighting. Sampling weights were then normalised to the total  
27  
28 sample size.  
29  
30

31  
32 Means and standard errors for quantitative variables and percentages for categorical variables  
33  
34 were used to summarise data. Cluster correction was applied as variance inflation while  
35  
36 estimating standard errors and 95% confidence intervals. Statistical analyses were done using  
37  
38 the software IBM SPSS Statistics for Window version 21 (Armonk, NY, USA: IBM Corp.)  
39  
40 and STATA Statistical Software: Release 14. (College Station, TX: Stata Corp LP.)  
41  
42  
43

## 44 45 **RESULTS**

### 46 47 **Socio-demographic characteristics**

48  
49 In total 12,012 adults in the age group of 18-69 years participated in the survey with a response  
50  
51 rate of 93.8%. Nearly half (49.3%) of the participants were urban residents with more  
52  
53 females(63%) than males (Table 1). Mean age was 42.5 years (SD=14.8). Less than a quarter  
54  
55  
56  
57  
58  
59  
60

(24.3%) had education below primary school level. Only about a third (36.5%) was in the income group of below poverty line. Nearly three fourth (73.5%) were married. One of 20 participants (4.7%) was unemployed.

### **Body mass index, waist circumference and obesity**

The mean BMI was 23.6 kg/m<sup>2</sup> (SE=0.09) and 24.5 kg/m<sup>2</sup> (SE=0.08) in males and females, respectively (Table 2). Similarly, the averages of waist circumference were 86.4 cm and 86.1 cm in males and females, respectively. More females (31.7%) were overweight compared to males (28.4%)(Table 3). Obesity was twice as high in females (10.8%) compared to males (5.2%). Abdominal obesity was 72.6% among females and 39.1% among males.

### **Behavioural risk factors**

Both tobacco and alcohol use was negligible among women. However, the current use of tobacco and alcohol among males were 20.3% (95% CI 8.6 to 22.1) and 28.9% (95% CI 26.5 to 31.4) respectively (Table 3). Physical inactivity was prevalent in 23.7% (95% CI 21.8 to 25.7) and 20.8% (95% CI 19 to 22.7) of males and females, respectively. More than three fourth of the study population (78.3%; 95% CI 76.2 to 80.1) reported consumption of <3 servings of vegetables per day. Similarly, 84.8% (95% CI 82.7 to 86.7) males and 86.5% (95% CI 84.7 to 88.1) females reported consumption of <2 servings of fruits per day. Salt consumption >5gm per day was reported by 82% (95% CI 80.5 to 83.3) females and 51.3% (95% CI 49 to 53.5) males.

### **Prevalence of hypertension and diabetes**

The average systolic BP of males was 129.4 (SE=0.4) and females 125.0 mmHg (SE=0.3) (Table 2). Similarly, the average diastolic BP was 82.5 (SE=0.3) in males and 79.7 mmHg

(SE=0.2) in females. Prevalence of hypertension in males was 34.6% (95% CI 32.6 to 36.7) and 28% (95% CI 26.4 to 29.4) in females (Table 3). Average fasting plasma glucose was 108.9 (SE=0.8) in males and 108.4 (SE=0.7) in females (Table 2). One out of five adults had Type 2 Diabetes Mellitus: 19.8% (95% CI 18.2 to 21.6) in males and 18.8% (95% CI 17.5 to 20.2) in females. Additionally, 36% (95% CI 33.7 to 38.4) of males and 35% (95% CI 32.8 to 37.0) of females were in the pre-diabetes stage. Two of five adults (40%; 95% CI 38.6 to 41.3%) had either diabetes or hypertension. Only 12.9% (95% CI 11.3 to 14.7) of persons with hypertension and 15.5% (95% CI 13.5 to 19.8) of the persons with diabetes had their diseases under control.

### **Poor diet**

On average 40.8% of participants had poor diet score (Table 3), which was higher for women(47.6%) compared to men(29.4%).

### **Clustering of NCD risk factors**

Only 9.7% (95% CI 8.5 to 11.0) of males and 5.7% (95% CI 5.0 to 6.6) of the females population were free of any of the eight NCD risk factors studied (Figure 2). Risk factors in isolation were less frequent (22.7% in males and 21.7%) as compared to co-existence with other risk factors (67.3% in males and 72.3% in females). Three or more risk factors were present in 39.8% of males and 42.5% of females. Further, four or more NCD risk factors were present in 19% of males and 17.3% of the females.

## **DISCUSSION**

This study found that almost all adults (92.8%) of 18-64 year age group in Kerala have at least one NCD risk factors and multiple risk factors were present in the majority.

1  
2  
3 Hypertension and diabetes are present in 30.4% and 19.2% of adults in Kerala. Overweight  
4 prevalence was as high as 30.4%, and twice that much (60.2%) had abdominal obesity, which  
5  
6 was more significant (72.6%) among woman. Moreover, dysglycemia (diabetes and pre-  
7  
8 diabetes together) was found to be present among 54.5% of adult population.  
9  
10

11  
12  
13 The prevalence of hypertension found in the study for Kerala is higher than the other  
14  
15 NHFS-4(2015-16) figures(16.3%) for Kerala and other states. However, the prevalence of  
16  
17 hypertension and diabetes are found to be comparable with the rates for Thiruvananthapuram  
18  
19 in 2010 by Thankappan *et al.* (28.8%)<sup>5</sup> but less than the rate by Sathish *et al.* (43.2%).<sup>13</sup> The  
20  
21 hypertension prevalence of adults in Kerala of 18-64 years is similar to the rates of urbanites  
22  
23 of higher age group (30-64 years) in Tamil Nadu (28.5%).<sup>14</sup> Hypertension rate in Kerala is  
24  
25 similar to the estimates of the meta-analysis by Anchala *et al.* for the urban south India  
26  
27 (31.8%).<sup>15</sup>  
28  
29

30  
31  
32 Prevalence of diabetes in Kerala is higher than the diabetic rate of urbanites in Delhi (18.1%).<sup>16</sup>  
33  
34 Prevalence of dysglycemia(diabetes and pre-diabetes together), in more than half (54.5%) of  
35  
36 the adult population poses a challenge to the existing health care system, to maintain the  
37  
38 diseases at the current level and to manage their complications. The increasing behavioural  
39  
40 risk factors<sup>13</sup> even among the tribal communities,<sup>17</sup> and higher conversion rate of pre-diabetes  
41  
42 to diabetes Indians<sup>18</sup> could be the reason for this much increase in diabetes.  
43  
44  
45

46  
47 Hypertension or diabetes, present in over 40% of the adult population are significant  
48  
49 contributors to cardiovascular disease mortality. Clustering of multiple risk factors, a finding  
50  
51 reported by other studies from India<sup>19</sup> increases the risk of developing a major NCD condition  
52  
53 or event in the near future. NCD risk factors are identified to be associated with the social  
54  
55  
56  
57  
58  
59  
60



1  
2  
3 disparity in India<sup>20</sup> and other Asian countries<sup>21</sup> as in the western populations.<sup>22,23</sup> The control  
4 rate for hypertension found in this study (12.8%) is low compared to the rates from Iran  
5 (49.1%),<sup>24</sup> the United States of America (48%)<sup>25</sup> and even from China (18%).<sup>26</sup> The control  
6 rate for diabetes is also low in this study (15.5%) compared to the improving rates of control  
7 found in the western countries; they could achieve 20% control even among people with  
8 hypertension and diabetes.<sup>27</sup>

9  
10 Mounting evidence on the reduction in NCD risk factors with concerted public health action  
11 in other countries<sup>28,29</sup> gives a positive impetus to the current strategy for NCD risk reduction  
12 efforts in Kerala. Hence, the policy action to address the future NCD burden should focus  
13 not only on single risk factors but also on several of them simultaneously at the population  
14 level. The cumulative effect of acting on multiple risk factors may reduce the total risk  
15 substantially and thus avert several future NCD events.

16  
17 Providing drug therapy and counselling to individuals who are at high risk of a cardiovascular  
18 event in the next ten years has been considered as a WHO 'best buy' policy option.<sup>30</sup> However,  
19 minimal implementation evidence is available from low and middle-income countries on the  
20 usefulness of such strategies in reducing the burden of NCDs.<sup>31</sup> Given the double burden of  
21 higher prevalence and poor rates of control of hypertension and diabetes in Kerala, which  
22 contradicts the success stories of implementation research in cardiovascular risk factors in  
23 Kerala,<sup>32-34</sup> the evaluation of 'best buy' interventions for cardiovascular risk reduction at the  
24 population level should be a priority for the state. Researchers should set up longitudinal or  
25 cohort studies for surveillance of NCD risk factors in Kerala so that positive strategies that

1  
2  
3 are scalable to the national level with minimum additional resources could be developed and  
4  
5 tested in Kerala.  
6

7  
8 Strengthening the primary care in Kerala and providing universal access to anti-hypertensive  
9  
10 and anti-diabetic medicines to all eligible patients should be a high priority for the Government  
11  
12 of Kerala to limit the future burden of NCDs.  
13

14  
15 The high prevalence of NCD risk factors in Kerala calls for urgent policy action for primary  
16  
17 and secondary prevention. It is high time to initiate building up of longitudinal or cohort  
18  
19 studies to capture the rate of change of NCD risk factors in the state.  
20  
21  
22  
23  
24

### 25 **Strengths and limitations of the study**

26  
27 This is a large statewide study on NCD risk factors in Kerala, done by trained nurses  
28  
29 using standard equipment, validated research tools and modern utilities like computer tablets.  
30  
31 The use of the WHO STEPS framework for the questionnaire enables comparison of studies  
32  
33 done within India and abroad.<sup>5</sup> Use of mobile data entry platforms, as we did in this study,  
34  
35 are proven to improve the quality and timeliness of STEPS surveys.<sup>5,35</sup> We had taken the third  
36  
37 reading of BP only when the difference in systolic BP of the earlier two readings<sup>8</sup> was >10  
38  
39 mmHg and that of diastolic BP >6 mmHg (third reading was taken in 18.2% of subjects),  
40  
41 which is in deviation to the WHO STEPS guidelines<sup>5</sup> that insists on taking three readings for  
42  
43 everyone. This is a limitation of this study. The biochemical measurements for serum  
44  
45 cholesterol and measurements of hip circumference could not be done in this study due to  
46  
47 logistic limitations, but they were not the core features of step 1 and step 2.<sup>36</sup> To our  
48  
49 knowledge, no other published study on NCD risk factors in Kerala in the recent past,  
50  
51  
52  
53  
54  
55  
56  
57  
58  
59  
60

1  
2  
3 including those by the same group of researchers, were done on a statewide representative  
4  
5 sample. The study is timely as the results could be used for Universal Health Coverage  
6  
7 initiative in Kerala, wherein all the peripheral hospitals are being converted to Family Health  
8  
9 Centres.  
10  
11  
12  
13  
14

## 15 **CONCLUSION**

16  
17 About 40% of adult population in Kerala have either hypertension or diabetes, and the disease  
18  
19 control rates were meagre (12.9% and 15.5% respectively). The presence of an NCD risk  
20  
21 factor in the adult population is near universal and clustering of risk factors is very common.  
22  
23 The high prevalence of NCDs and their risk factors in Kerala calls for urgent policy action for  
24  
25 secondary prevention and primary prevention.  
26  
27  
28  
29  
30  
31  
32  
33  
34  
35  
36  
37  
38  
39  
40  
41  
42  
43  
44  
45  
46  
47  
48  
49  
50  
51  
52  
53  
54  
55  
56  
57  
58  
59  
60

Table 1. General characteristics of the study population

| Variables                  | Male<br>(N=4472) | Female<br>(N=7537) | Total<br>(N=12,012)* |
|----------------------------|------------------|--------------------|----------------------|
| Age in years, mean (SD)    | 42.42(15.38)     | 42.58(14.45)       | 42.52 (14.8)         |
| Age groups, n (%)          |                  |                    |                      |
| 18-44                      | 2263(50.60)      | 4114(54.58)        | 6380(53.11)          |
| 45-69                      | 2209(49.40)      | 3423(45.42)        | 5632(46.89)          |
| Residence                  |                  |                    |                      |
| Rural                      | 2305(51.54)      | 3782(50.18)        | 6087(50.67)          |
| Urban                      | 2167(48.46)      | 3755(49.82)        | 5925(49.33)          |
| Education                  |                  |                    |                      |
| Up to primary school       | 1002(22.41)      | 1914(25.39)        | 2916(24.28)          |
| Secondary to High school   | 2281(51.01)      | 3645(48.36)        | 5928(49.35)          |
| >high school               | 1189(26.59)      | 1978(26.24)        | 3168(26.37)          |
| Social groups              |                  |                    |                      |
| Below poverty line         | 1633(36.52)      | 2796(37.10)        | 4431(36.89)          |
| Above poverty line         | 2730(61.05)      | 4555(60.44)        | 7286(60.66)          |
| Others                     | 109(2.44)        | 186(2.47)          | 295(2.46)            |
| Marital status             |                  |                    |                      |
| Never married              | 1140(25.49)      | 954(12.66)         | 2095(17.44)          |
| Married                    | 3242(72.50)      | 5579(74.02)        | 8823(73.45)          |
| Others                     | 90(2.01)         | 1004(13.32)        | 1094(9.11)           |
| Occupation                 |                  |                    |                      |
| Officers and professionals | 688(15.38)       | 536(7.11)          | 1224(10.19)          |
| Self-employed              | 1286(28.76)      | 262(3.48)          | 1549(12.90)          |
| Skilled labourer           | 703(15.72)       | 86(1.14)           | 789(6.57)            |
| Unskilled labourer         | 490(10.96)       | 232(3.08)          | 723(6.02)            |
| Unemployed                 | 413(9.24)        | 161(2.14)          | 574(4.78)            |
| Students                   | 617(13.80)       | 773(10.26)         | 1390(11.57)          |
| Others                     | 275(6.15)        | 275(2.80)          | 576(4.78)            |

\*3 participants were trans-genders

Table 2: Mean levels of risk factors (weighted means) in the study population

| Variables                            | Male (N=4472 ) |        |      | Female (N= 7537) |        |      | Total (N= 12012) |        |      |
|--------------------------------------|----------------|--------|------|------------------|--------|------|------------------|--------|------|
|                                      | n              | mean   | SE   | N                | mean   | SE   | n                | mean   | SE   |
| Body mass index in kg/m <sup>2</sup> | 4392           | 23.63  | 0.09 | 7477             | 24.48  | 0.08 | 11872            | 24.17  | 0.06 |
| Waist circumference in cm            | 4407           | 86.37  | 0.28 | 7481             | 86.13  | 0.25 | 11891            | 86.22  | 0.21 |
| Systolic blood pressure in mmHg      | 4407           | 129.41 | 0.37 | 7481             | 124.99 | 0.32 | 11891            | 126.63 | 0.26 |
| Diastolic blood pressure in mmHg     | 4407           | 82.57  | 0.26 | 7481             | 79.69  | 0.18 | 11891            | 80.76  | 0.16 |
| Plasma glucose in mg/dl              | 4299           | 108.87 | 0.82 | 7300             | 108.39 | 0.68 | 11602            | 108.57 | 0.58 |
| Salt consumption in grams/day        | 4299           | 5.33   | 0.04 | 7300             | 7.49   | 0.05 | 11599            | 6.68   | 0.45 |

SE=Standard error, cm=centi meters, kg=kilo gram, mmHg=milli meters of mercury, mg/dl=milli gram/deciliter, SE adjusted for 1387 clusters.

Table 3: Prevalence of NCD risk factors in the study population

| Variables                                                      | Male (N=4472)<br>Weighted percentage<br>and 95% CI | Female (N=7537)<br>Weighted<br>percentage and 95%<br>CI | Total (N=12012)<br>Weighted<br>percentage and 95%<br>CI |
|----------------------------------------------------------------|----------------------------------------------------|---------------------------------------------------------|---------------------------------------------------------|
| Current tobacco use                                            | 20.3 (18.6-22.1)                                   | 0.6 (0.4-0.9)                                           | 7.9 (7.3-8.7)                                           |
| Current alcohol use                                            | 28.9 (26.5-31.4)                                   | 0.2 (0.1-0.4)                                           | 8.7 (7.9-9.6)                                           |
| Physical inactivity (less<br>than 600 met minutes per<br>week) | 23.7 (21.8-25.7)                                   | 20.8 (19.0-22.8)                                        | 21.9 (20.5-23.5)                                        |
| <3 servings of vegetables<br>per day                           | 79.2 (76.7-81.5)                                   | 77.7 (75.5-79.8)                                        | 78.3 (76.2-80.1)                                        |
| <2 servings of fruits per day                                  | 83.8 (81.5-85.8)                                   | 85.3 (83.4-87.0)                                        | 84.7 (83.0-86.3)                                        |
| >=5 grams per day of salt<br>consumption                       | 51.3 (49.0-53.5)                                   | 82.0 (80.5-83.4)                                        | 70.6 (69.2-72.0)                                        |
| Poor Diet score                                                | 29.4 (27.0-32.0)                                   | 47.6 (44.9-50.4)                                        | 40.8 (38.5-43.1)                                        |
| Overweight                                                     | 28.2(26.3-30.3)                                    | 31.6 (30.0-33.3)                                        | 30.4 (29.1-31.7)                                        |
| Obesity                                                        | 5.5 (4.6-6.5)                                      | 10.9 (9.9-12.0)                                         | 8.9 (8.1-9.7)                                           |
| Abdominal obesity                                              | 39.1 (36.6-41.7)                                   | 72.6 (70.7-74.5)                                        | 60.2 (58.5-61.8)                                        |
| Hypertension                                                   | 34.6 (32.6-36.7)                                   | 27.9 (26.4-29.4)                                        | 30.4 (29.1-31.7)                                        |
| Diabetes                                                       | 19.8(18.2-21.6)                                    | 18.8 (17.5-20.2)                                        | 19.2 (18.1-20.3)                                        |
| Pre-diabetes                                                   | 36.1 (33.8-38.4)                                   | 34.9 (32.8-37.0)                                        | 35.3 (33.6-37.1)                                        |

Figure legends

Figure 1: Study sample selection flow-chart

Figure 2. Clustering of NCD risk factors in the study population

### A. Contributorship statement

Sankara Sarma contributed to the design, data analysis, data interpretation and reviewing the manuscript; Rajeev Sadanandan contributed to the concept, data interpretation and reviewing the manuscript; Jissa Vinoda Thulaseedharan contributed to the design, data analysis, drafting and reviewing the manuscript; Biju Soman contributed to the design, data acquisition, data analysis, data interpretation, drafting and reviewing the manuscript; K Srinivasan contributed to the design, data interpretation and reviewing the manuscript; Ravi Prasad Varma contributed to the design, data analysis, data interpretation and reviewing the manuscript, Manju R Nair contributed to the design, data analysis, data interpretation and reviewing the manuscript; AS Pradeepkumar contributed to the design, data acquisition, data analysis, data interpretation and reviewing the manuscript; Panniyammakal Jeemon contributed to the data analysis and data interpretation, drafting and reviewing the manuscript; KR Thankappan contributed to the concept, data acquisition, data interpretation and reviewing the manuscript; V Raman Kutty contributed to the concept, data interpretation and reviewing the manuscript

### B. Competing interest

We declare that there were no competing interests.

### C. Data Sharing statement

This is the first paper from the research work. We are still working on the data, and the data will be made available soon. Meanwhile, we shall share the data on request for legitimate use.

1  
2  
3 REFERENCE  
4  
5

- 6 1. India State-Level Disease Burden Initiative Collaborators. Nations within a nation: variations in  
7 epidemiological transition across the states of India, 1990-2016 in the Global Burden of Disease  
8 Study. *Lancet* 2017;390(10111):2437-60. doi: 10.1016/S0140-6736(17)32804-0  
9
- 10 2. ICMR, PHFI, IHME. India: Health of the Nation's States-The India State-Level Disease Burden Initiative.  
11 New Delhi, 2017.  
12
- 13 3. Census (2011), Primary Census abstracts. Office of the Registrar General & Census Commissioner, India:  
14 Ministry of Home Affairs, Government of India, 2011.  
15
- 16 4. Kish L. A Procedure for Objective Respondent Selection within the Household. *Journal of the American*  
17 *Statistical Association* 1949;44(247):380-87. doi: 10.1080/01621459.1949.10483314  
18
- 19 5. World Health Organization. NCDs | STEPS Manual. WHO. 20017.  
20 <http://www.who.int/ncds/surveillance/steps/manual/en/> (accessed 9 Nov 2018).  
21  
22
- 23 6. Thankappan KR, Shah B, Mathur P, *et al.* Risk factor profile for chronic non-communicable diseases:  
24 results of a community-based study in Kerala, India. *Indian J Med Res* 2010;131:53-63.  
25
- 26 7. WHO. Department of Chronic Diseases and Health Promotion/Surveillance and Population-Based  
27 Prevention/World Health Organization. Global Physical Activity Questionnaire (GPAQ). Geneva  
28 2002.  
29
- 30 8. National High Blood Pressure Education Program. The Seventh Report of the Joint National Committee  
31 on Prevention, Detection, Evaluation, and Treatment of High Blood Pressure. Bethesda (MD)::  
32 National Heart, Lung, and Blood Institute (US) 2004.  
33 <http://www.ncbi.nlm.nih.gov/books/NBK9630/> (accessed 9 Nov 2018).  
34  
35
- 36 9. Kawasaki T, Itoh K, Uezono K, *et al.* A simple method for estimating 24 h urinary sodium and potassium  
37 excretion from second-morning voiding urine specimen in adults. *Clin Exp Pharmacol Physiol*  
38 1993;20(1):7-14.  
39
- 40 10. James PA, Oparil S, Carter BL, *et al.* 2014 evidence-based guideline for the management of high blood  
41 pressure in adults: report from the panel members appointed to the Eighth Joint National  
42 Committee (JNC 8). *JAMA* 2014;311(5):507-20. doi: 10.1001/jama.2013.284427  
43  
44
- 45 11. WHO. Obesity: preventing and managing the global epidemic. World Health Organization. Geneva.  
46 2000  
47  
48
- 49 12. Alberti KG, Zimmet P, Shaw J. Metabolic syndrome--a new world-wide definition. A Consensus  
50 Statement from the International Diabetes Federation. *Diabet Med* 2006;23(5):469-80. doi:  
51 10.1111/j.1464-5491.2006.01858.x  
52  
53  
54  
55  
56  
57  
58  
59



13. Sathish T, Kannan S, Sarma SP, *et al.* Seven-year longitudinal change in risk factors for non-communicable diseases in rural Kerala, India: The WHO STEPS approach. *PLOS ONE* 2017;12:e0178949. doi:10.1371/journal.pone.0178949
14. Oommen AM, Abraham VJ, George K, *et al.* Prevalence of risk factors for non-communicable diseases in rural & urban Tamil Nadu. *Indian J Med Res* 2016;144:460–71. doi:10.4103/0971-5916.198668
15. Anchala R, Kannuri NK, Pant H, *et al.* Hypertension in India: a systematic review and meta-analysis of prevalence, awareness, and control of hypertension. *J Hypertens* 2014;32:1170–7. doi:10.1097/HJH.0000000000000146
16. Garg A, Anand T, Sharma U, *et al.* Prevalence of Risk Factors for Chronic Non-communicable Diseases Using WHO Steps Approach in an Adult Population in Delhi. *J Family Med Prim Care* 2014;3:112–8. doi:10.4103/2249-4863.137617
17. Sajeev P, Soman B. Prevalence of noncommunicable disease risk factors among the Kani tribe in Thiruvananthapuram district, Kerala. *Indian Heart Journal* 2018;70:598–603. doi:10.1016/j.ihj.2018.01.022
18. Mohan V, Deepa M, Anjana RM, *et al.* Incidence of diabetes and pre-diabetes in a selected urban south Indian population (CUPS-19). *J Assoc Physicians India* 2008;56:152-7.
19. Jeemon P, Prabhakaran D, Goenka S, *et al.* Impact of comprehensive cardiovascular risk reduction programme on risk factor clustering associated with elevated blood pressure in an Indian industrial population. *Indian J Med Res* 2012;135(4):485-93.
20. Reddy KS, Prabhakaran D, Jeemon P, *et al.* Educational status and cardiovascular risk profile in Indians. *Proc Natl Acad Sci USA* 2007;104:16263–8. doi:10.1073/pnas.0700933104
21. Kim YJ, Lee JS, Park J, *et al.* Trends in socioeconomic inequalities in five major risk factors for cardiovascular disease in the Korean population: a cross-sectional study using data from the Korea National Health and Nutrition Examination Survey, 2001–2014. *BMJ Open* 2017;7:e014070. doi:10.1136/bmjopen-2016-014070
22. Tracey ML, Fitzgerald S, Geaney F, *et al.* Socioeconomic inequalities of cardiovascular risk factors among manufacturing employees in the Republic of Ireland: A cross-sectional study. *Preventive Medicine Reports* 2015;2:699–703. doi:10.1016/j.pmedr.2015.08.003
23. Psaltopoulou T, Hatzis G, Papageorgiou N, *et al.* Socioeconomic status and risk factors for cardiovascular disease: Impact of dietary mediators. *Hellenic Journal of Cardiology* 2017;58:32–42. doi:10.1016/j.hjc.2017.01.022
24. Jahangiry L, Ghanbari J, Abbasalizad Farhangi M, *et al.* Predictors of poor blood pressure control among Iranian hypertensive patients. *BMC Res Notes* 2017;10. doi:10.1186/s13104-017-2971-4
25. Gillespie CD, Hurvitz KA, Centers for Disease Control and Prevention (CDC). Prevalence of hypertension and controlled hypertension - United States, 2007-2010. *MMWR supplements* 2013;62:144–8.

- 1  
2  
3 26. Xu D, Chen W, Li X, *et al.* Factors Associated with Blood Pressure Control in Hypertensive Patients with  
4 Coronary Heart Disease: Evidence from the Chinese Cholesterol Education Program. *PLoS One*  
5 2013;8. doi:10.1371/journal.pone.0063135  
6
- 7  
8 27. Song Y, Liu X, Zhu X, *et al.* Increasing trend of diabetes combined with hypertension or  
9 hypercholesterolemia: NHANES data analysis 1999–2012. *Sci Rep* 2016;6. doi:10.1038/srep36093  
10
- 11 28. Ghannem HB. 103: Challenges of Preventing Non-Communicable Diseases Risk Factors in Urban  
12 Context in Tunisia. *BMJ Open* 2015;5:BMJ open-2015-forum2015abstracts.103.  
13 doi:10.1136/bmjopen-2015-forum2015abstracts.103  
14
- 15 29. Pullar J, Allen L, Townsend N, *et al.* The impact of poverty reduction and development interventions  
16 on non-communicable diseases and their behavioural risk factors in low and lower-middle  
17 income countries: A systematic review. *PLOS ONE* 2018;13:e0193378.  
18 doi:10.1371/journal.pone.0193378  
19
- 20 30. Hunter DJ, Reddy KS. Noncommunicable diseases. *N Engl J Med* 2013;369(14):1336-43. doi:  
21 10.1056/NEJMra1109345  
22
- 23 31. Allen LN, Pullar J, Wickramasinghe KK, *et al.* Evaluation of research on interventions aligned to WHO  
24 'Best Buys' for NCDs in low-income and lower-middle-income countries: a systematic review from  
25 1990 to 2015. *BMJ Glob Health* 2018;3(1):e000535. doi: 10.1136/bmjgh-2017-000535  
26
- 27 32. Daivadanam M, Absetz P, Sathish T, *et al.* Lifestyle change in Kerala, India: needs assessment and  
28 planning for a community-based diabetes prevention trial. *BMC Public Health* 2013;13:95.  
29 doi:10.1186/1471-2458-13-95  
30
- 31 33. Thankappan KR, Daivadanam M, Sarma P, *et al.* Smoking cessation among diabetes patients: results  
32 of a pilot randomised controlled trial in Kerala, India. *BMC Public Health* 2013;13:47.  
33 doi:10.1186/1471-2458-13-47  
34
- 35 34. Mathews E, Thomas E, Absetz P, *et al.* Cultural adaptation of a peer-led lifestyle intervention program  
36 for diabetes prevention in India: the Kerala diabetes prevention program (K-DPP). *BMC Public*  
37 *Health* 2018;17:974. doi:10.1186/s12889-017-4986-0  
38
- 39 35. Thakur J, Jeet G, Tripathy J. m-STEPS: Developing and implementing a smart innovative android tool  
40 for noncommunicable disease risk factor (STEPS) survey in India. *International Journal of*  
41 *Noncommunicable Diseases* 2016;1:91. doi:10.4103/2468-8827.192018  
42
- 43 36. Riley L, Guthold R, Cowan M, *et al.* The World Health Organization STEPwise Approach to  
44 Noncommunicable Disease Risk-Factor Surveillance: Methods, Challenges, and Opportunities. *Am*  
45 *J Public Health* 2016;106:74–8. doi:10.2105/AJPH.2015.302962  
46  
47  
48  
49  
50  
51  
52  
53  
54  
55  
56  
57  
58  
59

1  
2  
3 FUNDING

4 Financial support for this survey was met from the grant given by the Government of Kerala to  
5 Sree Chitra Tirunal Institute for Medical Sciences & Technology (G.O.(Rt.) No.  
6 609/2016/H&FWD dated 24/02/2016) for the Prevention and Control of Non-communicable  
7 diseases in Kerala.  
8  
9  
10  
11  
12  
13  
14  
15  
16  
17  
18  
19  
20  
21  
22  
23  
24  
25  
26  
27  
28  
29  
30  
31  
32  
33  
34  
35  
36  
37  
38  
39  
40  
41  
42  
43  
44  
45  
46  
47  
48  
49  
50  
51  
52  
53  
54  
55  
56  
57  
58  
59  
60

For peer review only

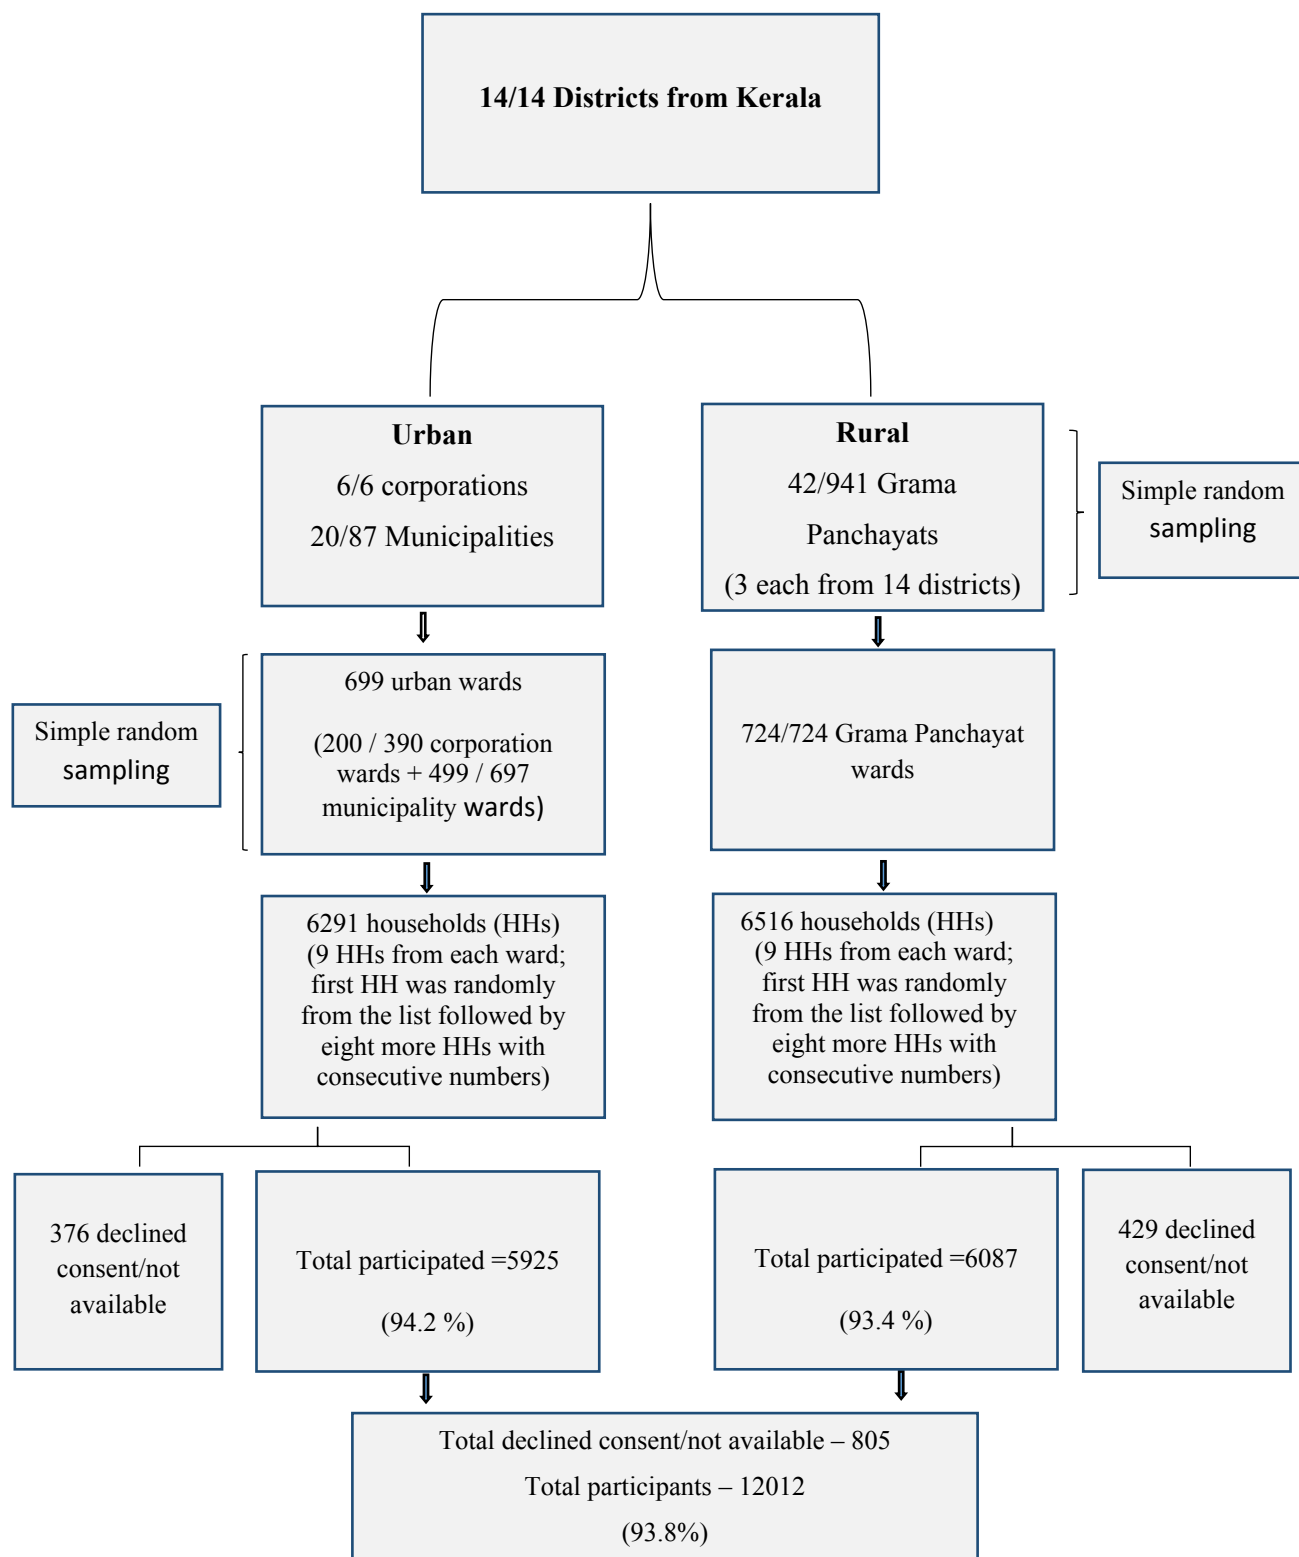

1  
2  
3  
4  
5  
6  
7  
8  
9  
10  
11  
12  
13  
14  
15  
16  
17  
18  
19  
20  
21  
22  
23  
24  
25  
26  
27  
28  
29  
30  
31  
32  
33  
34  
35  
36  
37  
38  
39  
40  
41  
42  
43  
44  
45  
46  
47  
48  
49  
50  
51  
52  
53  
54  
55  
56  
57  
58  
59  
60

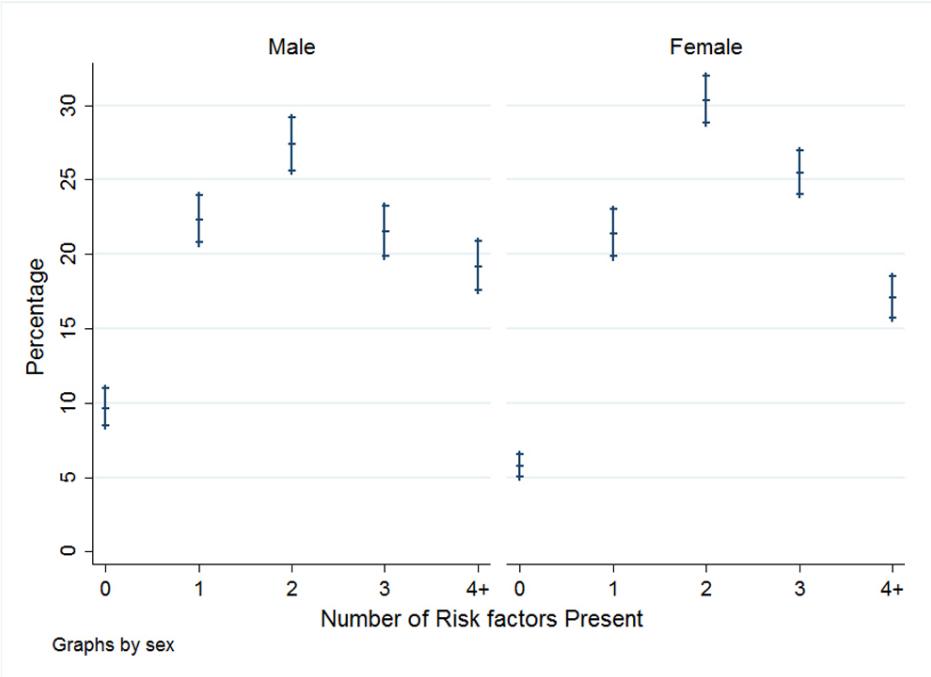

Figure 2. Clustering of NCD risk factors in the study population

90x90mm (300 x 300 DPI)

**STROBE 2007 (v4) Statement—Checklist of items that should be included in reports of *cross-sectional studies***

| Section/Topic                | Item # | Recommendation                                                                                                                                                                       | Reported on page # |
|------------------------------|--------|--------------------------------------------------------------------------------------------------------------------------------------------------------------------------------------|--------------------|
| <b>Title and abstract</b>    | 1      | (a) Indicate the study's design with a commonly used term in the title or the abstract                                                                                               | 2                  |
|                              |        | (b) Provide in the abstract an informative and balanced summary of what was done and what was found                                                                                  | 2                  |
| <b>Introduction</b>          |        |                                                                                                                                                                                      |                    |
| Background/rationale         | 2      | Explain the scientific background and rationale for the investigation being reported                                                                                                 | 4                  |
| Objectives                   | 3      | State specific objectives, including any prespecified hypotheses                                                                                                                     | 4                  |
| <b>Methods</b>               |        |                                                                                                                                                                                      |                    |
| Study design                 | 4      | Present key elements of study design early in the paper                                                                                                                              | 4                  |
| Setting                      | 5      | Describe the setting, locations, and relevant dates, including periods of recruitment, exposure, follow-up, and data collection                                                      | 4                  |
| Participants                 | 6      | (a) Give the eligibility criteria, and the sources and methods of selection of participants                                                                                          | 5-6                |
| Variables                    | 7      | Clearly define all outcomes, exposures, predictors, potential confounders, and effect modifiers. Give diagnostic criteria, if applicable                                             | 6-8                |
| Data sources/<br>measurement | 8*     | For each variable of interest, give sources of data and details of methods of assessment (measurement). Describe comparability of assessment methods if there is more than one group | 6-8                |
| Bias                         | 9      | Describe any efforts to address potential sources of bias                                                                                                                            | 9                  |
| Study size                   | 10     | Explain how the study size was arrived at                                                                                                                                            | 5                  |
| Quantitative variables       | 11     | Explain how quantitative variables were handled in the analyses. If applicable, describe which groupings were chosen and why                                                         | 9-11               |
| Statistical methods          | 12     | (a) Describe all statistical methods, including those used to control for confounding                                                                                                | 11                 |
|                              |        | (b) Describe any methods used to examine subgroups and interactions                                                                                                                  | 11                 |
|                              |        | (c) Explain how missing data were addressed                                                                                                                                          | 11                 |
|                              |        | (d) If applicable, describe analytical methods taking account of sampling strategy                                                                                                   | 11                 |
|                              |        | (e) Describe any sensitivity analyses                                                                                                                                                | 11                 |
| <b>Results</b>               |        |                                                                                                                                                                                      | 12-14              |

|                          |     |                                                                                                                                                                                                              |              |
|--------------------------|-----|--------------------------------------------------------------------------------------------------------------------------------------------------------------------------------------------------------------|--------------|
| Participants             | 13* | (a) Report numbers of individuals at each stage of study—eg numbers potentially eligible, examined for eligibility, confirmed eligible, included in the study, completing follow-up, and analysed            | 12, Figure 1 |
|                          |     | (b) Give reasons for non-participation at each stage                                                                                                                                                         | NA           |
|                          |     | (c) Consider use of a flow diagram                                                                                                                                                                           | Figure 1     |
| Descriptive data         | 14* | (a) Give characteristics of study participants (eg demographic, clinical, social) and information on exposures and potential confounders                                                                     | 12           |
|                          |     | (b) Indicate number of participants with missing data for each variable of interest                                                                                                                          | 12           |
| Outcome data             | 15* | Report numbers of outcome events or summary measures                                                                                                                                                         | 12-14        |
| Main results             | 16  | (a) Give unadjusted estimates and, if applicable, confounder-adjusted estimates and their precision (eg, 95% confidence interval). Make clear which confounders were adjusted for and why they were included | 12-14        |
|                          |     | (b) Report category boundaries when continuous variables were categorized                                                                                                                                    | 12-14        |
|                          |     | (c) If relevant, consider translating estimates of relative risk into absolute risk for a meaningful time period                                                                                             | NA           |
| Other analyses           | 17  | Report other analyses done—eg analyses of subgroups and interactions, and sensitivity analyses                                                                                                               | NA           |
| <b>Discussion</b>        |     |                                                                                                                                                                                                              |              |
| Key results              | 18  | Summarise key results with reference to study objectives                                                                                                                                                     | 14           |
| Limitations              | 19  | Discuss limitations of the study, taking into account sources of potential bias or imprecision. Discuss both direction and magnitude of any potential bias                                                   | 16           |
| Interpretation           | 20  | Give a cautious overall interpretation of results considering objectives, limitations, multiplicity of analyses, results from similar studies, and other relevant evidence                                   | 14-16        |
| Generalisability         | 21  | Discuss the generalisability (external validity) of the study results                                                                                                                                        | 16           |
| <b>Other information</b> |     |                                                                                                                                                                                                              |              |
| Funding                  | 22  | Give the source of funding and the role of the funders for the present study and, if applicable, for the original study on which the present article is based                                                | 25           |

\*Give information separately for cases and controls in case-control studies and, if applicable, for exposed and unexposed groups in cohort and cross-sectional studies.

**Note:** An Explanation and Elaboration article discusses each checklist item and gives methodological background and published examples of transparent reporting. The STROBE checklist is best used in conjunction with this article (freely available on the Web sites of PLoS Medicine at <http://www.plosmedicine.org/>, Annals of Internal Medicine at <http://www.annals.org/>, and Epidemiology at <http://www.epidem.com/>). Information on the STROBE Initiative is available at [www.strobe-statement.org](http://www.strobe-statement.org).

# BMJ Open

## Prevalence of risk factors of non-communicable diseases in Kerala, India; results of a cross-sectional study

|                                 |                                                                                                                                                                                                                                                                                                                                                                                                                                                                                                                                                                                                                                                                                                                                                                                                                                                                                                                                                                                                                                                                                                                                                                                                                                                                                                                                                                                                                                                                                                         |
|---------------------------------|---------------------------------------------------------------------------------------------------------------------------------------------------------------------------------------------------------------------------------------------------------------------------------------------------------------------------------------------------------------------------------------------------------------------------------------------------------------------------------------------------------------------------------------------------------------------------------------------------------------------------------------------------------------------------------------------------------------------------------------------------------------------------------------------------------------------------------------------------------------------------------------------------------------------------------------------------------------------------------------------------------------------------------------------------------------------------------------------------------------------------------------------------------------------------------------------------------------------------------------------------------------------------------------------------------------------------------------------------------------------------------------------------------------------------------------------------------------------------------------------------------|
| Journal:                        | <i>BMJ Open</i>                                                                                                                                                                                                                                                                                                                                                                                                                                                                                                                                                                                                                                                                                                                                                                                                                                                                                                                                                                                                                                                                                                                                                                                                                                                                                                                                                                                                                                                                                         |
| Manuscript ID                   | bmjopen-2018-027880.R1                                                                                                                                                                                                                                                                                                                                                                                                                                                                                                                                                                                                                                                                                                                                                                                                                                                                                                                                                                                                                                                                                                                                                                                                                                                                                                                                                                                                                                                                                  |
| Article Type:                   | Original research                                                                                                                                                                                                                                                                                                                                                                                                                                                                                                                                                                                                                                                                                                                                                                                                                                                                                                                                                                                                                                                                                                                                                                                                                                                                                                                                                                                                                                                                                       |
| Date Submitted by the Author:   | 17-Jun-2019                                                                                                                                                                                                                                                                                                                                                                                                                                                                                                                                                                                                                                                                                                                                                                                                                                                                                                                                                                                                                                                                                                                                                                                                                                                                                                                                                                                                                                                                                             |
| Complete List of Authors:       | <p>Sarma, P; Sree Chitra Tirunal Institute for Medical Sciences and Technology, Achutha Menon Centre for Health Science Studies<br/>Sadanandan, Rajeev; Government of Kerala, Department of Health &amp; Family Welfare<br/>Thulaseedharan, Jissa Vinoda; Sree Chitra Tirunal Institute for Medical Sciences and Technology, Achutha Menon Centre for Health Science Studies<br/>Soman, Biju; Sree Chitra Tirunal Institute for Medical Sciences and Technology, Achutha Menon Centre for Health Science Studies<br/>Srinivasan, Kannan; Sree Chitra Tirunal Institute for Medical Sciences and Technology, Achutha Menon Centre for Health Science Studies<br/>Varma, R; Sree Chitra Tirunal Institute for Medical Sciences and Technology, Achutha Menon Centre for Health Science Studies<br/>Nair, Manju; Sree Chitra Tirunal Institute for Medical Sciences and Technology, Achutha Menon Centre for Health Science Studies<br/>Pradeepkumar, AS; Sree Chitra Tirunal Institute for Medical Sciences and Technology, Achutha Menon Centre for Health Science Studies<br/>Jeemon, Panniyammakal; Sree Chitra Tirunal Institute for Medical Sciences and Technology, Achutha Menon Centre for Health Science Studies<br/>Thankappan, KR; Sree Chitra Tirunal Institute for Medical Sciences and Technology, Achutha Menon Centre for Health Science Studies<br/>Kutty, Raman; Sree Chitra Tirunal Institute for Medical Sciences and Technology, Achutha Menon Centre for Health Science Studies</p> |
| <b>Primary Subject Heading</b>: | Public health                                                                                                                                                                                                                                                                                                                                                                                                                                                                                                                                                                                                                                                                                                                                                                                                                                                                                                                                                                                                                                                                                                                                                                                                                                                                                                                                                                                                                                                                                           |
| Secondary Subject Heading:      | Epidemiology, Cardiovascular medicine, Health policy                                                                                                                                                                                                                                                                                                                                                                                                                                                                                                                                                                                                                                                                                                                                                                                                                                                                                                                                                                                                                                                                                                                                                                                                                                                                                                                                                                                                                                                    |
| Keywords:                       | Prevalence, NCD risk factors, Kerala, Diabetes, Hypertension < CARDIOLOGY                                                                                                                                                                                                                                                                                                                                                                                                                                                                                                                                                                                                                                                                                                                                                                                                                                                                                                                                                                                                                                                                                                                                                                                                                                                                                                                                                                                                                               |
|                                 |                                                                                                                                                                                                                                                                                                                                                                                                                                                                                                                                                                                                                                                                                                                                                                                                                                                                                                                                                                                                                                                                                                                                                                                                                                                                                                                                                                                                                                                                                                         |

SCHOLARONE™  
Manuscripts



1  
2  
3 **Prevalence of risk factors of non-communicable diseases in Kerala, India; results of a**  
4  
5 **cross-sectional study**  
6  
7

8 Authors: P Sankara Sarma<sup>1</sup>, Rajeev Sadanandan<sup>2</sup>, Jissa Vinoda Thulaseedharan<sup>1</sup>, Biju Soman<sup>1\*</sup>,  
9 Kannan Srinivasan<sup>1</sup>, Ravi Prasad Varma<sup>1</sup>, Manju R Nair<sup>1</sup>, AS Pradeepkumar<sup>1</sup>, Panniyammakal  
10 Jeemon<sup>1</sup>, Kavumpurathu Raman Thankappan<sup>1</sup>, V Raman Kutty<sup>1</sup>  
11  
12

13 \*Corresponding author: Biju Soman, Professor, Achutha Menon Centre for Health Science  
14 Studies (AMCHSS), Sree Chitra Tirunal Institute for Medical Sciences & Technology  
15 (SCTIMST), Thiruvananthapuram, Kerala, India, PIN695011; [bijusoman@sctimst.ac.in](mailto:bijusoman@sctimst.ac.in),  
16 +91 944 786 2736  
17  
18

19  
20 Affiliations:

- 21 1. Sree Chitra Tirunal Institute for Medical Sciences and Technology, Trivandrum
  - 22 2. Department of Health and Family Welfare, Government of Kerala.
- 23  
24  
25  
26  
27

28 P Sankara Sarma, AMCHSS, SCTIMST, Thiruvananthapuram, India

29 Rajeev Sadanandan, Dept. of Health & Family Welfare, Govt. of Keala, Thiruvananthapuram,  
30 India

31 Jissa Vinoda Thulaseedharan, AMCHSS, SCTIMST, Thiruvananthapuram, India

32 K Srinivasan, AMCHSS, SCTIMST, Thiruvananthapuram, India

33 Ravi Prasad Varma, AMCHSS, SCTIMST, Thiruvananthapuram, India

34 Manju R Nair, AMCHSS, SCTIMST, Thiruvananthapuram, India

35 AS Pradeep Kumar, AMCHSS, SCTIMST, Thiruvananthapuram, India

36 Panniyammakal Jeemon, AMCHSS, SCTIMST, Thiruvananthapuram, India

37 Kavumpurathu Raman Thankappan, AMCHSS, SCTIMST, Thiruvananthapuram, India

38 V Raman Kutty, AMCHSS, SCTIMST, Thiruvananthapuram, India  
39  
40  
41  
42  
43

44 \*This work was supported by the Department of Health and Family Welfare, Government of  
45 Kerala as per its order no.GO(Rt)No.609/2016/H&FWD Dated 24/02/2016.  
46

47 Number of words: 3964  
48  
49  
50  
51  
52  
53  
54  
55  
56  
57  
58  
59  
60

## Abstract

**Objectives:** To estimate the prevalence of non-communicable disease (NCD) risk factors in Kerala.

**Design:** Community based cross-sectional survey.

**Participants:** In 2016-17 a multi-stage cluster sample of 12,012 (18-69 years) participants from all 14 districts in Kerala were studied.

**Main outcome measures:** NCD risk factors as stipulated by the World Health Organization's approach to NCD risk factors Surveillance. Parameters studied include physical activity score, anthropometry, blood pressure, and fasting blood glucose and spot urine sample to estimate dietary intake of salt.

**Results:** Mean age was 42.5 years (SD=14.8). Abdominal obesity was more in women (72.6%; 95%CI 70.7-74.5) compared to men (39.1%; 95%CI 36.6-41.7) and more in urbanites (67.4%; 95%CI 65.0-69.7) compared to rural-folk (58.6%; 95%CI 56.6-60.5). Current use of tobacco and alcohol in males were 20.3% (95% CI 18.6-22.1) and 28.9% (95% CI 26.5 to 31.4), respectively. The estimated mean salt intake(6.7 g/day) is lower than other reported figures in India. overall prevalence of raised blood pressure(BP) and raised fasting blood glucose(FBG) 30.4% (95% CI 29.1 to 31.7) and 19.2% (95% CI 18.1 to 20.3) respectively. Raised BP was more in men (34.6%, 95%CI 32.6-36.7) compared to women (28%; 95%CI 26.4-29.4) and not different between urbanites (33.1%; 95%CI 31.3-34.9) and rural-folk (29.8%; 95%CI 28.3-31.3). Only 12.4% of hypertensives and 15.3% of diabetics were found to keep their diseases under control. Only 13.8% of urbanites and 18.4% of rural-folk were free of the seven NCD risk factors studied.

**Conclusion:** Majority of the participants have more than one NCD risk factors. It was striking to note that there is no rural-urban difference in BP for FBG readings in Kerala. The higher rates of NCD risk factors and lower rates of disease control calls for concerted primary and secondary prevention strategies to address the future burden of NCDs.

**Keywords:** Prevalence, NCD risk factors, Kerala, diabetes, hypertension

### Strengths and limitations

- The study gives robust rates of NCD risk factors in Kerala that can be compared other studies in India and abroad, as we had used the widely validated WHO STEPS questionnaire and standard pieces of equipment to study a representative sample of adults.
- We took the third reading for blood pressure (BP) only when the difference in systolic BP of the previous two readings was  $>10$  mmHg and that of diastolic BP  $>6$  mmHg which is in deviation to the WHO STEPS guidelines that insist on taking three readings for everyone.
- The biochemical measurements for serum cholesterol and measurements of hip circumference were not done this study due to logistic limitations, but they were not the core features of step 1 and step 2.
- To our knowledge, no other study on NCD risk factors in Kerala in the recent past, including those by the same group of researchers, were done on a statewide cross-sectional study.

## INTRODUCTION

Over two third (67%) of disease burden in India measured by disability-adjusted life years (DALYs) is attributable to Non-communicable diseases (NCDs) and injuries<sup>1</sup>. The India state-level disease burden estimates suggest significant differences between states in the composition of disease burden<sup>1</sup>. Compared to other states in India, the state of Kerala is relatively in an advanced stage of epidemiological transition<sup>2</sup>. Over 90% of premature mortality in Kerala (mortality in the age group of 15-69 years) is attributable to NCDs<sup>2</sup>. Furthermore, nearly a quarter of the total disease burden in DALYs is due to four major NCDs (ischemic heart disease, stroke, chronic obstructive pulmonary diseases, and diabetes)<sup>1</sup>. The rising proportion of elders (12.6%<sup>3</sup>) and the fast adoption of sedentary lifestyles in Kerala might have contributed to this much increase in non-communicable diseases.<sup>3</sup> Community-level interventions to bring down NCD risk factors are being undertaken by the state government which is a definite indication of the gravity of the situation as mentioned in the government order (GO(Rt)No.609/2016/H&FWD Dated 24/02/2016 by Govt. of Kerala).

While the disease burden estimates based on modelling of available data are useful in planning resource allocation, strategic investments in prevention and management of NCDs require accurate appraisals of their prevalence and risk factors. Hence we conducted a cross-sectional survey in Kerala's 14 districts using a multi-stage cluster sampling strategy to identify a representative sample of eligible participants. The objective of this paper is to describe the current prevalence of NCD risk factors in Kerala.

## METHODS

## Study settings

The state of Kerala, in South India, has a population of 33.4 million<sup>4</sup> and an area of 38,863 square kilometres. Nearly half the population is urban. A cross-sectional survey was conducted in all the 14 districts of Kerala, in both rural and urban areas from October 2016 to March 2017.

## Sampling

A minimum sample size of 12000 adults was considered to provide separate prevalence estimates in different strata (for example; among male/female and urban/rural residents), of various NCD risk factors with an expected prevalence of 5% (based on the physical inactivity rate of men in rural area (4.7%) in our previous study)<sup>5</sup>, and relative precision of 20%. We also considered a design effect of 1.5 and a response rate of 90% in the sample size estimation.

A multi-stage cluster sampling strategy was adopted to identify a representative sample of eligible participants for the cross-sectional survey (Fig 1). The primary sampling units were a well-defined geographical area administered by the local government institution, i.e., municipal corporations and municipalities in urban areas and Grama Panchayats (GPs) - Grass-root level elected governments in the rural areas. The population of GPs in Kerala is around 20000-40000, whereas those in other states are around 1000-4000. In most districts, data were collected from two urban and three rural sites except in two districts, which had only one urban site each. The survey was conducted in all the municipal corporations (n=6) and randomly selected 20 of 87 municipalities in the urban region. Similarly, three GPs were randomly selected from each district (42 GPs from 14 districts).

1  
2  
3 Each of the primary sampling units is further divided into wards. In the next stage of sampling,  
4  
5 a total 200 of the 390 wards of the municipal corporations and 499 of the 697 wards of the  
6  
7 selected municipalities were randomly selected for the survey. All the 724 wards of selected  
8  
9 GPs were also selected. In the final stage of sampling, one cluster of nine households were  
10  
11 identified from each ward. For the selection of a cluster of households, one household was  
12  
13 identified randomly from the available list of all the households in the selected ward and  
14  
15 followed by the selection of eight more households with consecutive house numbers.  
16  
17  
18  
19

### 20 **Study participants**

21  
22 All the individuals between the age group of 18-69 years were eligible to be part of the survey.  
23  
24 If there were more than one adult in this age group, KISH method<sup>6</sup> was used to identify one  
25  
26 of them from the household. Pregnant women were excluded from physical and biochemical  
27  
28 measurements.  
29  
30  
31

### 32 **Ethical considerations**

33  
34 All participants of the study have given written informed consent. The Institutional Ethics  
35  
36 Committee of SCTIMST, Trivandrum formally approved the conduct of the study  
37  
38 (SCT/IEC/902/MAY-2016 dated 11/05/2016).  
39  
40  
41

### 42 **Patient and public involvement**

43  
44 No patients or public were directly involved in the study. We thank the project team,  
45  
46 comprising two senior consultants, 28 district-level managers, 68 nurses and two office staff  
47  
48 for their untiring efforts. Authors thank the Department of Health Services, Government of  
49  
50 Kerala for patronising the survey, allowing the district level project staff to use their facilities  
51  
52 and above all for the field level facilitative supervision. We also thank the DDRC SRL  
53  
54  
55  
56  
57  
58  
59  
60

1  
2  
3 Diagnostics Pvt. Ltd for their support. Finally, we thank all the people of Kerala, particularly  
4  
5 the study participants for their wholehearted support for the statewide survey. We shall be  
6  
7 disseminating the study results to the public in due course.  
8  
9

## 10 **Study measurements**

### 11 *Interview Schedule*

12  
13 A structured interview schedule based on the WHO STEPwise approach to NCD risk factors  
14  
15 Surveillance (STEPS)<sup>7</sup>, which was validated in Malayalam<sup>5</sup> was used for this survey.  
16  
17 Awareness of diabetes and hypertension status was assessed by asking questions about past  
18  
19 diagnosis and history of both conditions. Global physical activity questionnaire (GPAQ) was  
20  
21 used to assess physical activity levels<sup>8</sup>.  
22  
23  
24  
25  
26

### 27 *Anthropometric measurements*

28  
29 Physical and clinical measurements included height, weight, waist circumference, blood  
30  
31 pressure, and heart rate. All the measurements were taken in the participant's household by  
32  
33 trained nurses. Height was measured using a SECA 213 stand-alone stadiometer in  
34  
35 centimetres. Weight was measured using a portable SECA 803 battery operated electronic  
36  
37 weighing scale in kilograms. Both measurements were taken with the participants wearing no  
38  
39 footwear and any heavy objects in their body, such as mobile phones, wallets, and heavy belts.  
40  
41 Additionally, SECA 201 ergonomic retractable tape was used to measure waist circumference.  
42  
43 In order to measure waist circumference, the lower palpable margin of the ribs and the upper  
44  
45 margin of the iliac crest were identified initially and then marked the midpoints between these  
46  
47 margins along the mid-axillary line on both sides. The measurement tape was then wrapped  
48  
49 horizontally all around by connecting the marked points on both sides of the participant's  
50  
51  
52  
53  
54  
55  
56  
57  
58  
59  
60

1  
2  
3 body. Height was noted to the nearest 0.5 cm, weight to the nearest 10 gm and waist  
4  
5 circumference to the nearest 0.1 cm at the end of the normal expiration.  
6  
7

#### 8 *Measurement of blood pressure and pulse rate*

9

10  
11 The blood pressure(BP) and pulse rate were measured using standard battery operated  
12  
13 automatic BP monitors (OMRON HEM-7120). Before measurement, the participants were  
14  
15 seated comfortably in a relaxed upright position for at least five minutes. Appropriate size cuff  
16  
17 was used to take two readings of blood pressure and pulse rate three minutes apart.<sup>9</sup> The  
18  
19 machine was switched off between the readings, after recording the systolic BP and diastolic  
20  
21 BP in mm Hg and the heart rate in beats/minute. If systolic BP readings varied more than ten  
22  
23 mmHg or diastolic BP readings more than six mmHg, between the two initial measurements,  
24  
25 then a third reading was taken. The mean of the last two readings of blood pressure was  
26  
27 considered as the final BP.  
28  
29  
30  
31  
32

#### 33 *Biochemical measurements*

34

35  
36 Sample bottles were given to the participants on the survey day, and they were instructed to  
37  
38 collect 20 ml of the second voiding urine sample (after first voiding in the morning and before  
39  
40 breakfast) on the day of the blood sample collection for glucose estimation. Urinary sodium  
41  
42 was assessed using indirect ion-selective electrode method in an accredited central laboratory.  
43  
44 Modified Kawasaki formulae were used to estimate the 24-hour urinary intake of sodium,<sup>10</sup>  
45  
46 and it was multiplied by 2.54 to estimate daily salt (sodium chloride) intake as advocated by  
47  
48 Johnson et al.<sup>11,12</sup> Point of care glucometers (One touch ultra-easy, Johnson & Johnson) were  
49  
50 used for capillary blood glucose estimation in the fasting stage. A minimum of eight hours of  
51  
52  
53  
54  
55  
56  
57  
58  
59  
60



1  
2  
3 fasting was ensured in all study participants. The blood glucose measurement in mg/dl was  
4  
5 noted and recorded.  
6

### 7 **Administration of questionnaire and recording of study measurements**

8  
9  
10 Computer tablets with custom-made data entry forms, with display both in English and  
11  
12 Malayalam (local language), were prepared in Open Data Kit (ODK) software were used for  
13  
14 data collection. ODK is a freely available Open Source Software, and we have integrated a  
15  
16 utility to run KISH method<sup>6</sup> for selection of participants in the data entry form for the STEPS  
17  
18 survey in it. Thirty-four pairs of trained nurses did the field level data collection. They carried  
19  
20 the computer tablets, glucometer, weighing machine, stadiometer, measuring tape, and the  
21  
22 blood pressure monitors into the household. After obtaining signed informed consent from  
23  
24 the participants on printed forms, the survey team (nurses) used computer tablets with internet  
25  
26 facility to gather information on questionnaire and measurements. They also did random  
27  
28 blood glucose estimation of the study participants and gave sample bottles for urine collection  
29  
30 with instruction on how to collect the early morning samples, which were collected back in  
31  
32 the next morning. The data gets automatically sent to the institute server (all tablets had mobile  
33  
34 internet facility) that was monitored by the district managers daily and subsequently by the  
35  
36 state project management unit, once a week. The aggregated data was downloaded for analysis  
37  
38 using the ODK Briefcase utility.  
39  
40  
41  
42  
43  
44  
45

### 46 **Quality control**

47  
48  
49 Two senior public health professionals, with vast experience in the conduct of state-level  
50  
51 programs, were entrusted with the field level supervision and monitoring. They were helped  
52  
53 by 28 ( two per district) middle-level district program managers. Residential training sessions  
54  
55  
56  
57  
58  
59  
60

1  
2  
3 with hands-on training on data collection (using computer tablets) and standard procedures  
4  
5 for the physical and biochemical measurements were conducted for the 34 pairs of nurses at  
6  
7 four places (Thiruvananthapuram, Ernakulam, Thrissur, and Kannur) by the same team of  
8  
9 investigators to ensure quality and uniform standards. Data collected was checked by the  
10  
11 district program managers for completeness, consistency, and feedback given to data  
12  
13 collectors. The district program managers made regular concurrent and consecutive visits to  
14  
15 the selected households to ensure quality. The time and location of the survey could be  
16  
17 ascertained for the quality check as the geo-location were also captured. Data cleaning was  
18  
19 also done centrally, and monthly updates were sent to the field staff to improve the quality of  
20  
21 data collection.  
22  
23  
24  
25  
26

## 27 **Definitions**

### 28 *Raised BP, raised FBG and daily salt intake*

29  
30 Raised blood pressure(BP) was defined systolic BP $\geq$ 140 mmHg or diastolic BP  $\geq$ 90 mmHg  
31  
32 or the person currently using antihypertensive medications(self-reported treatment).<sup>13</sup> Raised  
33  
34 fasting blood glucose(FBG) was defined as FBG of  $\geq$ 126 mg/dl or self-reported treatment  
35  
36 for diabetes. FBG in the range of 100-125 mg/dl was defined as pre-diabetes.  
37  
38  
39

### 40 *Current smoking and alcohol use*

41  
42 Current Tobacco use was defined as the use of any form of tobacco within the past 30 days<sup>7</sup>,  
43  
44 and current alcohol use was defined intake of at least one standard drink of alcohol in the past  
45  
46 30 days.<sup>7</sup>  
47  
48  
49

### 50 *Fruits and Vegetable intake*

51  
52 The mean servings of Fruits and Vegetables per day as advocated by WHO.<sup>7</sup>  
53  
54  
55  
56  
57

### *Daily salt intake*

The Kawasaki Formula was used to estimate urinary excretion of sodium from the spot urine sample and it was multiplied by 2.54 to get daily salt (sodium chloride) intake.

### *Physical inactivity*

For the calculation of physical inactivity, the total time spent in physical activity during a typical week and the intensity of the physical activity assessed using the Global Physical Activity Questionnaire (GPAQ) were taken into account. Physical inactivity was defined as <600 metabolic equivalents (MET) minutes of a combination of moderate and vigorous-intensity physical activity.<sup>8</sup>

### *Obesity and overweight*

Obesity was defined as a body mass index of  $\geq 30$  kg/m<sup>2</sup>, while overweight was defined as body mass index in the range of 25-29.99 kg/m<sup>2</sup>.<sup>14</sup> Waist circumference level of  $\geq 90$  cm and  $\geq 80$  cm were used to define abdominal obesity in men and women respectively.<sup>15</sup>

### *Number of NCD risk factors*

Seven risk factors (tobacco use, alcohol use, obesity, abdominal obesity, raised BP, raised blood glucose, and physical inactivity) were counted in the calculation of the number of risk factors. The proportion of individuals with zero, any one, two, and three or more risk factors were estimated.

### **Statistical analyses**

Sampling weights were derived based on the probabilities of selection at various stages of sample selection. The inverse of the product of probabilities of sample selection at different

1  
2  
3 stages was used in sample weighting. Sampling weights were then normalized to the total  
4  
5 sample size.  
6

7  
8 Weighted means and 95% confidence intervals (95% CI) for quantitative variables and  
9  
10 percentages and 95% CI for categorical variables were used to summarise data. Cluster  
11  
12 correction was applied as variance inflation while estimating 95% CI. Statistical analyses were  
13  
14 done using the software IBM SPSS Statistics for Window version 21 (Armonk, NY, USA:  
15  
16 IBM Corp.) and STATA Statistical Software: Release 14. (College Station, TX: Stata Corp LP.)  
17  
18  
19  
20  
21

## 22 **RESULTS**

### 23 **Socio-demographic characteristics**

24  
25 In total, 12,012 adults in the age group of 18-69 years participated in the survey with a response  
26  
27 rate of 93.8%. Nearly half (49.3%) of the participants were urban residents with more  
28  
29 females(63%) than males (Table 1). Mean age was 42.5 years (SD=14.8). The majority (75.7%)  
30  
31 have studied up to primary school level or above, and only a third (36.5%) were designated as  
32  
33 poor, earning an income below the poverty line. Nearly three fourth (73.5%) were married.  
34  
35 One of 20 participants (4.7%) was unemployed.  
36  
37  
38  
39  
40  
41

### 42 **Behavioural risk factors**

43  
44 The use of tobacco and alcohol was low in women. However, the current use of tobacco and  
45  
46 alcohol among males were 20.3% (95% CI 18.6 to 22.1) and 28.9% (95% CI 26.5 to 31.4)  
47  
48 respectively (Table 2). Physical inactivity was prevalent in 23.7% (95% CI 21.8 to 25.7) and  
49  
50 20.8% (95% CI 19.0 to 22.7) of males and females, respectively. The mean consumption of  
51  
52 fruits was only one serving per day among men, women, urbanites and rural people, and the  
53  
54  
55  
56  
57  
58  
59  
60

1  
2  
3 intake of vegetables was two servings per day across these subgroups. (Table 2) There were  
4  
5 no significant differences in the rates of alcohol, tobacco, and physical inactivity nor in the  
6  
7 consumption of fruits and vegetables among urban or rural people. (Table. 2) The mean salt  
8  
9 intake among the participants was 6.7 gm/day (95%CI 6.6-6.8). There was no rural-urban  
10  
11 difference, but females had significantly higher salt intake (7.5 gm/day; 95%CI 7.4-7.6)  
12  
13 compared to males (5.3gm/day; 95%CI 5.2-5.4). (Table 2)  
14  
15  
16  
17  
18  
19  
20  
21  
22

### 23 **Prevalence of raised BP and raised FBG**

24  
25 The weighted means systolic BP were 129.4 mmHg (95%CI 128.7-130.4) among men and  
26  
27 125.0 mmHg (95%CI 124.4-125.6) among women. (Table 3). Similarly, the average diastolic  
28  
29 BP was 82.6 mmHg (95%CI 82.1-83.1) in men and 79.7 mmHg (95%CI 79.3-80.0) in women.  
30  
31 Prevalence of raised BP was 34.6% (95% CI 32.6-36.7) in men and 28% (95% CI 26.4 to 29.4)  
32  
33 in women (Table 3). There was no rural-urban difference in systolic or diastolic BP readings.  
34  
35 Average FBG was 108.6 mg/dl, and there was no male-female nor rural-urban difference for  
36  
37 this parameter. (Table 3) Raised FBG values were seen in 19.8% (95% CI 18.2-21.6) of men  
38  
39 and 18.8% (95% CI 17.5-20.2) of women, and there was no rural-urban difference.  
40  
41 Additionally, 36% of men and 35% of women were in the pre-diabetes stage. There were no  
42  
43 rural-urban difference in the rates of raised BP, raised FBG, and two of five adults (40%;  
44  
45 95%CI 38.6-41.3%) had either raised BP or raised FBG.  
46  
47  
48  
49  
50

51  
52 Among those with a history of hypertension, only 12.3% (95%CI 10.9-14.0) had their BP values  
53  
54 under control (meaning systolic BP<140 mmHg or diastolic BP <90 mmHg). The control rate  
55  
56  
57  
58  
59

1  
2  
3 in men (7.9%; 95%CI 6.4-9.7) was less than the control rate in women (15.6%; 95%CI 13.5-18.0);  
4  
5 similarly, the control rates among rural residents (11.5%; 95%CI 9.8-13.5) were less than the  
6  
7 urban counterparts. (15.9% (95% CI 13.6-18.4).  
8  
9

10 Among those hypertensives who claimed to be under treatment, 34.1% had their BP under control  
11  
12 (28.6% in males, 36.8% in females, 37.4% in urban residents and 33.2% in rural residents); though  
13  
14 the male-female or rural-urban differences were not statistically significant.  
15  
16

17 Among those with a history of diabetes, 15.3% (95%CI 13.1-17.8) had their BS under control  
18  
19 (meaning fasting plasma glucose of <126 mg/dl) and among those who claimed to be under  
20  
21 treatment, 31.1% (95%CI 27.1-35.4) had their BS under control. There was no significant  
22  
23 male-female difference, but the urbanites were found to have better control(17.0%; 95%CI 13.9-  
24  
25 20.6) compared to rural dwellers(14.9%; 95%CI 12.3-17.9).  
26  
27  
28  
29  
30

### 31 **Body mass index, waist circumference, and obesity**

32  
33 The mean BMI was 24.2 kg/m<sup>2</sup> (95%CI 24.1-24.4) with statistically significant rise for women  
34  
35 and urbanites, though the magnitude of the difference is negligible (Table 3). The weighted  
36  
37 mean waist circumference significantly higher for urbanites (88.2 cm; 95%CI 87.6-88.8)  
38  
39 compared to rural people(85.8 cm; 95%CI 85.3-86.3)(Table 3. More urbanites were  
40  
41 overweight(33.1%) compared to rural-folk (29.8%), and obesity was more among  
42  
43 women(10.9%) compared to men (5.5%) (Table 3). Abdominal obesity was higher for  
44  
45 women(72.6%) compared to men(39.1%) and urbanites(67.4%) compared to rural-  
46  
47 folk(58.6%)(Table 3).  
48  
49  
50  
51  
52

### 53 **Clustering of NCD risk factors**

1  
2  
3 Only 9.7% (95%CI 8.5-11.0) of men and 5.7% (95% CI 5.0 to 6.6) of women were free of any  
4 of the seven NCD risk factors(Tobacco use, alcohol use, obesity, abdominal obesity, raised  
5 BP, raised blood glucose, and physical inactivity) studied (Figure 2). Proportion with an  
6 isolated risk factor (35.3%) was less frequent than those with multiple risk factors (47.1%),  
7 and this trend was true for men(27.8% vs 41.8%), women(38.5% vs 45%), rural(35.9% vs  
8 45.7%) and urban (32.7% vs 53.5%) Three or more risk factors were present in 20.9%% and  
9 four or more NCD risk factors were present in 6.5% of the participants.  
10  
11  
12  
13  
14  
15  
16  
17  
18  
19  
20  
21  
22  
23  
24

## 25 DISCUSSION

26  
27 This study found that the majority of adults (82.4%) of 18-64 year age group in Kerala  
28 have at least one NCD risk factors, and multiple risk factors were present in 47.1%. Raised  
29 BP and raised FBG were present in 30.4% and 19.2% of adults in Kerala. Overweight  
30 prevalence was as high as 30.4%, and twice that much (60.2%) had abdominal obesity, which  
31 was more significant (72.6%) among woman. Moreover, dysglycemia (raised FBG and pre-  
32 diabetes together) was found to be present among 54.5% of the adult population.  
33  
34  
35  
36  
37  
38  
39  
40  
41

42 The prevalence of hypertension was found to be comparable with the rates for  
43 Thiruvananthapuram in 2010 by Thankappan *et al.* (28.8%)<sup>5</sup> but less than the rate by Sathish  
44 *et al.* (43.2%).<sup>16</sup> The hypertension prevalence of adults in Kerala of 18-64 years is similar to  
45 the rates of urbanites of higher age group (30-64 years) in Tamil Nadu (28.5%).<sup>17</sup>  
46 Hypertension rate in Kerala is similar to the estimates of the meta-analysis by Anchala *et al.*  
47 for the urban south India (31.8%).<sup>18</sup>  
48  
49  
50  
51  
52  
53  
54  
55  
56  
57  
58  
59  
60

1  
2  
3 Prevalence of raised FBG in Kerala is higher than the diabetic rate in urban Delhi (18.1%).<sup>19</sup>  
4  
5 Prevalence of dysglycemia in more than half (54.5%) of the adult population poses a challenge  
6  
7  
8 to the existing health care system, to maintain the diseases at the current level and to manage  
9  
10 their complications. The increasing behavioural risk factors<sup>16</sup> even among the tribal  
11  
12 communities,<sup>20</sup> and higher conversion rate of pre-diabetes to diabetes Indians<sup>21</sup> could be the  
13  
14 reason for this much increase in raised FBG.  
15  
16

17  
18 There could be underreporting of some of the behavioural risk factors, especially alcohol  
19  
20 intake as much public debate is going on in the state since 2015 on curtailing the availability  
21  
22 of liquor in the state.<sup>22</sup> The weighted mean salt intake in this study(6.7 g/day) is lower  
23  
24 compared to the estimate for Delhi, Haryana, and Andhra Pradesh, reported by Johnson *et al*<sup>23</sup>  
25  
26 in 2017. The low levels could be partially due to methodological differences, as we have not  
27  
28 inflated the values for non-urinary losses of salt as done by Johnson *et al*.<sup>11</sup> Further the mean  
29  
30 salt intake was found to be more in women in Kerala (Table 3) compared to studies  
31  
32 elsewhere.<sup>11,23,24</sup> There are methodological controversies regarding use of spot urine for the  
33  
34 estimation 24 hour sodium excretion<sup>25</sup> (using Kawasaki formulae) and the apparently low  
35  
36 intake of salt in Kerala(compared to other states) needs further research as this hard evidence  
37  
38 for salt intake could be the first indication of reversal of NCD risk factors in Kerala!  
39  
40  
41  
42  
43

44  
45 Raised BP or raised FBG, present in over 40% of the adult population are significant  
46  
47 contributors to cardiovascular disease mortality. Clustering of multiple risk factors, a finding  
48  
49 reported by other studies from India<sup>26</sup> increases the risk of developing a major NCD condition  
50  
51 or event shortly. NCD risk factors are identified to be associated with the social disparity in  
52  
53 India<sup>27</sup> and other Asian countries<sup>28</sup> as in the western populations.<sup>29,30</sup> The proportion of  
54  
55  
56  
57  
58  
59  
60



1  
2  
3 known hypertensives with normal BP found in this study (12.3%) is low compared to the rates  
4  
5 from Iran (49.1%),<sup>31</sup> the United States of America (48%)<sup>32</sup> and even from China (18%).<sup>33</sup>  
6  
7 Similarly, the proportion diabetic with normal FBG values is also low in this study (15.3%)  
8  
9 compared to the improving rates of control found in the western countries; they could achieve  
10  
11 20% control even among people with hypertension and diabetes.<sup>34</sup>  
12  
13  
14

15 Mounting evidence on the reduction in NCD risk factors with concerted public health action  
16  
17 in other countries<sup>35,36</sup> gives a positive impetus to the current strategy for NCD risk reduction  
18  
19 efforts in Kerala. Hence, the policy action to address the future NCD burden should focus  
20  
21 not only on single risk factors but also on several of them simultaneously at the population  
22  
23 level. The cumulative effect of acting on multiple risk factors may reduce the total risk  
24  
25 substantially and thus avert several future NCD events.  
26  
27  
28

29 In addition to primary care, provision of drugs and lifestyle counselling highrisk individuals is  
30  
31 necessary to address the rising burden of cardiovascular events.<sup>37</sup> However, we do not have  
32  
33 enough evidence on the feasibility of such an approach in middle-income countries.<sup>38</sup>  
34  
35

36 Moreover, in Kerala, despite the high literacy rate and the success stories of implementation  
37  
38 research in cardiovascular risk factors<sup>39-41</sup>, we have the situation of higher prevalence and poor  
39  
40 control of hypertension and diabetes. Further in-depth research using qualitative methods  
41  
42 might help us to understand the stumbling blocks in implementation research  
43  
44

45 Strengthening the primary care in Kerala and providing universal access to anti-hypertensive  
46  
47 and anti-diabetic medicines to all eligible patients should be a high priority for the Government  
48  
49 of Kerala to limit the future burden of NCDs.  
50  
51  
52  
53  
54  
55  
56  
57  
58  
59  
60

1  
2  
3 The high prevalence of NCD risk factors in Kerala calls for urgent policy action for primary  
4 and secondary prevention.  
5  
6  
7  
8  
9

### 10 **Strengths and limitations of the study**

11  
12 This was a large statewide study on NCD risk factors in Kerala, done by trained nurses  
13 using standard equipment, validated research tools and modern utilities like computer tablets.  
14  
15 The use of the WHO STEPS framework for the questionnaire enables the comparison of  
16 studies done within India and abroad.<sup>7</sup> Use of mobile data entry platforms, as we did in this  
17 study, are proven to improve the quality and timeliness of STEPS surveys.<sup>7,42</sup> We had taken  
18 the third reading of BP only when the difference in systolic BP of the earlier two readings<sup>9</sup>  
19 was >10 mmHg and that of diastolic BP >6 mmHg (third reading was taken in 18.2% of  
20 subjects), which is in deviation to the WHO STEPS guidelines<sup>7</sup> that insists on taking three  
21 readings for everyone. We record this as a limitation of this study. Serum cholesterol and hip  
22 circumference measurement were not done in this study due to logistic limitations, but they  
23 were not the core features of STEP 1 and STEP 2.<sup>43</sup> To our knowledge, no other published  
24 study on NCD risk factors in Kerala in the recent past, including those by the same group of  
25 researchers, were done on a statewide scale. The study is timely as the results could be used  
26 for Universal Health Coverage initiative in Kerala, wherein all the peripheral hospitals are  
27 being converted to Family Health Centres.  
28  
29  
30  
31  
32  
33  
34  
35  
36  
37  
38  
39  
40  
41  
42  
43  
44  
45  
46  
47  
48  
49  
50

### 51 **CONCLUSION**

1  
2  
3 About 40% of the adult population in Kerala have either raised BP or raised FBG, and the  
4  
5 overall control rates for these conditions were as low as 12.3% and 15.3% respectively.  
6  
7  
8 Majority of the adult population (83.4%) had an NCD risk factor and clustering of risk factors  
9  
10 is very common. The high prevalence of NCDs and their risk factors in Kerala calls for urgent  
11  
12 policy action for prevention at all levels.  
13  
14  
15  
16  
17  
18  
19  
20  
21  
22  
23  
24  
25  
26  
27  
28  
29  
30  
31  
32  
33  
34  
35  
36  
37  
38  
39  
40  
41  
42  
43  
44  
45  
46  
47  
48  
49  
50  
51  
52  
53  
54  
55  
56  
57  
58  
59  
60

For peer review only

Table 1. General characteristics of the study population

| Variables                  | Male<br>(N=4472) | Female<br>(N=7537) | Total<br>(N=12,012)* |
|----------------------------|------------------|--------------------|----------------------|
| Age in years, mean (SD)    | 42.42(15.38)     | 42.58(14.45)       | 42.52 (14.8)         |
| Age groups, n (%)          |                  |                    |                      |
| 18-44                      | 2263(50.60)      | 4114(54.58)        | 6380(53.11)          |
| 45-69                      | 2209(49.40)      | 3423(45.42)        | 5632(46.89)          |
| Residence                  |                  |                    |                      |
| Rural                      | 2305(51.54)      | 3782(50.18)        | 6087(50.67)          |
| Urban                      | 2167(48.46)      | 3755(49.82)        | 5925(49.33)          |
| Education                  |                  |                    |                      |
| Up to primary school       | 1002(22.41)      | 1914(25.39)        | 2916(24.28)          |
| Secondary to High school   | 2281(51.01)      | 3645(48.36)        | 5928(49.35)          |
| >high school               | 1189(26.59)      | 1978(26.24)        | 3168(26.37)          |
| Social groups              |                  |                    |                      |
| Below poverty line         | 1633(36.52)      | 2796(37.10)        | 4431(36.89)          |
| Above poverty line         | 2730(61.05)      | 4555(60.44)        | 7286(60.66)          |
| Others                     | 109(2.44)        | 186(2.47)          | 295(2.46)            |
| Marital status             |                  |                    |                      |
| Never married              | 1140(25.49)      | 954(12.66)         | 2095(17.44)          |
| Married                    | 3242(72.50)      | 5579(74.02)        | 8823(73.45)          |
| Others                     | 90(2.01)         | 1004(13.32)        | 1094(9.11)           |
| Occupation                 |                  |                    |                      |
| Officers and professionals | 688(15.38)       | 536(7.11)          | 1224(10.19)          |
| Self-employed              | 1286(28.76)      | 262(3.48)          | 1549(12.90)          |
| Skilled labourer           | 703(15.72)       | 86(1.14)           | 789(6.57)            |
| Unskilled labourer         | 490(10.96)       | 232(3.08)          | 723(6.02)            |
| Unemployed                 | 413(9.24)        | 161(2.14)          | 574(4.78)            |
| Students                   | 617(13.80)       | 773(10.26)         | 1390(11.57)          |
| Others                     | 275(6.15)        | 275(2.80)          | 5763(47.98)          |

\*3 participants were trans-genders

Table.2: Prevalence of NCD risk factors in the study population

| Variables                                         | Weighted percentage and 95% CI |             | Weighted percentage and 95% CI by sex |             |                 |             | Weighted percentage and 95% CI by area of residence |             |                 |             |
|---------------------------------------------------|--------------------------------|-------------|---------------------------------------|-------------|-----------------|-------------|-----------------------------------------------------|-------------|-----------------|-------------|
|                                                   | Total (N=12012)                |             | Male (N=4472)                         |             | Female (N=7537) |             | Urban (N=6087)                                      |             | Rural (N= 5925) |             |
| Current tobacco use                               | 7.9                            | (7.2-8.7)   | 20.3                                  | (18.6-22.1) | 0.6             | (0.4-0.9)   | 7.2                                                 | (6.0-8.6)   | 8.1             | (7.2-9.0)   |
| Current alcohol use                               | 8.7                            | (7.9-9.6)   | 28.9                                  | (26.5-31.4) | 0.2             | (0.1-0.4)   | 8.9                                                 | (7.6-10.3)  | 8.7             | (7.7-9.7)   |
| Physical inactivity (< 600 MET* minutes per week) | 21.9                           | (20.4-23.5) | 23.7                                  | (21.8-25.7) | 20.8            | (19.0-22.8) | 23                                                  | (20.8-25.3) | 21.7            | (20.0-23.5) |
| Overweight                                        | 30.4                           | (29.1-31.7) | 28.2                                  | (26.2-30.3) | 31.6            | (30.0-33.3) | 33.5                                                | (31.5-35.4) | 29.7            | (28.2-31.2) |
| Obesity                                           | 8.9                            | (8.1-9.7)   | 5.5                                   | (4.6-6.5)   | 10.9            | (9.9-12.0)  | 11.2                                                | (9.9-12.7)  | 8.4             | (7.5-9.3)   |
| Abdominal obesity                                 | 60.2                           | (58.5-61.8) | 39.1                                  | (36.6-41.7) | 72.6            | (70.7-74.5) | 67.4                                                | (65.0-69.7) | 58.6            | (56.6-60.5) |
| Raised blood pressure†                            | 30.4                           | (29.1-31.7) | 34.6                                  | (32.6-36.7) | 27.9            | (26.4-29.4) | 33.1                                                | (31.3-34.9) | 29.8            | (28.3-31.3) |
| Raised FBG‡                                       | 19.2                           | (18.1-20.3) | 19.8                                  | (18.2-21.6) | 18.8            | (17.4-20.2) | 19.8                                                | (18.1-21.6) | 19              | (17.7-21.4) |
| Pre-diabetes                                      | 35.3                           | (33.6-37.1) | 36.1                                  | (33.7-38.4) | 34.9            | (32.8-37.0) | 31.7                                                | (29.6-33.9) | 36.1            | (34.0-38.2) |

\*MET = metabolic equivalents

†Numerator includes people with raised blood pressure and those who were under treatment (self-reported) for hypertension.

‡ FBG = fasting blood glucose; numerator includes people with raised fasting blood glucose values and those who were under treatment (self-reported) for diabetes.

All estimates and 95% CI were adjusted for 1387 clusters

Table.3: Mean levels of risk factors (weighted means) in the study population

| Variables                                      | Weighted mean and 95% CI |               | Weighted mean and 95% CI by sex |                  | Weighted mean and 95% CI by area of residence |                 |
|------------------------------------------------|--------------------------|---------------|---------------------------------|------------------|-----------------------------------------------|-----------------|
|                                                | Total (N= 12012)         |               | Male (N=4472 )                  | Female (N= 7537) | Urban (N=6087)                                | Rural (N= 5925) |
| Systolic BP in mmHg                            | 126.6                    | (126.1-127.1) | 129.4                           | 125              | 126.6                                         | 126.6           |
| Diastolic BP in mmHg                           | 80.8                     | (80.4-81.1)   | 82.6                            | 79.7             | 80.9                                          | 80.7            |
| FBG in mg/dl                                   | 108.6                    | (107.4-109.7) | 108.9                           | 108.4            | 108.4                                         | 108.6           |
| Fruit intake (servings/day)                    | 1.1                      | (1.0-1.1)     | 1.1                             | 1                | 1                                             | 1.1             |
| Vegetable intake (servings /day)               | 2                        | (1.9-2.1)     | 2                               | 2                | 1.9                                           | 2               |
| Mean vegetable and fruit intake (servings/day) | 1.5                      | (1.4-1.6)     | 1.5                             | 1.5              | 1.4                                           | 1.6             |
| Salt (sodium chloride) intake, (g/day)         | 6.7                      | (6.6-6.8)     | 5.3                             | 7.5              | 6.6                                           | 6.7             |
| Body mass index in kg/m <sup>2</sup>           | 24.2                     | (24.1-24.4)   | 23.6                            | 24.5             | 24.9                                          | 24.1            |
| Waist circumference in cm                      | 86.2                     | (85.8-86.6)   | 86.4                            | 86.1             | 88.2                                          | 85.8            |

CI= Confidence Interval, BP = blood pressure, FBG =fasting blood glucose, cm= centimeters, kg= Kilogram, mmHg= millimeters of mercury, mg/dl = milligram/deciliter, g/day = gram per day; All estimates and 95% CIs are adjusted for 1387 clusters

1  
2  
3  
4  
5  
6  
7  
8  
9  
10  
11  
12  
13  
14  
15  
16  
17  
18  
19  
20  
21  
22  
23  
24  
25  
26  
27  
28  
29  
30  
31  
32  
33  
34  
35  
36  
37  
38  
39  
40  
41  
42  
43  
44  
45  
46  
47

Figure legends

Figure 1: Study sample selection flow-chart

Figure 2. Clustering of NCD risk factors in the study population

For peer review only

### A. Contributorship statement

Sankara Sarma contributed to the design, data analysis, data interpretation and reviewing the manuscript; Rajeev Sadanandan contributed to the concept, data interpretation and reviewing the manuscript; Jissa Vinoda Thulaseedharan contributed to the design, data analysis, drafting and reviewing the manuscript; Biju Soman contributed to the design, data acquisition, data analysis, data interpretation, drafting and reviewing the manuscript; K Srinivasan contributed to the design, data interpretation and reviewing the manuscript; Ravi Prasad Varma contributed to the design, data analysis, data interpretation and reviewing the manuscript; Manju R Nair contributed to the design, data analysis, data interpretation and reviewing the manuscript; AS Pradeepkumar contributed to the design, data acquisition, data analysis, data interpretation and reviewing the manuscript; Panniyammakal Jeemon contributed to the data analysis and data interpretation, drafting and reviewing the manuscript; KR Thankappan contributed to the concept, data acquisition, data interpretation and reviewing the manuscript; V Raman Kutty contributed to the concept, data interpretation and reviewing the manuscript.

### B. Competing interest

We declare that there were no competing interests.

### C. Data Sharing statement

This is the first paper from the research work. We are still working on the data, and the data will be made available soon. Meanwhile, we shall share the data on request for legitimate use.



1  
2  
3 REFERENCE  
4  
5

- 6 1. India State-Level Disease Burden Initiative Collaborators. Nations within a nation: variations in  
7 epidemiological transition across the states of India, 1990-2016 in the Global Burden of Disease  
8 Study. *Lancet* 2017;390(10111):2437-60. doi: 10.1016/S0140-6736(17)32804-0  
9
- 10 2. ICMR, PHFI, IHME. India: Health of the Nation's States-The India State-Level Disease Burden Initiative.  
11 New Delhi, 2017.  
12
- 13 3. Daivadanam M, Absetz P, Sathish T, *et al.* Lifestyle change in Kerala, India: needs assessment and  
14 planning for a community-based diabetes prevention trial. *BMC Public Health* 2013;13:95.  
15 doi:10.1186/1471-2458-13-95  
16
- 17 4. Census (2011), Primary Census abstracts. Office of the Registrar General & Census Commissioner, India:  
18 Ministry of Home Affairs, Government of India, 2011.  
19
- 20 5. Thankappan KR, Shah B, Mathur P, *et al.* Risk factor profile for chronic non-communicable diseases:  
21 results of a community-based study in Kerala, India. *Indian J Med Res* 2010;131:53-63.  
22
- 23 6. Kish L. A Procedure for Objective Respondent Selection within the Household. *Journal of the American*  
24 *Statistical Association* 1949;44(247):380-87. doi: 10.1080/01621459.1949.10483314  
25
- 26 7. World Health Organization. NCDs | STEPS Manual. WHO. 2017.  
27 <http://www.who.int/ncds/surveillance/steps/manual/en/> (accessed 9 Nov 2018).  
28
- 29 8. WHO. Department of Chronic Diseases and Health Promotion/Surveillance and Population-Based  
30 Prevention/World Health Organization. Global Physical Activity Questionnaire (GPAQ). Geneva  
31 2002.  
32
- 33 9. National High Blood Pressure Education Program. The Seventh Report of the Joint National Committee  
34 on Prevention, Detection, Evaluation, and Treatment of High Blood Pressure. Bethesda (MD)::  
35 National Heart, Lung, and Blood Institute (US) 2004.  
36 <http://www.ncbi.nlm.nih.gov/books/NBK9630/> (accessed 9 Nov 2018).  
37
- 38 10. Kawasaki T, Itoh K, Uezono K, *et al.* A simple method for estimating 24 h urinary sodium and potassium  
39 excretion from second-morning voiding urine specimen in adults. *Clin Exp Pharmacol Physiol*  
40 1993;20(1):7-14.  
41
- 42 11. Johnson C, Mohan S, Praveen D, *et al.* Protocol for developing the evidence base for a national salt  
43 reduction programme for India. *BMJ Open* 2014;4:e006629. doi:10.1136/bmjopen-2014-006629  
44
- 45 12. Johnson C, Mohan S, Rogers K, *et al.* Mean Dietary Salt Intake in Urban and Rural Areas in India: A  
46 Population Survey of 1395 Persons. *J Am Heart Assoc* 2017;6. doi:10.1161/JAHA.116.004547  
47  
48  
49  
50  
51  
52  
53  
54  
55  
56  
57  
58  
59  
60

13. James PA, Oparil S, Carter BL, et al. 2014 evidence-based guideline for the management of high blood pressure in adults: a report from the panel members appointed to the Eighth Joint National Committee (JNC 8). *JAMA* 2014;311(5):507-20. doi: 10.1001/jama.2013.284427
14. WHO. Obesity: preventing and managing the global epidemic. World Health Organization. Geneva. 2000
15. Alberti KG, Zimmet P, Shaw J. Metabolic syndrome--a new world-wide definition. A Consensus Statement from the International Diabetes Federation. *Diabet Med* 2006;23(5):469-80. doi: 10.1111/j.1464-5491.2006.01858.x
16. Sathish T, Kannan S, Sarma SP, et al. Seven-year longitudinal change in risk factors for non-communicable diseases in rural Kerala, India: The WHO STEPS approach. *PLOS ONE* 2017;12:e0178949. doi:10.1371/journal.pone.0178949
17. Oommen AM, Abraham VJ, George K, et al. Prevalence of risk factors for non-communicable diseases in rural & urban Tamil Nadu. *Indian J Med Res* 2016;144:460-71. doi:10.4103/0971-5916.198668
18. Anchala R, Kannuri NK, Pant H, et al. Hypertension in India: a systematic review and meta-analysis of prevalence, awareness, and control of hypertension. *J Hypertens* 2014;32:1170-7. doi:10.1097/HJH.0000000000000146
19. Garg A, Anand T, Sharma U, et al. Prevalence of Risk Factors for Chronic Non-communicable Diseases Using WHO Steps Approach in an Adult Population in Delhi. *J Family Med Prim Care* 2014;3:112-8. doi:10.4103/2249-4863.137617
20. Sajeev P, Soman B. Prevalence of noncommunicable disease risk factors among the Kani tribe in Thiruvananthapuram district, Kerala. *Indian Heart Journal* 2018;70:598-603. doi:10.1016/j.ihj.2018.01.022
21. Mohan V, Deepa M, Anjana RM, et al. Incidence of diabetes and pre-diabetes in a selected urban south Indian population (CUPS-19). *J Assoc Physicians India* 2008;56:152-7.
22. A. R, Abraham SB, Reddy TG, et al. A community study of alcohol consumption in a rural area in South India. *Int J Community Med Public Health* 2017;4:2172. doi:10.18203/2394-6040.ijcmph20172197
23. Teramoto T, Kawamori R, Miyazaki S, et al. Sodium intake in men and potassium intake in women determine the prevalence of metabolic syndrome in Japanese hypertensive patients: OMEGA Study. *Hypertens Res* 2011;34:957-62. doi:10.1038/hr.2011.63
24. He J, Gu D, Chen J, et al. Gender Difference in Blood Pressure Responses to Dietary Sodium Intervention in the GenSalt Study. *J Hypertens* 2009;27:48-54. <https://www.ncbi.nlm.nih.gov/pmc/articles/PMC2882679/> (accessed 15 Jun 2019).

- 1
  - 2
  - 3
  - 4
  - 5
  - 6
  - 7
  - 8
  - 9
  - 10
  - 11
  - 12
  - 13
  - 14
  - 15
  - 16
  - 17
  - 18
  - 19
  - 20
  - 21
  - 22
  - 23
  - 24
  - 25
  - 26
  - 27
  - 28
  - 29
  - 30
  - 31
  - 32
  - 33
  - 34
  - 35
  - 36
  - 37
  - 38
  - 39
  - 40
  - 41
  - 42
  - 43
  - 44
  - 45
  - 46
  - 47
  - 48
  - 49
  - 50
  - 51
  - 52
  - 53
  - 54
  - 55
  - 56
  - 57
  - 58
  - 59
  - 60
25. Rhee M-Y, Kim J-H, Shin S-J, et al. Estimation of 24-Hour Urinary Sodium Excretion Using Spot Urine Samples. *Nutrients* 2014;6:2360–75. doi:10.3390/nu6062360
26. Jeemon P, Prabhakaran D, Goenka S, et al. Impact of comprehensive cardiovascular risk reduction programme on risk factor clustering associated with elevated blood pressure in an Indian industrial population. *Indian J Med Res* 2012;135(4):485-93.
27. Reddy KS, Prabhakaran D, Jeemon P, et al. Educational status and cardiovascular risk profile in Indians. *Proc Natl Acad Sci USA* 2007;104:16263–8. doi:10.1073/pnas.0700933104
28. Kim YJ, Lee JS, Park J, et al. Trends in socioeconomic inequalities in five major risk factors for cardiovascular disease in the Korean population: a cross-sectional study using data from the Korea National Health and Nutrition Examination Survey, 2001–2014. *BMJ Open* 2017;7:e014070. doi:10.1136/bmjopen-2016-014070
29. Tracey ML, Fitzgerald S, Geaney F, et al. Socioeconomic inequalities of cardiovascular risk factors among manufacturing employees in the Republic of Ireland: A cross-sectional study. *Preventive Medicine Reports* 2015;2:699–703. doi:10.1016/j.pmedr.2015.08.003
30. Psaltopoulou T, Hatzis G, Papageorgiou N, et al. Socioeconomic status and risk factors for cardiovascular disease: Impact of dietary mediators. *Hellenic Journal of Cardiology* 2017;58:32–42. doi:10.1016/j.hjc.2017.01.022
31. Jahangiry L, Ghanbari J, Abbasalizad Farhangi M, et al. Predictors of poor blood pressure control among Iranian hypertensive patients. *BMC Res Notes* 2017;10. doi:10.1186/s13104-017-2971-4
32. Gillespie CD, Hurvitz KA, Centers for Disease Control and Prevention (CDC). Prevalence of hypertension and controlled hypertension - the United States, 2007–2010. *MMWR supplements* 2013;62:144–8.
33. Xu D, Chen W, Li X, et al. Factors Associated with Blood Pressure Control in Hypertensive Patients with Coronary Heart Disease: Evidence from the Chinese Cholesterol Education Program. *PLoS One* 2013;8. doi:10.1371/journal.pone.0063135
34. Song Y, Liu X, Zhu X, et al. Increasing trend of diabetes combined with hypertension or hypercholesterolemia: NHANES data analysis 1999–2012. *Sci Rep* 2016;6. doi:10.1038/srep36093
35. Ghannem HB. 103: Challenges of Preventing Non-Communicable Diseases Risk Factors in Urban Context in Tunisia. *BMJ Open* 2015;5:BMJ open-2015-forum2015abstracts.103. doi:10.1136/bmjopen-2015-forum2015abstracts.103
36. Pullar J, Allen L, Townsend N, et al. The impact of poverty reduction and development interventions on non-communicable diseases and their behavioural risk factors in low and lower-middle income countries: A systematic review. *PLOS ONE* 2018;13:e0193378. doi:10.1371/journal.pone.0193378

- 1  
2  
3 37. Hunter DJ, Reddy KS. Noncommunicable diseases. *N Engl J Med* 2013;369(14):1336-43. doi:  
4 10.1056/NEJMra1109345  
5  
6 38. Allen LN, Pullar J, Wickramasinghe KK, et al. Evaluation of research on interventions aligned to WHO  
7 'Best Buys' for NCDs in low-income and lower-middle-income countries: a systematic review from  
8 1990 to 2015. *BMJ Glob Health* 2018;3(1):e000535. doi: 10.1136/bmjgh-2017-000535  
9  
10 39. Daivadanam M, Absetz P, Sathish T, et al. Lifestyle change in Kerala, India: needs assessment and  
11 planning for a community-based diabetes prevention trial. *BMC Public Health* 2013;13:95.  
12 doi:10.1186/1471-2458-13-95  
13  
14 40. Thankappan KR, Daivadanam M, Sarma P, et al. Smoking cessation among diabetes patients: results  
15 of a pilot randomised controlled trial in Kerala, India. *BMC Public Health* 2013;13:47.  
16 doi:10.1186/1471-2458-13-47  
17  
18 41. Mathews E, Thomas E, Absetz P, et al. Cultural adaptation of a peer-led lifestyle intervention program  
19 for diabetes prevention in India: the Kerala diabetes prevention program (K-DPP). *BMC Public*  
20 *Health* 2018;17:974. doi:10.1186/s12889-017-4986-0  
21  
22 42. Thakur J, Jeet G, Tripathy J. m-STEPS: Developing and implementing a smart innovative android tool  
23 for noncommunicable disease risk factor (STEPS) survey in India. *International Journal of*  
24 *Noncommunicable Diseases* 2016;1:91. doi:10.4103/2468-8827.192018  
25  
26 43. Riley L, Guthold R, Cowan M, et al. The World Health Organization STEPwise Approach to  
27 Noncommunicable Disease Risk-Factor Surveillance: Methods, Challenges, and Opportunities. *Am*  
28 *J Public Health* 2016;106:74–8. doi:10.2105/AJPH.2015.302962  
29  
30  
31  
32  
33  
34  
35  
36  
37

## 38 FUNDING

39 Financial support for this survey was met from the grant given by the Government of Kerala to  
40 Sree Chitra Tirunal Institute for Medical Sciences & Technology (G.O.(Rt.) No.  
41 609/2016/H&FWD dated 24/02/2016) for the Prevention and Control of Non-communicable  
42 diseases in Kerala.  
43  
44  
45  
46  
47  
48  
49  
50  
51  
52  
53  
54  
55  
56  
57  
58  
59  
60

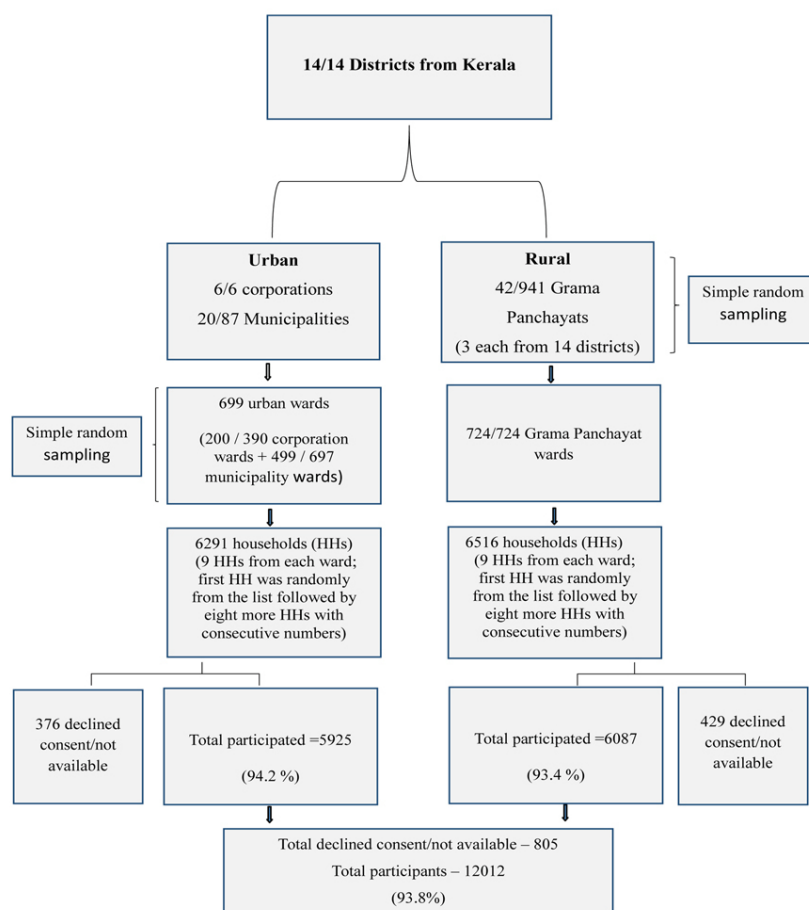

Figure 1: Study sample selection flow-chart

90x90mm (300 x 300 DPI)

Figure 2. Clustering of NCD risk factors in the study population

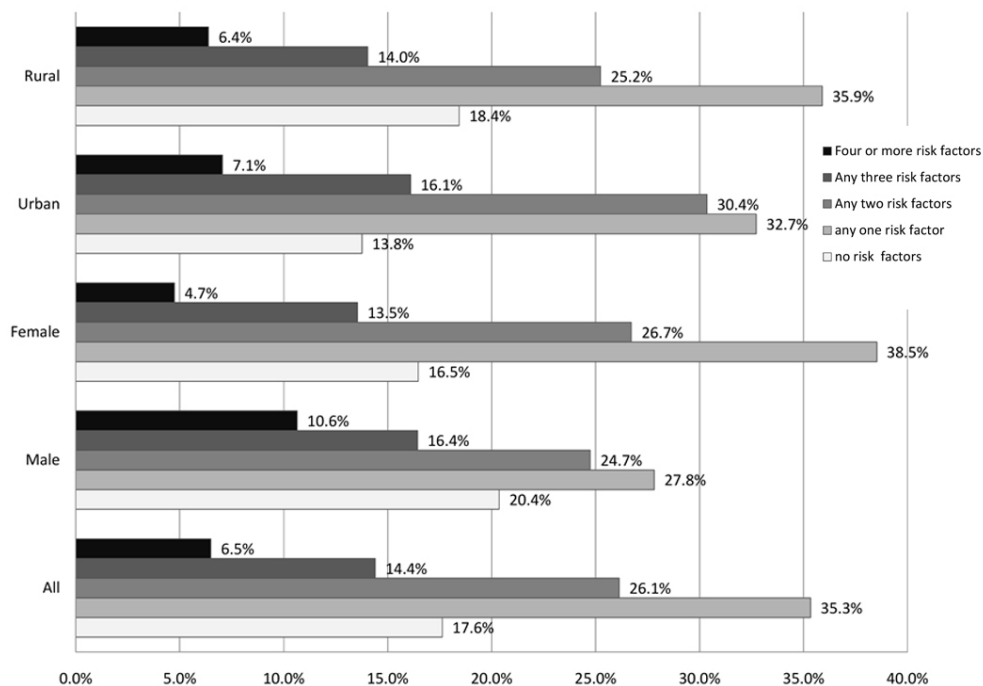

Figure 2: Clustering of NCD risk factors in the study population

90x90mm (300 x 300 DPI)

**STROBE 2007 (v4) Statement—Checklist of items that should be included in reports of *cross-sectional studies***

| Section/Topic                | Item # | Recommendation                                                                                                                                                                       | Reported on page # |
|------------------------------|--------|--------------------------------------------------------------------------------------------------------------------------------------------------------------------------------------|--------------------|
| <b>Title and abstract</b>    | 1      | (a) Indicate the study's design with a commonly used term in the title or the abstract                                                                                               | 1,2                |
|                              |        | (b) Provide in the abstract an informative and balanced summary of what was done and what was found                                                                                  | 2                  |
| <b>Introduction</b>          |        |                                                                                                                                                                                      |                    |
| Background/rationale         | 2      | Explain the scientific background and rationale for the investigation being reported                                                                                                 | 4                  |
| Objectives                   | 3      | State specific objectives, including any prespecified hypotheses                                                                                                                     | 4                  |
| <b>Methods</b>               |        |                                                                                                                                                                                      |                    |
| Study design                 | 4      | Present key elements of study design early in the paper                                                                                                                              | 4                  |
| Setting                      | 5      | Describe the setting, locations, and relevant dates, including periods of recruitment, exposure, follow-up, and data collection                                                      | 5                  |
| Participants                 | 6      | (a) Give the eligibility criteria, and the sources and methods of selection of participants                                                                                          | 5-6                |
| Variables                    | 7      | Clearly define all outcomes, exposures, predictors, potential confounders, and effect modifiers. Give diagnostic criteria, if applicable                                             | 6-8                |
| Data sources/<br>measurement | 8*     | For each variable of interest, give sources of data and details of methods of assessment (measurement). Describe comparability of assessment methods if there is more than one group | 6-8                |
| Bias                         | 9      | Describe any efforts to address potential sources of bias                                                                                                                            | 9                  |
| Study size                   | 10     | Explain how the study size was arrived at                                                                                                                                            | 5                  |
| Quantitative variables       | 11     | Explain how quantitative variables were handled in the analyses. If applicable, describe which groupings were chosen and why                                                         | 9-11               |
| Statistical methods          | 12     | (a) Describe all statistical methods, including those used to control for confounding                                                                                                | 11                 |
|                              |        | (b) Describe any methods used to examine subgroups and interactions                                                                                                                  | 11                 |
|                              |        | (c) Explain how missing data were addressed                                                                                                                                          | 11                 |
|                              |        | (d) If applicable, describe analytical methods taking account of sampling strategy                                                                                                   | 11                 |
|                              |        | (e) Describe any sensitivity analyses                                                                                                                                                | 11                 |
| <b>Results</b>               |        |                                                                                                                                                                                      | 12-14              |

|                          |     |                                                                                                                                                                                                              |              |
|--------------------------|-----|--------------------------------------------------------------------------------------------------------------------------------------------------------------------------------------------------------------|--------------|
| Participants             | 13* | (a) Report numbers of individuals at each stage of study—eg numbers potentially eligible, examined for eligibility, confirmed eligible, included in the study, completing follow-up, and analysed            | 12, Figure 1 |
|                          |     | (b) Give reasons for non-participation at each stage                                                                                                                                                         | NA           |
|                          |     | (c) Consider use of a flow diagram                                                                                                                                                                           | Figure 1     |
| Descriptive data         | 14* | (a) Give characteristics of study participants (eg demographic, clinical, social) and information on exposures and potential confounders                                                                     | 12           |
|                          |     | (b) Indicate number of participants with missing data for each variable of interest                                                                                                                          | 12           |
| Outcome data             | 15* | Report numbers of outcome events or summary measures                                                                                                                                                         | 12-14        |
| Main results             | 16  | (a) Give unadjusted estimates and, if applicable, confounder-adjusted estimates and their precision (eg, 95% confidence interval). Make clear which confounders were adjusted for and why they were included | 12-14        |
|                          |     | (b) Report category boundaries when continuous variables were categorized                                                                                                                                    | 12-14        |
|                          |     | (c) If relevant, consider translating estimates of relative risk into absolute risk for a meaningful time period                                                                                             | NA           |
| Other analyses           | 17  | Report other analyses done—eg analyses of subgroups and interactions, and sensitivity analyses                                                                                                               | NA           |
| <b>Discussion</b>        |     |                                                                                                                                                                                                              |              |
| Key results              | 18  | Summarise key results with reference to study objectives                                                                                                                                                     | 12           |
| Limitations              | 19  | Discuss limitations of the study, taking into account sources of potential bias or imprecision. Discuss both direction and magnitude of any potential bias                                                   | 17           |
| Interpretation           | 20  | Give a cautious overall interpretation of results considering objectives, limitations, multiplicity of analyses, results from similar studies, and other relevant evidence                                   | 15-16        |
| Generalisability         | 21  | Discuss the generalisability (external validity) of the study results                                                                                                                                        | 17,18        |
| <b>Other information</b> |     |                                                                                                                                                                                                              |              |
| Funding                  | 22  | Give the source of funding and the role of the funders for the present study and, if applicable, for the original study on which the present article is based                                                | 27           |

\*Give information separately for cases and controls in case-control studies and, if applicable, for exposed and unexposed groups in cohort and cross-sectional studies.

**Note:** An Explanation and Elaboration article discusses each checklist item and gives methodological background and published examples of transparent reporting. The STROBE checklist is best used in conjunction with this article (freely available on the Web sites of PLoS Medicine at <http://www.plosmedicine.org/>, Annals of Internal Medicine at <http://www.annals.org/>, and Epidemiology at <http://www.epidem.com/>). Information on the STROBE Initiative is available at [www.strobe-statement.org](http://www.strobe-statement.org).



# BMJ Open

## Prevalence of risk factors of non-communicable diseases in Kerala, India; results of a cross-sectional study

|                                 |                                                                                                                                                                                                                                                                                                                                                                                                                                                                                                                                                                                                                                                                                                                                                                                                                                                                                                                                                                                                                                                                                                                                                                                                                                                                                                                                                                                                                                                                                                         |
|---------------------------------|---------------------------------------------------------------------------------------------------------------------------------------------------------------------------------------------------------------------------------------------------------------------------------------------------------------------------------------------------------------------------------------------------------------------------------------------------------------------------------------------------------------------------------------------------------------------------------------------------------------------------------------------------------------------------------------------------------------------------------------------------------------------------------------------------------------------------------------------------------------------------------------------------------------------------------------------------------------------------------------------------------------------------------------------------------------------------------------------------------------------------------------------------------------------------------------------------------------------------------------------------------------------------------------------------------------------------------------------------------------------------------------------------------------------------------------------------------------------------------------------------------|
| Journal:                        | <i>BMJ Open</i>                                                                                                                                                                                                                                                                                                                                                                                                                                                                                                                                                                                                                                                                                                                                                                                                                                                                                                                                                                                                                                                                                                                                                                                                                                                                                                                                                                                                                                                                                         |
| Manuscript ID                   | bmjopen-2018-027880.R2                                                                                                                                                                                                                                                                                                                                                                                                                                                                                                                                                                                                                                                                                                                                                                                                                                                                                                                                                                                                                                                                                                                                                                                                                                                                                                                                                                                                                                                                                  |
| Article Type:                   | Original research                                                                                                                                                                                                                                                                                                                                                                                                                                                                                                                                                                                                                                                                                                                                                                                                                                                                                                                                                                                                                                                                                                                                                                                                                                                                                                                                                                                                                                                                                       |
| Date Submitted by the Author:   | 19-Sep-2019                                                                                                                                                                                                                                                                                                                                                                                                                                                                                                                                                                                                                                                                                                                                                                                                                                                                                                                                                                                                                                                                                                                                                                                                                                                                                                                                                                                                                                                                                             |
| Complete List of Authors:       | <p>Sarma, P; Sree Chitra Tirunal Institute for Medical Sciences and Technology, Achutha Menon Centre for Health Science Studies<br/>Sadanandan, Rajeev; Government of Kerala, Department of Health &amp; Family Welfare<br/>Thulaseedharan, Jissa Vinoda; Sree Chitra Tirunal Institute for Medical Sciences and Technology, Achutha Menon Centre for Health Science Studies<br/>Soman, Biju; Sree Chitra Tirunal Institute for Medical Sciences and Technology, Achutha Menon Centre for Health Science Studies<br/>Srinivasan, Kannan; Sree Chitra Tirunal Institute for Medical Sciences and Technology, Achutha Menon Centre for Health Science Studies<br/>Varma, R; Sree Chitra Tirunal Institute for Medical Sciences and Technology, Achutha Menon Centre for Health Science Studies<br/>Nair, Manju; Sree Chitra Tirunal Institute for Medical Sciences and Technology, Achutha Menon Centre for Health Science Studies<br/>Pradeepkumar, AS; Sree Chitra Tirunal Institute for Medical Sciences and Technology, Achutha Menon Centre for Health Science Studies<br/>Jeemon, Panniyammakal; Sree Chitra Tirunal Institute for Medical Sciences and Technology, Achutha Menon Centre for Health Science Studies<br/>Thankappan, KR; Sree Chitra Tirunal Institute for Medical Sciences and Technology, Achutha Menon Centre for Health Science Studies<br/>Kutty, Raman; Sree Chitra Tirunal Institute for Medical Sciences and Technology, Achutha Menon Centre for Health Science Studies</p> |
| <b>Primary Subject Heading</b>: | Public health                                                                                                                                                                                                                                                                                                                                                                                                                                                                                                                                                                                                                                                                                                                                                                                                                                                                                                                                                                                                                                                                                                                                                                                                                                                                                                                                                                                                                                                                                           |
| Secondary Subject Heading:      | Epidemiology, Cardiovascular medicine, Health policy                                                                                                                                                                                                                                                                                                                                                                                                                                                                                                                                                                                                                                                                                                                                                                                                                                                                                                                                                                                                                                                                                                                                                                                                                                                                                                                                                                                                                                                    |
| Keywords:                       | Prevalence, NCD risk factors, Kerala, Diabetes, Hypertension < CARDIOLOGY                                                                                                                                                                                                                                                                                                                                                                                                                                                                                                                                                                                                                                                                                                                                                                                                                                                                                                                                                                                                                                                                                                                                                                                                                                                                                                                                                                                                                               |
|                                 |                                                                                                                                                                                                                                                                                                                                                                                                                                                                                                                                                                                                                                                                                                                                                                                                                                                                                                                                                                                                                                                                                                                                                                                                                                                                                                                                                                                                                                                                                                         |

SCHOLARONE™  
Manuscripts

1  
2  
3 **Prevalence of risk factors of non-communicable diseases in Kerala, India; results of a**  
4  
5 **cross-sectional study**  
6  
7

8 Authors: P Sankara Sarma<sup>1</sup>, Rajeev Sadanandan<sup>2</sup>, Jissa Vinoda Thulaseedharan<sup>1</sup>, Biju Soman<sup>1\*</sup>,  
9 Kannan Srinivasan<sup>1</sup>, Ravi Prasad Varma<sup>1</sup>, Manju R Nair<sup>1</sup>, AS Pradeepkumar<sup>1</sup>, Panniyammakal  
10 Jeemon<sup>1</sup>, Kavumpurathu Raman Thankappan<sup>1</sup>, V Raman Kutty<sup>1</sup>  
11

12 \*Corresponding author: Biju Soman, Professor, Achutha Menon Centre for Health Science  
13 Studies (AMCHSS), Sree Chitra Tirunal Institute for Medical Sciences & Technology  
14 (SCTIMST), Trivandrum, Kerala, India, PIN695011; [bijusoman@sctimst.ac.in](mailto:bijusoman@sctimst.ac.in), +919447862736  
15  
16

17  
18 Affiliations:

- 19 1. Sree Chitra Tirunal Institute for Medical Sciences and Technology, Trivandrum
- 20 2. Department of Health and Family Welfare, Government of Kerala.
- 21
- 22
- 23
- 24
- 25

26 P Sankara Sarma, AMCHSS, SCTIMST, Trivandrum, India

27 Rajeev Sadanandan, Dept. of Health & Family Welfare, Govt. of Kerala, Thiruvananthapuram,  
28 India

29 Jissa Vinoda Thulaseedharan, AMCHSS, SCTIMST, Trivandrum, India

30 K Srinivasan, AMCHSS, SCTIMST, Trivandrum, India

31 Ravi Prasad Varma, AMCHSS, SCTIMST, Trivandrum, India

32 Manju R Nair, AMCHSS, SCTIMST, Trivandrum, India

33 AS Pradeep Kumar, AMCHSS, SCTIMST, Trivandrum, India

34 Panniyammakal Jeemon, AMCHSS, SCTIMST, Trivandrum, India

35 Kavumpurathu Raman Thankappan, AMCHSS, SCTIMST, Trivandrum, India

36 V Raman Kutty, AMCHSS, SCTIMST, Trivandrum, India  
37  
38  
39  
40

41 The Department of Health and Family Welfare, Government of Kerala, as per its order  
42 no.GO(Rt)No.609/2016/H&FWD Dated 24/02/2016 supported this work. The authors thank the  
43 project team, comprising of two senior consultants, 28 district-level managers, 68 nurses and two  
44 office staff for their untiring efforts. We also thank the Department of Health Services in Kerala,  
45 the DDRC SRL Diagnostics Pvt. Ltd. and the people of Kerala, particularly the study  
46 participants for their wholehearted support for this state-wide survey.  
47  
48

49 Number of words: 3951  
50  
51  
52  
53  
54  
55  
56  
57  
58  
59  
60

## Abstract

**Objectives:** To estimate the prevalence of non-communicable disease (NCD) risk factors in Kerala.

**Design:** A community based cross-sectional survey.

**Participants:** In 2016-17 a multi-stage cluster sample of 12,012 (18-69 years) participants from all 14 districts in Kerala were studied.

**Main outcome measures:** NCD risk factors as stipulated in the World Health Organization's approach to NCD risk factors Surveillance were studied. Parameters studied included physical activity score, anthropometry, blood pressure, and fasting blood glucose and morning urine sample to estimate dietary intake of salt.

**Results:** Mean age was 42.5 years (SD=14.8). Abdominal obesity was more in women (72.6%; 95%CI 70.7-74.5) compared to men (39.1%; CI 36.6-41.7), and more in urban (67.4%; CI 65.0-69.7) compared to rural residents (58.6%; CI 56.6-60.5). Current use of tobacco and alcohol in men were 20.3% (CI 18.6-22.1) and 28.9% (CI 26.5-31.4), respectively. The estimated mean salt intake (6.7 g/day) was lower than other reported figures in India. The overall prevalence of raised blood pressure (BP) was 30.4% (CI 29.1-31.7) and raised fasting blood glucose (FBG) was 19.2% (95% CI 18.1 - 20.3). Raised BP was more in men (34.6%, CI 32.6-36.7) compared to women (28%; CI 26.4-29.4) but not different among urban (33.1%; CI 31.3-34.9) and rural (29.8%; CI 28.3-31.3) residents. Only 12.4% of hypertensives and 15.3% of diabetics were found to have these conditions under control. Only 13.8% of urban and 18.4% of rural residents did not have any of the seven NCD risk factors studied.

**Conclusion:** Majority of the participants had more than one NCD risk factor. There was no rural-urban difference in raised BP or raised FBG prevalence in Kerala. The higher rates of NCD risk factors and lower rates of hypertension and diabetes control call for concerted primary and secondary prevention strategies to address the future burden of NCDs.

**Keywords:** Prevalence, NCD risk factors, Kerala, diabetes, hypertension

### Strengths and limitations

- The study gives robust rates of NCD risk factors in Kerala that can be compared with other studies in India and abroad, as we had used the widely validated WHO STEPS questionnaire, standard equipment and methods to study a representative sample of adults.
- We took the third reading for blood pressure (BP) only when the difference in systolic BP of the previous two readings was  $>10$  mmHg, and that of diastolic BP was  $>6$  mmHg which is a deviation from the WHO STEPS guidelines that insist on taking three readings for everyone.
- The biochemical measurements for serum cholesterol and measurements of hip circumference were not done in this study due to logistic limitations, but they were not the core features of WHO STEPS 1 & 2.
- To our knowledge, no other study on NCD risk factors in Kerala in the recent past, including those by the same group of researchers, was done on a state-wide cross-sectional sample.

## INTRODUCTION

Over two-thirds (67%) of disease burden in India, measured by disability-adjusted life years (DALYs), is attributable to Non-communicable diseases (NCDs) and injuries.<sup>1</sup> The India state-level disease burden estimates suggest significant differences among states in the composition of disease burden.<sup>1</sup> Compared to other states in India, the state of Kerala is relatively in an advanced stage of epidemiological transition<sup>2</sup>. For example over 90% of premature mortality in Kerala (mortality in the age group of 15-69 years) could be attributed to NCDs.<sup>2</sup> Nearly a quarter of the total disease burden in DALYs is due to four major NCDs (ischemic heart disease, stroke, chronic obstructive pulmonary diseases, and diabetes).<sup>1</sup> The increasing proportion of elders (12.6%<sup>3</sup>) and the adoption of sedentary lifestyles in Kerala might have contributed to the increase in non-communicable diseases.<sup>3</sup> Considering the gravity of the challenge, the state government has taken up community-based interventions to reduce NCD risk factors. (GO(Rt)No.609/2016/H&FWD Dated 24/02/2016 by Govt. of Kerala).

While the estimates of disease burden based on modelling of routine health data are useful in planning resource allocation, strategic investments in prevention and management of NCDs require accurate assessment of their prevalence and risk factors. Hence, we conducted a state-wide cross-sectional survey to estimate the current prevalence of NCD risk factors in Kerala.

## METHODS

### Study settings

1  
2  
3 The state of Kerala, in South India, has a population of 33.4 million<sup>4</sup> and an area of 38,863  
4 square kilometres. Nearly half the population is urban. A cross-sectional survey was conducted  
5  
6 in all the 14 districts of Kerala, in both rural and urban areas from October 2016 to March 2017.  
7  
8  
9

## 10 **Sampling**

11  
12 To provide separate prevalence estimates for different strata (for example; among male/female  
13 and urban/rural residence), of various NCD risk factors with an expected prevalence of 5%  
14 (based on the physical inactivity rate of men in rural area as 4.7%<sup>5</sup> in our previous study), and  
15 relative precision of 20% a sample size of 12000 adults was arrived at. We also considered a  
16 design effect of 1.5 and a response rate of 90% in the sample size estimation.  
17  
18  
19  
20  
21  
22

23  
24 A multi-stage cluster sampling strategy was adopted to identify a representative sample of  
25 eligible participants for the cross-sectional survey (Fig 1). The primary sampling strata were a  
26 defined geographical area administered by one of the local government institutions, i.e.,  
27 municipal corporations and municipalities in urban areas and Grama Panchayats (GPs) in rural  
28 areas, which are the lowest tier of administrative units. The population of GPs in Kerala ranges  
29 from 20000 to 40000. Data were collected from two urban and three rural sites in 12 out of the  
30  
31 14 districts; the single urban site (these have only one urban site each) and three rural sites were  
32 selected from the other two districts. We surveyed all the municipal corporations (n=6) and a  
33 random sample of 20 of 87 municipalities in the urban region. We randomly selected three GPs  
34 from each district (the number of GPs per district ranges from 23 to 94, and the total number of  
35 GPs is 941).  
36  
37  
38  
39  
40  
41  
42  
43  
44  
45  
46  
47  
48

49 Each of the primary sampling strata is further divided into wards. We selected 200 out of 390  
50 wards in the municipal corporations, and 499 out of 697 wards of the selected municipalities for  
51 the survey. All the 724 wards of selected GPs were also selected. (Fig 1) In the final stage of  
52  
53  
54  
55  
56  
57  
58  
59  
60

1  
2  
3 sampling, we identified a cluster of nine households from each ward. For the selection of a  
4 cluster of households, one household was identified randomly from the available list of all the  
5 households in the selected ward, followed by the selection of eight more households with  
6 consecutive house numbers.  
7  
8  
9  
10

### 11 **Study participants**

12 All the individuals between the age group of 18-69 years were eligible to be part of the survey. If  
13 there were more than one adult in this age group, KISH method<sup>6</sup> was used to identify one of  
14 them from the household. We excluded pregnant women from physical and biochemical  
15 measurements.  
16  
17  
18  
19  
20  
21  
22

### 23 **Ethical considerations**

24 All participants of the study have given written informed consent. The Institutional Ethics  
25 Committee of SCTIMST, Trivandrum formally approved the conduct of the study  
26 (SCT/IEC/902/MAY-2016 dated 11/05/2016).  
27  
28  
29  
30  
31  
32  
33  
34

### 35 **Patient and public involvement**

36 No patients or public were directly involved in the study. We plan to disseminate the study  
37 results to the policymakers and the public.  
38  
39  
40  
41  
42  
43  
44  
45  
46

### 47 **Study measurements**

#### 48 *Interview Schedule*

49 We used a structured interview schedule based on the WHO STEPS strategy to NCD risk factors  
50 Surveillance (STEPS)<sup>7</sup>, and Thankappan *et al.*<sup>5</sup> had already validated the tool in Malayalam.  
51  
52  
53  
54  
55  
56  
57  
58  
59  
60

1  
2  
3 Awareness of diabetes and hypertension status was assessed by asking questions about past  
4 diagnosis and history of those conditions. Global physical activity questionnaire (GPAQ) was  
5 used to assess physical activity levels.<sup>8</sup>  
6  
7

### 8 9 10 *Anthropometric measurements*

11  
12 Physical and clinical measurements included height, weight, waist circumference, blood  
13 pressure, and heart rate. Trained nurses took all the measurements at the homes of the  
14 participants, ensuring convenience and privacy of the participants. Height was measured using a  
15 SECA 213 stand-alone stadiometer in centimetres. Weight was measured using a portable SECA  
16 803 battery-operated electronic weighing scale in kilograms. Participants were asked to remove  
17 footwear and avoid holding any heavy objects in their bodies, such as mobile phones, wallets,  
18 and heavy belts while taking the measurements.  
19

20  
21 SECA 201 ergonomic retractable tape was used to measure waist circumference, using the  
22 following protocol; firstly the nurses identified and marked the lower palpable margin of the ribs  
23 and the upper margin of the iliac crest, and then they marked the midpoints between these  
24 margins along the mid-axillary line on both sides. The measurement tape was then wrapped  
25 horizontally all around by connecting the marked points on both sides of the participant's body.  
26  
27 Similarly, the nurses documented the height to the nearest 0.5 cm, weight to the nearest 10 gm  
28 and waist circumference to the nearest 0.1 cm at the end of the normal expiration.  
29  
30

### 31 32 33 *Measurement of blood pressure and pulse rate*

34  
35 The blood pressure (BP) and pulse rate were measured using standard battery-operated automatic  
36 BP monitors (OMRON HEM-7120). Before measurement, the participants were seated  
37 comfortably in a relaxed upright position for at least five minutes. Appropriate size cuff was  
38 used to take two readings of blood pressure and pulse rate three minutes apart.<sup>9</sup> The machine  
39  
40  
41  
42  
43  
44



1  
2  
3 was switched off between the readings, after recording the systolic BP and diastolic BP in mm  
4 Hg and heart rate in beats/minute. If systolic BP readings varied more than ten mmHg or  
5  
6 diastolic BP readings varied more than six mmHg, between the two initial measurements, then a  
7  
8 third reading was taken. We estimated the final BP by taking the mean of the last two readings.  
9  
10

### 11 *Biochemical measurements*

12  
13  
14 Nurses gave sample bottles to the participants on the survey day, and they were instructed to  
15  
16 collect 20 ml of the second voiding urine sample (after first voiding in the morning and before  
17  
18 breakfast) on the day of the blood sample collection for glucose estimation. Urinary sodium was  
19  
20 assessed using indirect ion-selective electrode method in an accredited central laboratory.  
21  
22 Modified Kawasaki formulae were used to estimate the 24-hour urinary intake of sodium,<sup>10</sup> and  
23  
24 it was multiplied by 2.54 to estimate daily salt (sodium chloride) intake as advocated by Johnson  
25  
26 et al.<sup>11,12</sup> Capillary blood glucose estimation was done using point of care glucometers (One-  
27  
28 touch ultra-easy, Johnson & Johnson) in the fasting stage. We ensured a minimum of eight hours  
29  
30 of fasting of the participants before taking samples and recorded the glucose measurements in  
31  
32 mg/dl.  
33  
34  
35  
36  
37  
38  
39

### 40 **Administration of questionnaire and recording of study measurements**

41  
42 Open Data Kit (ODK) software was used to develop custom-made data entry forms, with display  
43  
44 both in English and Malayalam (local language), and we used handheld computer tablets for data  
45  
46 collection. ODK is a freely available Open Source Software, and we have integrated a utility to  
47  
48 run KISH method<sup>6</sup> for selection of participants in the data entry form for the STEPS survey in it.  
49  
50 Thirty-four pairs of trained nurses did the field level data collection. They carried the computer  
51  
52 tablets, glucometer, weighing machine, stadiometer, measuring tape, and the blood pressure  
53  
54  
55  
56  
57  
58  
59  
60

1  
2  
3 monitors to the house of the interviewee. After obtaining signed informed consent from the  
4 participants on printed forms, the survey team (nurses) used computer tablets with internet  
5 facility to gather information and record measurements. They also did random blood glucose  
6 estimation of the study participants and gave sample bottles for urine collection with instruction  
7 on how to collect the morning samples, which were collected back in the next morning. The data  
8 get sent automatically to the institute server via the internet. The process was monitored daily by  
9 the district managers and subsequently by the state project management unit, once a week. We  
10 used the *ODK Briefcase* utility to download the aggregated data.  
11  
12  
13  
14  
15  
16  
17  
18  
19  
20  
21

### 22 **Quality control**

23  
24 Two senior public health professionals, with vast experience in the conduct of state-level  
25 programs, were entrusted with the field level supervision and monitoring. They were helped by  
26 28 (two per district) middle-level district programme managers. Residential training sessions  
27 with hands-on training on data collection (using computer tablets) and standard procedures for  
28 the physical and biochemical measurements were conducted for the 34 pairs of nurses at four  
29 places (Thiruvananthapuram, Ernakulam, Thrissur, and Kannur) by the same team of  
30 investigators to ensure quality and uniform standards. Data collected were checked by the  
31 district programme managers for completeness, consistency, and they gave daily feedback to the  
32 data collectors. The district programme managers made regular concurrent and consecutive  
33 visits to selected households to ensure quality. The ODK utility helped in quality check as we  
34 recorded the geo-location and time of the data collection in each household. In addition to the  
35 district level monitoring, we monitored the data collection centrally and sent monthly updates to  
36 district programme managers and field staff on any incomplete records, missing data or any  
37 inconsistencies.  
38  
39  
40  
41  
42  
43  
44  
45  
46  
47  
48  
49  
50  
51  
52  
53  
54  
55  
56  
57  
58  
59  
60

## Definitions

### *Raised BP, raised FBG and daily salt intake*

We defined raised blood pressure (BP) as systolic BP  $\geq 140$  mmHg or diastolic BP  $\geq 90$  mmHg or the person currently using antihypertensive medication (self-reported treatment).<sup>13</sup> Similarly, we defined raised fasting blood glucose (FBG) as FBG of  $\geq 126$  mg/dl or self-reported treatment for diabetes, pre-diabetes as FBG in the range of 100-125 mg/dl and dysglycemia as those with raised FBG values or pre-diabetes.

### *Current smoking and alcohol use*

We defined current tobacco use as the use of any form of tobacco within the past 30 days<sup>7</sup>, and current alcohol use as the intake of at least one standard drink of alcohol in the past 30 days.<sup>7</sup>

### *Fruits and Vegetable intake*

The mean servings of Fruits and Vegetables per day as advocated by WHO.<sup>7</sup>

### *Daily salt intake*

We used the Kawasaki Formula to estimate urinary excretion of sodium from the morning urine sample and multiplied the estimate by 2.54 to get daily salt (sodium chloride) intake.

### *Physical inactivity*

We used the Global Physical Activity Questionnaire (GPAQ) to estimate the total time spent in physical activity and the intensity of the physical activity during a typical week to calculate the physical inactivity. We defined physical inactivity as a combined score of  $< 600$  metabolic equivalents (MET) minutes of moderate and vigorous-intensity physical activity in a typical week.<sup>8</sup>

### *Obesity and overweight*

1  
2  
3 We defined obesity<sup>14</sup> if the body mass index was  $\geq 30$  kg/m<sup>2</sup>, overweight<sup>14</sup> if the body mass index  
4 was in the range of 25-29.99 kg/m<sup>2</sup>, and abdominal obesity<sup>15</sup> if the waist circumference was  
5  
6  $\geq 90$  cm and  $\geq 80$  cm in men and women respectively.  
7  
8

### 9 10 *Clustering of NCD risk factors in participants*

11  
12 Out of the prominent NCD risk factors identified from the previous studies<sup>5</sup>, we studied only  
13 seven (tobacco use, alcohol use, obesity, abdominal obesity, raised BP, raised blood glucose, and  
14 physical inactivity) in this survey, due to logistic limitations. We analysed the pattern of multi-  
15 morbidity by estimating the proportions of individuals with no risk factors, anyone risk factor,  
16 two risk factors, three risk factors and more than three risk factors.  
17  
18  
19  
20  
21  
22

### 23 **Statistical analyses**

24  
25 We derived sampling weights based on the probabilities of selection at various stages of sample  
26 selection and used the inverse of the product of probabilities of sample selection at different  
27 stages in sample weighting. Then we normalised the sampling weights to the total sample size.  
28  
29  
30

31 We used weighted means with 95% confidence intervals (95%CI) to summarise quantitative  
32 variables and percentages with 95%CI to summarise categorical variables and applied variance  
33 inflation for cluster correction while estimating 95%CI. We used IBM SPSS Statistics software  
34 for Windows version 21 (Armonk, NY, USA: IBM Corp.) and STATA Statistical Software:  
35 Release 14. (College Station, TX: Stata Corp LP.) for analysis.  
36  
37  
38  
39  
40  
41  
42  
43  
44  
45

## 46 **RESULTS**

### 47 **Socio-demographic characteristics**

48  
49 In total, 12,012 adults in the age group of 18-69 years participated in the survey with a response  
50 rate of 93.8%. Nearly half (49.3%) of the participants were urban residents, and 63% were  
51  
52  
53  
54  
55  
56  
57  
58  
59  
60

women (Table 1). Mean age was 42.5 years (SD=14.8). The majority (75.7%) have studied up to primary school level or above, and only a third (36.9%) were designated as economically weak, belonging to the Below Poverty Line (BPL) category. Nearly three fourth (73.5%) were married. One of 20 participants (4.8%) was unemployed.

### **Behavioural risk factors**

The rates of use of tobacco and alcohol were low in women. However, the current use of tobacco and alcohol among men were 20.3% (95%CI 18.6-22.1) and 28.9% (95%CI 26.5-31.4) respectively (Table 2). Physical inactivity was reported in 23.7% (95%CI 21.8-25.7) and 20.8% (95%CI 19.0-22.8) of men and women, respectively. The average consumption of fruits was only one serving per day among men, women, urban and rural residents, and the intake of vegetables was two servings per day across these subgroups (Table 3). There were no significant differences in the rates of alcohol consumption, tobacco use, physical inactivity, and consumption of fruits and vegetables between urban and rural residents (Table 2 & 3). The mean salt intake among the participants was 6.7 gm/day (95%CI 6.6-6.8). Table 3 shows that there was no rural-urban difference, but women had significantly higher salt intake (7.5 gm/day) compared to men (5.3gm/day).

### **Prevalence of raised BP and raised FBG**

The weighted means systolic BP were 129.4 mmHg (95%CI 128.6-130.1) among men and 125.0 mmHg (95%CI 124.3-125.6) among women (Table 3). Similarly, the average diastolic BP was 82.6 mmHg (95%CI 82.1-83.1) in men and 79.7 mmHg (95%CI 79.3-80.0) in women. Prevalence of raised BP was 34.6% (95% CI 32.6-36.7) in men and 27.9% (95% CI 26.4 to 29.4) in women (Table 2). There was no rural-urban difference in systolic or diastolic BP. Mean FBG

1  
2  
3 was 108.6 mg/dl, and there were no men-women or rural-urban difference for this parameter  
4 (Table 3). One in five, 19.8% (95%CI 18.2-21.6) of men and 18.8% (95%CI 17.4-20.2) of  
5 women, had raised FBG values, and there was no rural-urban difference (Table 2). Additionally,  
6 36% of men and 35% of women were in the pre-diabetes stage. No rural-urban differences were  
7 present in the rates of raised BP, raised FBG, and two in five adults (40%; 95%CI 38.6-41.3%)  
8 had either raised BP or raised FBG.  
9

10  
11 Among those with a history of hypertension, only 12.3% (95%CI 10.9-14.0) had their BP values  
12 under control (systolic BP<140 mmHg and diastolic BP <90 mmHg). The control rate in men  
13 (7.9%; 95%CI 6.4-9.7) was less than the control rate in women (15.6%; 95%CI 13.5-18.0);  
14 similarly, the control rates among rural residents (11.5%; 95%CI 9.8-13.5) were less than the  
15 urban counterparts (15.9%; 95%CI 13.6-18.4).  
16

17  
18 Among those hypertensives who claimed to be under treatment, 34.1% had their BP under  
19 control (28.6% in men, 36.8% in women, 37.4% in urban residents and 33.2% in rural residents);  
20 the men-women or rural-urban differences were not statistically significant.  
21  
22

23  
24 Among those with a history of diabetes, 15.3% (95%CI 13.1-17.8) had their Blood Sugar under  
25 control (fasting plasma glucose <126 mg/dl) and among those who claimed to be under  
26 treatment, 31.1% (95%CI 27.1-35.4) had their Blood Sugar under control. There was no  
27 significant men-women difference, but the urban residents were found to have better control  
28 (17.0%; 95%CI 13.9-20.6) compared to rural residents (14.9%; 95%CI 12.3-17.9).  
29  
30  
31  
32  
33  
34

### 35 **Body mass index, waist circumference, and obesity**

36  
37 The mean BMI was 24.2 kg/m<sup>2</sup> (95%CI 24.1-24.4) with statistically significant higher BMI for  
38 women and urban residents, though the magnitude of the difference was negligible (Table 3).  
39  
40  
41  
42  
43  
44  
45  
46  
47  
48

1  
2  
3 The weighted mean waist circumference (Table 3) was significantly higher for urban residents  
4 (88.2 cm; 95%CI 87.6-88.8) compared to rural residents (85.8 cm; 95%CI 85.3-86.3).  
5  
6 Overweight was higher among urban residents (33.5%) and women (31.6%) compared to rural  
7  
8 residents (29.7%), and men (28.2%) respectively (Table 2). Similarly, abdominal obesity was  
9  
10 higher for women (72.6%) and urban residents (67.4%) compared to men (39.1%) and rural  
11  
12 residents (58.6%) respectively (Table 2).  
13  
14  
15

### 16 **Clustering of NCD risk factors**

17  
18  
19 Only 20.4% (95%CI 18.5-22.3) of men and 16.5% (95%CI 14.9-18.1) of women were free of  
20  
21 any of the seven NCD risk factors studied, tobacco use, alcohol use, obesity, abdominal obesity,  
22  
23 raised BP, raised blood glucose, or physical inactivity (Figure 2). Proportion with an isolated  
24  
25 risk factor (35.3%) was less frequent than those with multiple risk factors (47.1%), and this trend  
26  
27 was same for all categories like men (27.8% vs 41.8%), women(38.5% vs 45%), rural residents  
28  
29 (35.9% vs 45.7%) and urban residents (32.7% vs 53.5%). Three or more risk factors were  
30  
31 present in 20.9%, and four or more NCD risk factors were present in 6.4% of the participants.  
32  
33  
34  
35  
36  
37

## 38 **DISCUSSION**

39  
40 This study found that most adults (82.4%) of 18-64 years age group in our sample had at  
41  
42 least one of the NCD risk factors, and multiple risk factors were present in 47.1%. Raised BP  
43  
44 and raised FBG were present in 30.4% and 19.2% of adults in Kerala. Overweight prevalence  
45  
46 was as high as 30.4%, and 60.2% had abdominal obesity, which was significantly higher for the  
47  
48 woman. Moreover, dysglycemia (raised FBG and pre-diabetes together) was found to be present  
49  
50 among 54.5% of the adult population.  
51  
52  
53  
54  
55  
56  
57  
58  
59  
60

1  
2  
3 The prevalence of hypertension was found to be comparable with the rates for  
4 Thiruvananthapuram in 2010 by Thankappan *et al.* (28.8%)<sup>5</sup> but less than the rate by Sathish *et*  
5 *al.* (43.2%).<sup>16</sup> The hypertension prevalence of adults in Kerala of 18-64 years was similar to the  
6 rates of urban residents of higher age group (30-64 years) in Tamil Nadu (28.5%).<sup>17</sup>  
7 Hypertension prevalence in Kerala was similar to the estimates of the meta-analysis by Anchala  
8 *et al.* for the urban south India (31.8%).<sup>18</sup>  
9

10  
11  
12 Prevalence of raised FBG in Kerala was higher than the diabetes prevalence in urban  
13 Delhi (18.1%).<sup>19</sup> Prevalence of dysglycemia in more than half (54.5%) of the adult population  
14 poses a challenge to the existing health care system, to maintain the diseases at the current level  
15 and to manage their complications. The increasing behavioural risk factors<sup>16</sup> even among the  
16 tribal communities,<sup>20</sup> and higher conversion rate of pre-diabetes to diabetes among Indians<sup>21</sup>  
17 could be the reason for this much increase in raised FBG.  
18  
19

20  
21  
22 There could be underreporting of some of the behavioural risk factors, especially alcohol  
23 intake as much public debate is going on in the state since 2015 on curtailing the availability of  
24 liquor in the state.<sup>22</sup> The weighted mean salt intake in this study (6.7 g/day) was lower compared  
25 to the estimate for Delhi, Haryana, and Andhra Pradesh, reported by Johnson *et al.*<sup>23</sup> in 2017.  
26 The low levels could be partially due to methodological differences, as we have not inflated the  
27 values for non-urinary losses of salt as done by Johnson *et al.*<sup>11</sup> Further the mean salt intake was  
28 found to be more in women in Kerala (Table 3) compared to studies elsewhere.<sup>11,23,24</sup> There are  
29 methodological controversies regarding use of spot urine for the estimation of 24 hour sodium  
30 excretion<sup>25</sup> (using Kawasaki formulae) and the apparently low intake of salt in Kerala (compared  
31 to other states) needs further research as this hard evidence for salt intake could be the first  
32  
33  
34  
35  
36  
37  
38  
39  
40  
41  
42  
43  
44  
45  
46  
47  
48  
49  
50  
51  
52  
53  
54  
55  
56  
57  
58  
59  
60



1  
2  
3 indication of reversal of NCD risk factors in Kerala. However, more evidence is needed to  
4  
5 substantiate such explanations.  
6

7  
8 Raised BP or raised FBG, present in over 40% of the adult population are significant  
9  
10 contributors to cardiovascular disease mortality. Clustering of multiple risk factors, a finding  
11  
12 reported by other studies from India<sup>26</sup> increases the risk of developing a significant NCD  
13  
14 condition or event shortly. NCD risk factors are identified to be associated with the social  
15  
16 disparity in India<sup>27</sup> and other Asian countries<sup>28</sup> as in the western population.<sup>29,30</sup> The proportion  
17  
18 of known hypertensives with normal BP found in this study (12.3%) was low compared to the  
19  
20 rates from Iran (49.1%),<sup>31</sup> the United States of America (48%)<sup>32</sup> and China (18%).<sup>33</sup> Similarly,  
21  
22 the proportion diabetic with FBG values within normal limits was also low in this study (15.3%)  
23  
24 compared with the improved rates of control found in the western countries; they could achieve  
25  
26 20% control among people with hypertension and diabetes.<sup>34</sup>  
27  
28  
29

30  
31 Mounting evidence on the reduction in NCD risk factors with concerted public health  
32  
33 action in other countries<sup>35,36</sup> gives a positive impetus to the current strategy for NCD risk  
34  
35 reduction efforts in Kerala. Hence, the policy action to address the future NCD burden should  
36  
37 focus not only on single risk factors but also on several of them simultaneously at the population  
38  
39 level. The cumulative effect of acting on multiple risk factors may reduce the total risk  
40  
41 substantially and thus avert several future NCD events.  
42  
43

44  
45 In addition to primary care, provision of drugs and lifestyle counselling for high-risk  
46  
47 individuals is necessary to address the rising burden of cardiovascular events.<sup>37</sup> However, we do  
48  
49 not have enough evidence on the feasibility of such an approach in middle-income countries.<sup>38</sup>  
50  
51 Moreover, in Kerala, despite the high literacy rate and the success stories of implementation  
52  
53 research in cardiovascular risk factors,<sup>39-41</sup> we have the situation of higher prevalence and poor  
54  
55  
56  
57  
58  
59  
60

1  
2  
3 control of hypertension and diabetes. Further in-depth research using qualitative methods might  
4  
5 help us to understand these dilemmas.  
6

7  
8         Strengthening the primary care in Kerala, with a focus on addressing NCD risk factors  
9  
10 and providing universal access to anti-hypertensive and anti-diabetic medicines to all eligible  
11  
12 patients should be a high priority for the Government of Kerala to limit the future burden of  
13  
14 NCDs. The study is timely as the results could be used for Universal Health Coverage initiative  
15  
16 in Kerala, wherein the government is upgrading many peripheral hospitals to Family Health  
17  
18 Centres, with additional inputs in staff and facilities. The high prevalence of NCD risk factors in  
19  
20 Kerala calls for urgent policy action for primary and secondary prevention.  
21  
22  
23  
24  
25

### 26 **Strengths and limitations of the study**

27  
28         We did a sizeable state-wide study on NCD risk factors in Kerala, using trained nurses,  
29  
30 standard equipment, validated research tools and modern utilities like handheld computer tablets.  
31  
32 The use of the WHO STEPS framework for the questionnaire enables the comparison of studies  
33  
34 done within India and abroad.<sup>7</sup> Use of mobile data entry platforms, as we did in this study, are  
35  
36 proven to improve the quality and timeliness of STEPS surveys.<sup>7,42</sup> We had taken the third  
37  
38 reading of BP only when the difference in systolic BP of the earlier two readings<sup>9</sup> was >10  
39  
40 mmHg and that of diastolic BP >6 mmHg (we did third reading in only 18.2% of participants),  
41  
42 which is a deviation to the WHO STEPS guidelines<sup>7</sup> that insists on taking three readings for  
43  
44 everyone. We state this as a limitation of the study. We could not do serum cholesterol and hip  
45  
46 circumference measurements due to logistic limitations, but they are not the core features of the  
47  
48 first two phases of STEPS guidelines.<sup>43</sup> To our knowledge, no other published study on NCD  
49  
50  
51  
52  
53  
54  
55  
56  
57  
58  
59  
60

1  
2  
3 risk factors in Kerala in the recent past, including those by the same group of researchers, were  
4  
5 done on a state-wide scale.  
6  
7  
8  
9

## 10 **CONCLUSION**

11  
12 About 40% of the adult population in Kerala had either raised BP or raised FBG, and the overall  
13  
14 control rates for these conditions were as low as 12.3% and 15.3% respectively. Majority of the  
15  
16 adult population (83.4%) had at least one NCD risk factor, and clustering of risk factors was very  
17  
18 common. The high prevalence of NCDs and their risk factors in Kerala calls for urgent policy  
19  
20 action for prevention at all levels.  
21  
22  
23  
24  
25  
26  
27  
28  
29  
30  
31  
32  
33  
34  
35  
36  
37  
38  
39  
40  
41  
42  
43  
44  
45  
46  
47  
48  
49  
50  
51  
52  
53  
54  
55  
56  
57  
58  
59  
60

Table 1. General characteristics of the study population

| Variables                  | Male<br>(N=4472) | Female<br>(N=7537) | Total<br>(N=12,012)* |
|----------------------------|------------------|--------------------|----------------------|
| Age in years, mean (SD)    | 42.42(15.38)     | 42.58(14.45)       | 42.52 (14.8)         |
| Age groups, n (%)          |                  |                    |                      |
| 18-44                      | 2263(50.60)      | 4114(54.58)        | 6380(53.11)          |
| 45-69                      | 2209(49.40)      | 3423(45.42)        | 5632(46.89)          |
| Residence                  |                  |                    |                      |
| Rural                      | 2305(51.54)      | 3782(50.18)        | 6087(50.67)          |
| Urban                      | 2167(48.46)      | 3755(49.82)        | 5925(49.33)          |
| Education                  |                  |                    |                      |
| Up to primary school       | 1002(22.41)      | 1914(25.39)        | 2916(24.28)          |
| Secondary to High school   | 2281(51.01)      | 3645(48.36)        | 5928(49.35)          |
| >high school               | 1189(26.59)      | 1978(26.24)        | 3168(26.37)          |
| Social groups              |                  |                    |                      |
| Below poverty line         | 1633(36.52)      | 2796(37.10)        | 4431(36.89)          |
| Above poverty line         | 2730(61.05)      | 4555(60.44)        | 7286(60.66)          |
| Others                     | 109(2.44)        | 186(2.47)          | 295(2.46)            |
| Marital status             |                  |                    |                      |
| Never married              | 1140(25.49)      | 954(12.66)         | 2095(17.44)          |
| Married                    | 3242(72.50)      | 5579(74.02)        | 8823(73.45)          |
| Others                     | 90(2.01)         | 1004(13.32)        | 1094(9.11)           |
| Occupation                 |                  |                    |                      |
| Officers and professionals | 688(15.38)       | 536(7.11)          | 1224(10.19)          |
| Self-employed              | 1286(28.76)      | 262(3.48)          | 1549(12.90)          |
| Skilled labourer           | 703(15.72)       | 86(1.14)           | 789(6.57)            |
| Unskilled labourer         | 490(10.96)       | 232(3.08)          | 723(6.02)            |
| Unemployed                 | 413(9.24)        | 161(2.14)          | 574(4.78)            |
| Students                   | 617(13.80)       | 773(10.26)         | 1390(11.57)          |
| Others                     | 275(6.15)        | 275(3.64)          | 550(4.57)            |

\*3 participants were trans-genders

Table.2: Prevalence of NCD risk factors in the study population

| Variables                                         | Weighted percentage and 95% CI |             | Weighted percentage and 95% CI by sex |                 | Weighted percentage and 95% CI by area of residence |                 |      |             |      |             |
|---------------------------------------------------|--------------------------------|-------------|---------------------------------------|-----------------|-----------------------------------------------------|-----------------|------|-------------|------|-------------|
|                                                   | Total (N=12012)                |             | Male (N=4472)                         | Female (N=7537) | Urban (N=6087)                                      | Rural (N= 5925) |      |             |      |             |
| Current tobacco use                               | 7.9                            | (7.2-8.7)   | 20.3                                  | (18.6-22.1)     | 0.6                                                 | (0.4-0.9)       | 7.2  | (6.0-8.6)   | 8.1  | (7.2-9.0)   |
| Current alcohol use                               | 8.7                            | (7.9-9.6)   | 28.9                                  | (26.5-31.4)     | 0.2                                                 | (0.1-0.4)       | 8.9  | (7.6-10.3)  | 8.7  | (7.7-9.7)   |
| Physical inactivity (< 600 MET* minutes per week) | 21.9                           | (20.4-23.5) | 23.7                                  | (21.8-25.7)     | 20.8                                                | (19.0-22.8)     | 23   | (20.8-25.3) | 21.7 | (20.0-23.5) |
| Overweight                                        | 30.4                           | (29.1-31.7) | 28.2                                  | (26.2-30.3)     | 31.6                                                | (30.0-33.3)     | 33.5 | (31.5-35.4) | 29.7 | (28.2-31.2) |
| Obesity                                           | 8.9                            | (8.1-9.7)   | 5.5                                   | (4.6-6.5)       | 10.9                                                | (9.9-12.0)      | 11.2 | (9.9-12.7)  | 8.4  | (7.5-9.3)   |
| Abdominal obesity                                 | 60.2                           | (58.5-61.8) | 39.1                                  | (36.6-41.7)     | 72.6                                                | (70.7-74.5)     | 67.4 | (65.0-69.7) | 58.6 | (56.6-60.5) |
| Raised blood pressure†                            | 30.4                           | (29.1-31.7) | 34.6                                  | (32.6-36.7)     | 27.9                                                | (26.4-29.4)     | 33.1 | (31.3-34.9) | 29.8 | (28.3-31.3) |
| Raised FBG‡                                       | 19.2                           | (18.1-20.3) | 19.8                                  | (18.2-21.6)     | 18.8                                                | (17.4-20.2)     | 19.8 | (18.1-21.6) | 19   | (17.7-21.4) |
| Pre-diabetes                                      | 35.3                           | (33.6-37.1) | 36.1                                  | (33.7-38.4)     | 34.9                                                | (32.8-37.0)     | 31.7 | (29.6-33.9) | 36.1 | (34.0-38.2) |

\*MET = metabolic equivalents

†Numerator includes people with raised blood pressure and those who were under treatment (self-reported) for hypertension.

‡ FBG = fasting blood glucose; numerator includes people with raised fasting blood glucose values and those who were under treatment (self-reported) for diabetes.

All estimates and 95% CI were adjusted for 1387 clusters

Table.3: Mean levels of risk factors (weighted means) in the study population

| Variables                                      | Weighted mean and 95% CI |               | Weighted mean and 95% CI by sex |                  | Weighted mean and 95% CI by area of residence |                 |
|------------------------------------------------|--------------------------|---------------|---------------------------------|------------------|-----------------------------------------------|-----------------|
|                                                | Total (N= 12012)         |               | Male (N=4472)                   | Female (N= 7537) | Urban (N=6087)                                | Rural (N= 5925) |
| Systolic BP in mmHg                            | 126.6                    | (126.1-127.1) | 129.4                           | 125              | 126.6                                         | 126.6           |
| Diastolic BP in mmHg                           | 80.8                     | (80.4-81.1)   | 82.6                            | 79.7             | 80.9                                          | 80.7            |
| FBG in mg/dl                                   | 108.6                    | (107.4-109.7) | 108.9                           | 108.4            | 108.4                                         | 108.6           |
| Fruit intake (servings/day)                    | 1.1                      | (1.0-1.1)     | 1.1                             | 1                | 1                                             | 1.1             |
| Vegetable intake (servings /day)               | 2                        | (1.9-2.1)     | 2                               | 2                | 1.9                                           | 2               |
| Mean vegetable and fruit intake (servings/day) | 1.5                      | (1.4-1.6)     | 1.5                             | 1.5              | 1.4                                           | 1.6             |
| Salt (sodium chloride) intake, (g/day)         | 6.7                      | (6.6-6.8)     | 5.3                             | 7.5              | 6.6                                           | 6.7             |
| Body mass index in kg/m <sup>2</sup>           | 24.2                     | (24.1-24.4)   | 23.6                            | 24.5             | 24.9                                          | 24.1            |
| Waist circumference in cm                      | 86.2                     | (85.8-86.6)   | 86.4                            | 86.1             | 88.2                                          | 85.8            |

CI= Confidence Interval, BP = blood pressure, FBG =fasting blood glucose, cm= centimetres, kg= Kilogram, mmHg= millimetres of mercury, mg/dl = milligram/decilitre, g/day = gram per day; All estimates and 95% CIs are adjusted for 1387 clusters

1  
2  
3  
4  
5  
6 Figure legends

7 Figure 1: Study sample selection flow-chart

8 Figure 2. Clustering of NCD risk factors in the study population  
9  
10  
11  
12  
13  
14  
15  
16  
17  
18  
19  
20  
21  
22  
23  
24  
25  
26  
27  
28  
29  
30  
31  
32  
33  
34  
35  
36  
37  
38  
39  
40  
41  
42  
43  
44  
45  
46  
47

For peer review only

#### A. Contributorship statement

Sankara Sarma contributed to the design, data analysis, data interpretation and reviewing the manuscript; Rajeev Sadanandan contributed to the concept, data interpretation and reviewing the manuscript; Jissa Vinoda Thulaseedharan contributed to the design, data analysis, drafting and reviewing the manuscript; Biju Soman contributed to the design, data acquisition, data analysis, data interpretation, drafting and reviewing the manuscript; K Srinivasan contributed to the design, data interpretation and reviewing the manuscript; Ravi Prasad Varma contributed to the design, data analysis, data interpretation and reviewing the manuscript, Manju R Nair contributed to the design, data analysis, data interpretation and reviewing the manuscript; AS Pradeepkumar contributed to the design, data acquisition, data analysis, data interpretation and reviewing the manuscript; Panniyammakal Jeemon contributed to the data analysis and data interpretation, drafting and reviewing the manuscript; KR Thankappan contributed to the concept, data acquisition, data interpretation and reviewing the manuscript; V Raman Kutty contributed to the concept, data interpretation and reviewing the manuscript.

#### B. Competing interest

We declare that there were no competing interests.

#### C. Data Sharing statement

This article is the first paper from the research work. We are still working on the data, and the data will be made available soon. Meanwhile, we shall share the data on request for legitimate use.



1  
2  
3 REFERENCE  
4  
5

- 6 1. India State-Level Disease Burden Initiative Collaborators. Nations within a nation: variations in  
7 epidemiological transition across the states of India, 1990-2016 in the Global Burden of Disease  
8 Study. *Lancet* 2017;390(10111):2437-60. doi: 10.1016/S0140-6736(17)32804-0  
9
- 10 2. ICMR, PHFI, IHME. India: Health of the Nation's States-The India State-Level Disease Burden Initiative.  
11 New Delhi, 2017.  
12
- 13 3. Daivadanam M, Absetz P, Sathish T, *et al.* Lifestyle change in Kerala, India: needs assessment and  
14 planning for a community-based diabetes prevention trial. *BMC Public Health* 2013;13:95.  
15 doi:10.1186/1471-2458-13-95  
16
- 17 4. Census (2011), Primary Census abstracts. Office of the Registrar General & Census Commissioner,  
18 India: Ministry of Home Affairs, Government of India, 2011.  
19
- 20 5. Thankappan KR, Shah B, Mathur P, *et al.* Risk factor profile for chronic non-communicable diseases:  
21 results of a community-based study in Kerala, India. *Indian J Med Res* 2010;131:53-63.  
22
- 23 6. Kish L. A Procedure for Objective Respondent Selection within the Household. *Journal of the*  
24 *American Statistical Association* 1949;44(247):380-87. doi: 10.1080/01621459.1949.10483314  
25
- 26 7. World Health Organization. NCDs | STEPS Manual. WHO. 2017.  
27 <http://www.who.int/ncds/surveillance/steps/manual/en/> (accessed 9 Nov 2018).  
28
- 29 8. WHO. Department of Chronic Diseases and Health Promotion/Surveillance and Population-Based  
30 Prevention/World Health Organization. Global Physical Activity Questionnaire (GPAQ). Geneva  
31 2002.  
32
- 33 9. National High Blood Pressure Education Program. The Seventh Report of the Joint National  
34 Committee on Prevention, Detection, Evaluation, and Treatment of High Blood Pressure.  
35 Bethesda (MD):: National Heart, Lung, and Blood Institute (US) 2004.  
36 <http://www.ncbi.nlm.nih.gov/books/NBK9630/> (accessed 9 Nov 2018).  
37
- 38 10. Kawasaki T, Itoh K, Uezono K, *et al.* A simple method for estimating 24 h urinary sodium and  
39 potassium excretion from second-morning voiding urine specimen in adults. *Clin Exp Pharmacol*  
40 *Physiol* 1993;20(1):7-14.  
41
- 42 11. Johnson C, Mohan S, Praveen D, *et al.* Protocol for developing the evidence base for a national salt  
43 reduction programme for India. *BMJ Open* 2014;4:e006629. doi:10.1136/bmjopen-2014-006629  
44
- 45 12. Johnson C, Mohan S, Rogers K, *et al.* Mean Dietary Salt Intake in Urban and Rural Areas in India: A  
46 Population Survey of 1395 Persons. *J Am Heart Assoc* 2017;6. doi:10.1161/JAHA.116.004547  
47  
48  
49  
50  
51  
52  
53  
54  
55  
56  
57  
58  
59  
60

- 1  
2  
3  
4  
5  
6  
7  
8  
9  
10  
11  
12  
13  
14  
15  
16  
17  
18  
19  
20  
21  
22  
23  
24  
25  
26  
27  
28  
29  
30  
31  
32  
33  
34  
35  
36  
37  
38  
39  
40  
41  
42  
43  
44  
45  
46  
47  
48  
49  
50  
51  
52  
53  
54  
55  
56  
57  
58  
59  
60
13. James PA, Oparil S, Carter BL, et al. 2014 evidence-based guideline for the management of high blood pressure in adults: a report from the panel members appointed to the Eighth Joint National Committee (JNC 8). *JAMA* 2014;311(5):507-20. doi: 10.1001/jama.2013.284427
  14. WHO. Obesity: preventing and managing the global epidemic. World Health Organization. Geneva. 2000
  15. Alberti KG, Zimmet P, Shaw J. Metabolic syndrome--a new world-wide definition. A Consensus Statement from the International Diabetes Federation. *Diabet Med* 2006;23(5):469-80. doi: 10.1111/j.1464-5491.2006.01858.x
  16. Sathish T, Kannan S, Sarma SP, et al. Seven-year longitudinal change in risk factors for non-communicable diseases in rural Kerala, India: The WHO STEPS approach. *PLOS ONE* 2017;12:e0178949. doi:10.1371/journal.pone.0178949
  17. Oommen AM, Abraham VJ, George K, et al. Prevalence of risk factors for non-communicable diseases in rural & urban Tamil Nadu. *Indian J Med Res* 2016;144:460-71. doi:10.4103/0971-5916.198668
  18. Anchala R, Kannuri NK, Pant H, et al. Hypertension in India: a systematic review and meta-analysis of prevalence, awareness, and control of hypertension. *J Hypertens* 2014;32:1170-7. doi:10.1097/HJH.0000000000000146
  19. Garg A, Anand T, Sharma U, et al. Prevalence of Risk Factors for Chronic Non-communicable Diseases Using WHO Steps Approach in an Adult Population in Delhi. *J Family Med Prim Care* 2014;3:112-8. doi:10.4103/2249-4863.137617
  20. Sajeev P, Soman B. Prevalence of noncommunicable disease risk factors among the Kani tribe in Thiruvananthapuram district, Kerala. *Indian Heart Journal* 2018;70:598-603. doi:10.1016/j.ihj.2018.01.022
  21. Mohan V, Deepa M, Anjana RM, et al. Incidence of diabetes and pre-diabetes in a selected urban south Indian population (CUPS-19). *J Assoc Physicians India* 2008;56:152-7.
  22. A. R, Abraham SB, Reddy TG, et al. A community study of alcohol consumption in a rural area in South India. *Int J Community Med Public Health* 2017;4:2172. doi:10.18203/2394-6040.ijcmph20172197
  23. Teramoto T, Kawamori R, Miyazaki S, et al. Sodium intake in men and potassium intake in women determine the prevalence of metabolic syndrome in Japanese hypertensive patients: OMEGA Study. *Hypertens Res* 2011;34:957-62. doi:10.1038/hr.2011.63
  24. He J, Gu D, Chen J, et al. Gender Difference in Blood Pressure Responses to Dietary Sodium Intervention in the GenSalt Study. *J Hypertens* 2009;27:48-54. <https://www.ncbi.nlm.nih.gov/pmc/articles/PMC2882679/> (accessed 15 Jun 2019).

- 1
- 2
- 3
- 4
- 5
- 6 25. Rhee M-Y, Kim J-H, Shin S-J, et al. Estimation of 24-Hour Urinary Sodium Excretion Using Spot Urine
- 7 Samples. *Nutrients* 2014;6:2360–75. doi:10.3390/nu6062360
- 8
- 9 26. Jeemon P, Prabhakaran D, Goenka S, et al. Impact of comprehensive cardiovascular risk reduction
- 10 programme on risk factor clustering associated with elevated blood pressure in an Indian
- 11 industrial population. *Indian J Med Res* 2012;135(4):485-93.
- 12
- 13 27. Reddy KS, Prabhakaran D, Jeemon P, et al. Educational status and cardiovascular risk profile in
- 14 Indians. *Proc Natl Acad Sci USA* 2007;104:16263–8. doi:10.1073/pnas.0700933104
- 15
- 16 28. Kim YJ, Lee JS, Park J, et al. Trends in socioeconomic inequalities in five major risk factors for
- 17 cardiovascular disease in the Korean population: a cross-sectional study using data from the
- 18 Korea National Health and Nutrition Examination Survey, 2001–2014. *BMJ Open*
- 19 2017;7:e014070. doi:10.1136/bmjopen-2016-014070
- 20
- 21
- 22 29. Tracey ML, Fitzgerald S, Geaney F, et al. Socioeconomic inequalities of cardiovascular risk factors
- 23 among manufacturing employees in the Republic of Ireland: A cross-sectional study. *Preventive*
- 24 *Medicine Reports* 2015;2:699–703. doi:10.1016/j.pmedr.2015.08.003
- 25
- 26 30. Psaltopoulou T, Hatzis G, Papageorgiou N, et al. Socioeconomic status and risk factors for
- 27 cardiovascular disease: Impact of dietary mediators. *Hellenic Journal of Cardiology*
- 28 2017;58:32–42. doi:10.1016/j.hjc.2017.01.022
- 29
- 30
- 31 31. Jahangiry L, Ghanbari J, Abbasalizad Farhangi M, et al. Predictors of poor blood pressure control
- 32 among Iranian hypertensive patients. *BMC Res Notes* 2017;10. doi:10.1186/s13104-017-2971-4
- 33
- 34 32. Gillespie CD, Hurvitz KA, Centers for Disease Control and Prevention (CDC). Prevalence of
- 35 hypertension and controlled hypertension - the United States, 2007-2010. *MMWR supplements*
- 36 2013;62:144–8.
- 37
- 38
- 39 33. Xu D, Chen W, Li X, et al. Factors Associated with Blood Pressure Control in Hypertensive Patients
- 40 with Coronary Heart Disease: Evidence from the Chinese Cholesterol Education Program. *PLoS*
- 41 *One* 2013;8. doi:10.1371/journal.pone.0063135
- 42
- 43 34. Song Y, Liu X, Zhu X, et al. Increasing trend of diabetes combined with hypertension or
- 44 hypercholesterolemia: NHANES data analysis 1999–2012. *Sci Rep* 2016;6.
- 45 doi:10.1038/srep36093
- 46
- 47 35. Ghannem HB. 103: Challenges of Preventing Non-Communicable Diseases Risk Factors in Urban
- 48 Context in Tunisia. *BMJ Open* 2015;5:BMJ open-2015-forum2015abstracts.103.
- 49 doi:10.1136/bmjopen-2015-forum2015abstracts.103
- 50
- 51
- 52 36. Pullar J, Allen L, Townsend N, et al. The impact of poverty reduction and development interventions
- 53 on non-communicable diseases and their behavioural risk factors in low and lower-middle-
- 54 income countries: A systematic review. *PLOS ONE* 2018;13:e0193378.
- 55 doi:10.1371/journal.pone.0193378
- 56
- 57
- 58
- 59
- 60

- 1  
2  
3  
4 37. Hunter DJ, Reddy KS. Noncommunicable diseases. *N Engl J Med* 2013;369(14):1336-43. doi:  
5 10.1056/NEJMra1109345  
6  
7  
8 38. Allen LN, Pullar J, Wickramasinghe KK, et al. Evaluation of research on interventions aligned to WHO  
9 'Best Buys' for NCDs in low-income and lower-middle-income countries: a systematic review  
10 from 1990 to 2015. *BMJ Glob Health* 2018;3(1):e000535. doi: 10.1136/bmjgh-2017-000535  
11  
12 39. Daivadanam M, Absetz P, Sathish T, et al. Lifestyle change in Kerala, India: needs assessment and  
13 planning for a community-based diabetes prevention trial. *BMC Public Health* 2013;13:95.  
14 doi:10.1186/1471-2458-13-95  
15  
16 40. Thankappan KR, Daivadanam M, Sarma P, et al. Smoking cessation among diabetes patients: results  
17 of a pilot randomised controlled trial in Kerala, India. *BMC Public Health* 2013;13:47.  
18 doi:10.1186/1471-2458-13-47  
19  
20  
21 41. Mathews E, Thomas E, Absetz P, et al. Cultural adaptation of a peer-led lifestyle intervention  
22 program for diabetes prevention in India: the Kerala diabetes prevention program (K-DPP). *BMC*  
23 *Public Health* 2018;17:974. doi:10.1186/s12889-017-4986-0  
24  
25 42. Thakur J, Jeet G, Tripathy J. m-STEPS: Developing and implementing a smart, innovative android tool  
26 for noncommunicable disease risk factor (STEPS) survey in India. *International Journal of*  
27 *Noncommunicable Diseases* 2016;1:91. doi:10.4103/2468-8827.192018  
28  
29  
30 43. Riley L, Guthold R, Cowan M, et al. The World Health Organization STEPwise Approach to  
31 Noncommunicable Disease Risk-Factor Surveillance: Methods, Challenges, and Opportunities.  
32 *Am J Public Health* 2016;106:74–8. doi:10.2105/AJPH.2015.302962  
33  
34  
35  
36  
37  
38

#### 39 FUNDING

40 Financial support for this survey was met from the grant given by the Government of Kerala to  
41 Sree Chitra Tirunal Institute for Medical Sciences & Technology (G.O.(Rt.) No.  
42 609/2016/H&FWD dated 24/02/2016) for the Prevention and Control of Non-communicable  
43 diseases in Kerala.  
44  
45  
46  
47  
48  
49  
50  
51  
52  
53  
54  
55  
56  
57  
58  
59  
60

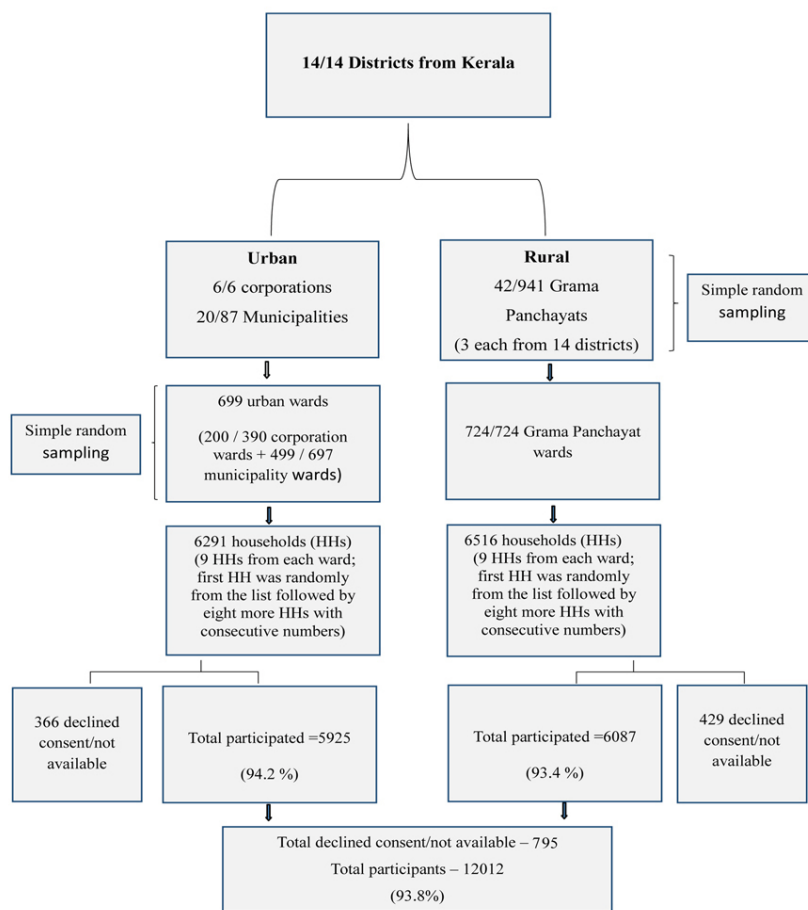

Figure 1: Study sample selection flow-chart

90x90mm (300 x 300 DPI)

Figure 2. Clustering of NCD risk factors in the study population

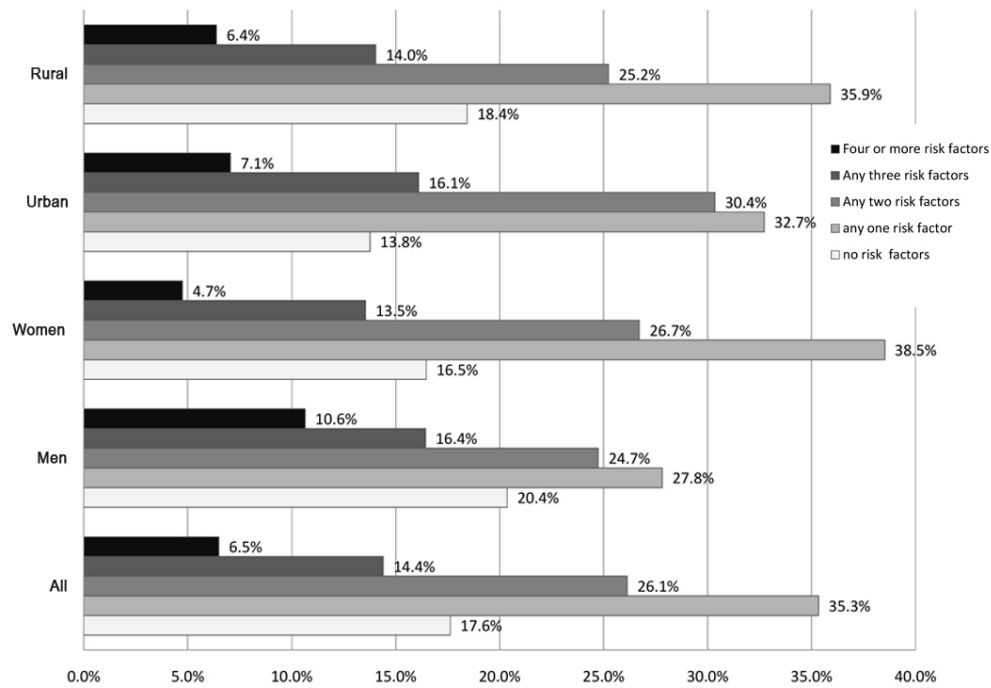

Figure 2: Clustering of NCD risk factors in the study population

90x90mm (300 x 300 DPI)

**STROBE 2007 (v4) Statement—Checklist of items that should be included in reports of *cross-sectional studies***

| Section/Topic                | Item # | Recommendation                                                                                                                                                                       | Reported on page # |
|------------------------------|--------|--------------------------------------------------------------------------------------------------------------------------------------------------------------------------------------|--------------------|
| <b>Title and abstract</b>    | 1      | (a) Indicate the study's design with a commonly used term in the title or the abstract                                                                                               | 1,2                |
|                              |        | (b) Provide in the abstract an informative and balanced summary of what was done and what was found                                                                                  | 2                  |
| <b>Introduction</b>          |        |                                                                                                                                                                                      |                    |
| Background/rationale         | 2      | Explain the scientific background and rationale for the investigation being reported                                                                                                 | 4                  |
| Objectives                   | 3      | State specific objectives, including any prespecified hypotheses                                                                                                                     | 4                  |
| <b>Methods</b>               |        |                                                                                                                                                                                      |                    |
| Study design                 | 4      | Present key elements of study design early in the paper                                                                                                                              | 4                  |
| Setting                      | 5      | Describe the setting, locations, and relevant dates, including periods of recruitment, exposure, follow-up, and data collection                                                      | 5                  |
| Participants                 | 6      | (a) Give the eligibility criteria, and the sources and methods of selection of participants                                                                                          | 5-6                |
| Variables                    | 7      | Clearly define all outcomes, exposures, predictors, potential confounders, and effect modifiers. Give diagnostic criteria, if applicable                                             | 6-8                |
| Data sources/<br>measurement | 8*     | For each variable of interest, give sources of data and details of methods of assessment (measurement). Describe comparability of assessment methods if there is more than one group | 6-8                |
| Bias                         | 9      | Describe any efforts to address potential sources of bias                                                                                                                            | 9                  |
| Study size                   | 10     | Explain how the study size was arrived at                                                                                                                                            | 5                  |
| Quantitative variables       | 11     | Explain how quantitative variables were handled in the analyses. If applicable, describe which groupings were chosen and why                                                         | 9-11               |
| Statistical methods          | 12     | (a) Describe all statistical methods, including those used to control for confounding                                                                                                | 11                 |
|                              |        | (b) Describe any methods used to examine subgroups and interactions                                                                                                                  | 11                 |
|                              |        | (c) Explain how missing data were addressed                                                                                                                                          | 11                 |
|                              |        | (d) If applicable, describe analytical methods taking account of sampling strategy                                                                                                   | 11                 |
|                              |        | (e) Describe any sensitivity analyses                                                                                                                                                | 11                 |
| <b>Results</b>               |        |                                                                                                                                                                                      | 12-14              |

|                          |     |                                                                                                                                                                                                              |              |
|--------------------------|-----|--------------------------------------------------------------------------------------------------------------------------------------------------------------------------------------------------------------|--------------|
| Participants             | 13* | (a) Report numbers of individuals at each stage of study—eg numbers potentially eligible, examined for eligibility, confirmed eligible, included in the study, completing follow-up, and analysed            | 12, Figure 1 |
|                          |     | (b) Give reasons for non-participation at each stage                                                                                                                                                         | NA           |
|                          |     | (c) Consider use of a flow diagram                                                                                                                                                                           | Figure 1     |
| Descriptive data         | 14* | (a) Give characteristics of study participants (eg demographic, clinical, social) and information on exposures and potential confounders                                                                     | 12           |
|                          |     | (b) Indicate number of participants with missing data for each variable of interest                                                                                                                          | 12           |
| Outcome data             | 15* | Report numbers of outcome events or summary measures                                                                                                                                                         | 12-14        |
| Main results             | 16  | (a) Give unadjusted estimates and, if applicable, confounder-adjusted estimates and their precision (eg, 95% confidence interval). Make clear which confounders were adjusted for and why they were included | 12-14        |
|                          |     | (b) Report category boundaries when continuous variables were categorized                                                                                                                                    | 12-14        |
|                          |     | (c) If relevant, consider translating estimates of relative risk into absolute risk for a meaningful time period                                                                                             | NA           |
| Other analyses           | 17  | Report other analyses done—eg analyses of subgroups and interactions, and sensitivity analyses                                                                                                               | NA           |
| <b>Discussion</b>        |     |                                                                                                                                                                                                              |              |
| Key results              | 18  | Summarise key results with reference to study objectives                                                                                                                                                     | 12           |
| Limitations              | 19  | Discuss limitations of the study, taking into account sources of potential bias or imprecision. Discuss both direction and magnitude of any potential bias                                                   | 17           |
| Interpretation           | 20  | Give a cautious overall interpretation of results considering objectives, limitations, multiplicity of analyses, results from similar studies, and other relevant evidence                                   | 15-16        |
| Generalisability         | 21  | Discuss the generalisability (external validity) of the study results                                                                                                                                        | 17,18        |
| <b>Other information</b> |     |                                                                                                                                                                                                              |              |
| Funding                  | 22  | Give the source of funding and the role of the funders for the present study and, if applicable, for the original study on which the present article is based                                                | 27           |

\*Give information separately for cases and controls in case-control studies and, if applicable, for exposed and unexposed groups in cohort and cross-sectional studies.

**Note:** An Explanation and Elaboration article discusses each checklist item and gives methodological background and published examples of transparent reporting. The STROBE checklist is best used in conjunction with this article (freely available on the Web sites of PLoS Medicine at <http://www.plosmedicine.org/>, Annals of Internal Medicine at <http://www.annals.org/>, and Epidemiology at <http://www.epidem.com/>). Information on the STROBE Initiative is available at [www.strobe-statement.org](http://www.strobe-statement.org).

Cuschieri S. The STROBE guidelines. *Saudi J Anaesth* 2019;**13**:S31–4. doi:[10.4103/sja.SJA\\_543\\_18](https://doi.org/10.4103/sja.SJA_543_18)
